# Supplementary material for: Co-option and neofunctionalization of stomatal executors for defence against herbivores in Brassicales
Source: Nat Plants. 2025 Feb 24;11(3):483–504. doi: 10.1038/s41477-025-01921-1 (PMC11928322; doi:10.1038/s41477-025-01921-1)
Supplement: Supplementary file 10 — WSB regulates the expression of MC-related and GC-related genes. [file 41477_2025_1921_MOESM10_ESM.xlsx]

## Sheet: Sheet1
gene list
MC	GC	wsb_down		1476	2633	2305	54	114	42	173
4277 genes	5094 genes	383 genes		MC	MC & GC	GC	MC and wsb_down	MC & GC & wsb_down	GC and wsb_down	wsb_down
AT5G28490	AT2G21140	AT5G25980		AT4G25950	AT4G22233	AT2G21140	AT5G28490	AT2G28420	AT2G39690	AT3G52430
AT2G34810	AT3G17070	AT5G26000		AT5G42690	AT4G02280	AT3G17070	AT2G34810	AT1G71050	AT3G55500	AT3G01345
AT4G25950	AT1G08165	AT1G71050		AT1G57560	AT1G63180	AT1G08165	AT3G58000	AT3G57600	AT1G11260	AT5G26690
AT3G58000	AT4G38420	AT2G47260		AT4G37430	AT2G45890	AT4G38420	AT5G25980	AT1G11450	AT2G44570	AT2G04450
AT5G42690	AT1G08810	AT3G57600		AT5G44567	AT4G04450	AT1G08810	AT5G53592	AT3G60720	AT2G31940	AT2G14960
AT1G57560	AT1G24577	AT5G53870		AT5G09976	AT3G24140	AT1G24577	AT5G53870	AT1G04920	AT5G17830	AT1G08050
AT5G25980	AT5G18430	AT5G28490		AT1G27040	AT1G75030	AT5G18430	AT5G60220	AT1G70020	AT5G06750	AT5G61740
AT4G37430	AT3G62820	AT3G52430		AT5G26730	AT5G50443	AT3G62820	AT1G23380	AT2G19810	AT2G32800	AT2G33390
AT5G44567	AT4G18050	AT3G30720		AT2G02240	AT3G29770	AT4G18050	AT4G01440	AT5G66440	AT3G57070	AT5G06330
AT5G09976	AT1G79910	AT2G31940		AT1G16850	AT2G46070	AT1G79910	AT3G56620	AT3G16400	AT5G20830	AT5G60440
AT1G27040	AT2G04570	AT3G01345		AT1G05300	AT3G02380	AT2G04570	AT1G23170	AT5G26000	AT1G73200	AT1G17147
AT5G26730	AT3G23430	AT1G23170		AT1G10610	AT4G12430	AT3G23430	AT3G60520	AT4G37870	AT5G45110	AT5G44400
AT5G53592	AT2G20875	AT1G04920		AT1G30515	AT1G03440	AT2G20875	AT4G15120	AT1G33811	AT1G04770	AT5G62630
AT5G53870	AT1G04800	AT2G28420		AT3G20015	AT5G25840	AT1G04800	AT3G16340	AT2G29995	AT2G45880	AT5G07780
AT5G60220	AT1G10060	AT3G55500		AT4G27950	AT2G46000	AT1G10060	AT3G60540	AT4G24026	AT3G07360	AT5G04720
AT1G23380	AT1G24400	AT5G60220		AT2G41190	AT3G01310	AT1G24400	AT1G06475	AT1G69050	AT4G29900	AT4G25940
AT4G01440	AT3G53720	AT2G41180		AT3G06360	AT2G33400	AT3G53720	AT4G30940	AT3G49120	AT4G14365	AT5G22380
AT3G56620	AT2G39690	AT5G26690		AT5G37660	AT5G14920	AT2G47485	AT2G47260	AT2G25900	AT5G64360	AT4G00330
AT2G02240	AT2G47485	AT3G56620		AT1G77690	AT1G52910	AT3G23840	AT4G01480	AT4G28330	AT4G21740	AT2G32680
AT1G16850	AT3G23840	AT4G01440		AT5G20400	AT2G28620	AT1G78530	AT5G06790	AT1G09210	AT1G78260	AT5G54710
AT1G05300	AT1G78530	AT2G04450		AT4G26490	AT1G16960	AT4G24140	AT1G04980	AT2G15830	AT1G19330	AT2G10608
AT1G10610	AT4G24140	AT2G14960		AT2G39830	AT4G03415	AT2G21080	AT3G57530	AT5G60680	AT5G19280	AT1G33055
AT1G23170	AT2G21080	AT5G60800		AT2G40740	AT3G09730	AT1G62400	AT3G15450	AT2G30930	AT2G30250	AT4G02330
AT1G30515	AT1G62400	AT1G76040		AT3G13175	AT5G26731	AT3G51760	AT2G38470	AT4G36500	AT1G28330	AT1G56240
AT3G20015	AT3G51760	AT5G53592		AT1G62480	AT2G06255	AT4G17970	AT5G66210	AT1G59870	AT5G51550	AT5G52760
AT4G27950	AT3G55500	AT2G26190		AT4G20050	AT5G46230	AT2G29940	AT3G18690	AT2G25510	AT1G28480	AT1G56150
AT2G41190	AT4G17970	AT1G28480		AT1G77920	AT5G43020	AT2G28410	AT1G33600	AT4G23180	AT3G46640	AT5G55460
AT3G06360	AT2G29940	AT4G36500		AT1G78110	AT5G65590	AT4G00820	AT5G49280	AT2G31880	AT1G70740	AT1G56250
AT5G37660	AT2G28410	AT1G08050		AT5G42680	AT1G18840	AT4G24480	AT1G07000	AT3G56710	AT2G38790	AT5G22545
AT1G77690	AT4G00820	AT5G55450		AT2G47780	AT3G01470	AT1G52827	AT2G23320	AT5G19140	AT4G33300	AT5G05460
AT5G20400	AT4G24480	AT3G58000		AT3G59530	AT3G58640	AT5G41040	AT3G47250	AT1G55450	AT5G21090	AT1G07520
AT4G26490	AT1G52827	AT5G61740		AT1G56080	AT5G07110	AT4G18290	AT2G40020	AT5G44070	AT5G64340	AT5G25440
AT3G60520	AT5G41040	AT4G02410		AT2G22420	AT3G49600	AT2G46720	AT3G44735	AT5G08330	AT5G14270	AT4G31730
AT2G39830	AT4G18290	AT2G15830		AT1G07750	AT1G27680	AT4G08910	AT1G51700	AT4G22780	AT1G61100	AT1G35710
AT4G15120	AT2G46720	AT2G33390		AT5G41800	AT5G65660	AT1G62300	AT3G59310	AT1G31580	AT1G67850	AT3G29250
AT3G16340	AT4G08910	AT5G06330		AT2G01540	AT3G24150	AT5G37500	AT5G58120	AT1G72430	AT3G11420	AT3G06435
AT2G40740	AT1G62300	AT2G24600		AT4G04190	AT3G56170	AT3G55646	AT5G48380	AT1G66970	AT5G04760	AT1G07220
AT3G13175	AT5G37500	AT5G60440		AT5G03530	AT5G11230	AT4G33150	AT1G05675	AT2G26190	AT2G38290	AT3G47570
AT1G62480	AT3G55646	AT3G49120		AT5G02460	AT2G39800	AT1G26600	AT2G24570	AT2G26240	AT3G03020	AT1G69840
AT4G20050	AT4G33150	AT1G28330		AT1G35320	AT4G35070	AT2G40260	AT2G41180	AT1G08930	AT3G44670	AT5G10760
AT1G77920	AT1G26600	AT1G11450		AT1G75760	AT1G19620	AT1G01900	AT1G70520	AT4G35600	AT3G51890	AT5G16880
AT1G78110	AT2G40260	AT2G46600		AT1G20070	AT4G29520	AT5G16240	AT1G03730	AT2G15970	AT5G46510	AT3G26170
AT5G42680	AT1G01900	AT4G34480		AT1G25230	AT1G75730	AT5G22740	AT1G31335	AT2G41100		AT4G28150
AT3G60540	AT5G16240	AT4G35600		AT5G59720	AT2G31390	AT2G28260	AT3G19680	AT4G17900		AT5G40942
AT1G06475	AT5G22740	AT1G17147		AT4G13710	AT4G09030	AT3G06778	AT5G02290	AT4G08950		AT3G60420
AT2G47780	AT2G28260	AT1G08930		AT1G51405	AT2G37180	AT1G69320	AT5G21940	AT4G34390		AT1G73805
AT3G59530	AT3G06778	AT1G76970		AT2G42790	AT3G55390	AT2G28870	AT1G19400	AT2G41410		AT3G02680
AT1G56080	AT1G69320	AT5G44400		AT5G21105	AT1G14460	AT5G44550	AT5G66675	AT2G46400		AT3G50650
AT2G22420	AT2G28870	AT5G62630		AT1G35720	AT1G14010	AT5G58580	AT1G08450	AT3G04210		AT3G13980
AT1G07750	AT5G44550	AT5G06790		AT4G35500	AT4G16660	AT2G38300	AT5G19250	AT5G19190		AT5G45100
AT5G41800	AT5G58580	AT1G33811		AT1G22980	AT1G71830	AT4G14480	AT1G25550	AT3G56400		AT1G72100
AT2G01540	AT2G38300	AT5G07780		AT1G52890	AT1G15970	AT4G35030	AT4G37640	AT4G38550		AT4G12900
AT4G04190	AT4G14480	AT5G19250		AT5G65750	AT3G03680	AT5G19580	AT3G30720	AT5G52200		AT3G62280
AT5G03530	AT4G35030	AT5G04720		AT5G53590	AT3G21560	AT1G11340	AT4G34480	AT1G76970		AT1G31130
AT5G02460	AT5G19580	AT4G25940		AT5G66040	AT2G39805	AT3G25620		AT3G25600		AT3G48080
AT1G35320	AT1G11340	AT2G17040		AT5G42200	AT1G17940	AT5G16350		AT4G17230		AT5G39890
AT1G75760	AT3G25620	AT1G70020		AT2G16595	AT3G51980	AT2G21590		AT3G44630		AT3G62780
AT1G20070	AT5G16350	AT5G22380		AT5G16450	AT1G70710	AT1G68500		AT1G13210		AT5G43500
AT1G25230	AT2G21590	AT2G34810		AT3G22850	AT2G39810	AT4G26415		AT1G29690		AT1G03610
AT5G59720	AT1G68500	AT4G00330		AT1G75440	AT1G21750	AT1G77020		AT1G24140		AT2G17442
AT4G13710	AT4G26415	AT2G32680		AT1G12450	AT1G30135	AT1G12480		AT1G59590		AT3G57540
AT1G51405	AT1G77020	AT5G54710		AT2G39920	AT3G50630	AT1G60630		AT2G17120		AT3G10040
AT2G42790	AT1G12480	AT2G10608		AT4G22910	AT2G38370	AT3G04810		AT3G50950		AT3G02480
AT5G21105	AT1G60630	AT5G08330		AT3G62920	AT4G28980	AT1G53060		AT1G27770		AT3G26830
AT1G35720	AT3G04810	AT1G33055		AT1G52190	AT3G51670	AT4G24130		AT2G46600		AT3G48090
AT4G35500	AT1G53060	AT4G02330		AT3G24770	AT5G48485	AT3G24670		AT4G31800		AT5G10380
AT1G22980	AT4G24130	AT1G27770		AT1G24450	AT2G35736	AT3G47295		AT5G24530		AT4G01120
AT1G52890	AT3G24670	AT1G56240		AT3G17790	AT3G23730	AT1G21540		AT1G25440		AT3G24982
AT5G65750	AT3G47295	AT2G33530		AT4G00905	AT4G27270	AT2G21880		AT3G20600		AT2G36420
AT5G53590	AT1G21540	AT5G48380		AT5G37740	AT4G23430	AT4G18820		AT2G44290		AT5G65350
AT5G66040	AT2G21880	AT5G52760		AT1G51170	AT5G48180	AT3G24715		AT5G11970		AT2G15960
AT5G42200	AT4G18820	AT1G25440		AT2G18840	AT1G42480	AT1G79640		AT3G16720		AT3G56210
AT2G16595	AT3G24715	AT1G08450		AT3G47420	AT2G41475	AT4G18830		AT2G41110		AT4G24060
AT5G16450	AT1G79640	AT1G56150		AT3G48100	AT3G62830	AT4G24510		AT4G21980		AT5G45380
AT3G22850	AT4G18830	AT3G45640		AT1G19360	AT5G02280	AT5G04390		AT1G68520		AT4G10270
AT4G30940	AT4G24510	AT3G19680		AT1G35210	AT3G12920	AT4G02940		AT3G07650		AT1G21270
AT1G75440	AT5G04390	AT2G19810		AT2G47330	AT5G39730	AT4G25260		AT4G39640		AT1G78410
AT2G47260	AT4G02940	AT1G68520		AT3G60640	AT1G01300	AT2G16630		AT1G76360		AT1G11050
AT1G12450	AT4G25260	AT5G55460		AT5G60850	AT3G03900	AT4G26470		AT1G22280		AT4G30290
AT4G01480	AT2G16630	AT1G56250		AT2G40280	AT2G37170	AT3G02677		AT5G60800		AT1G23830
AT2G39920	AT4G26470	AT5G22545		AT4G17570	AT4G24920	AT1G44760		AT1G29340		AT2G16060
AT4G22910	AT3G02677	AT1G19400		AT3G61890	AT5G42970	AT2G35910		AT3G45640		AT2G18660
AT3G62920	AT1G44760	AT5G05460		AT5G07910	AT3G10550	AT1G01250		AT3G46600		AT4G11300
AT1G52190	AT2G35910	AT3G20600		AT3G29310	AT2G38610	AT1G76190		AT4G28400		AT1G59620
AT3G24770	AT1G01250	AT1G07520		AT1G19170	AT1G12420	AT5G26280		AT5G52750		AT1G11090
AT5G06790	AT1G76190	AT1G76360		AT4G03400	AT4G18280	AT3G11600		AT4G02410		AT2G32160
AT1G24450	AT1G11260	AT5G25440		AT1G72630	AT1G61930	AT3G02030		AT1G76040		AT5G15120
AT3G17790	AT5G26280	AT3G60520		AT4G00090	AT3G54290	AT5G66400		AT5G48657		AT5G55060
AT4G00905	AT3G11600	AT5G19190		AT3G25540	AT3G52590	AT4G26830		AT4G27230		AT2G20950
AT5G37740	AT3G02030	AT2G26240		AT5G09810	AT3G02230	AT1G75900		AT2G15890		AT2G15840
AT1G51170	AT5G66400	AT3G60720		AT1G09870	AT5G15490	AT2G32430		AT2G01450		AT5G44568
AT2G18840	AT2G44570	AT4G31730		AT5G59000	AT1G12400	AT3G47675		AT4G16860		AT5G17760
AT3G47420	AT4G26830	AT4G31800		AT1G69040	AT5G40970	AT1G68530		AT4G27740		AT2G15042
AT3G48100	AT1G75900	AT2G41430		AT3G13870	AT5G07350	AT1G31935		AT2G24600		AT2G24160
AT1G19360	AT2G32430	AT1G35710		AT5G20660	AT5G60460	AT5G46915		AT1G56060		AT4G07825
AT1G35210	AT3G47675	AT3G16340		AT1G04900	AT3G28040	AT5G22390		AT5G55450		AT3G10190
AT2G47330	AT1G68530	AT3G29250		AT5G59010	AT3G25220	AT3G58850		AT2G24790		AT1G22220
AT3G60640	AT1G31935	AT4G14365		AT1G64490	AT3G52850	AT1G22690		AT3G11820		AT3G46110
AT5G60850	AT5G46915	AT3G06435		AT4G05010	AT1G72610	AT1G51500		AT2G33530		AT1G35230
AT2G40280	AT5G22390	AT4G28330		AT5G52880	AT2G42280	AT1G02650		AT5G24110		AT5G19120
AT4G17570	AT3G58850	AT1G07220		AT4G15955	AT5G43330	AT5G52340		AT2G37430		AT5G49630
AT3G61890	AT1G22690	AT2G44570		AT5G18120	AT4G21960	AT1G21400		AT2G43290		AT2G04515
AT5G07910	AT1G51500	AT2G15890		AT5G48850	AT1G26630	AT3G28910		AT2G22300		AT1G11330
AT3G29310	AT1G02650	AT3G47570		AT1G65900	AT3G14595	AT3G23790		AT4G20830		AT5G40040
AT1G19170	AT5G52340	AT1G69840		AT4G09520	AT3G18040	AT5G67180		AT3G05200		AT5G03360
AT4G03400	AT1G21400	AT5G10760		AT3G50850	AT2G32920	AT3G54820		AT2G41430		AT3G60470
AT1G72630	AT2G31940	AT3G18690		AT5G11010	AT4G38970	AT5G17650		AT4G35480		AT1G24150
AT4G00090	AT3G28910	AT5G16880		AT3G24800	AT5G54440	AT3G47750		AT4G12720		AT2G46590
AT3G25540	AT3G23790	AT3G50950		AT3G04080	AT3G25040	AT1G75891		AT2G20630		AT1G52618
AT5G09810	AT5G67180	AT2G38790		AT3G52490	AT4G16720	AT4G14440		AT3G49530		AT5G37070
AT1G09870	AT3G54820	AT3G26170		AT3G60450	AT2G33380	AT4G19645		AT3G25780		AT2G17130
AT5G59000	AT5G17650	AT2G32200		AT1G20225	AT1G05870	AT4G23920		AT2G32200		AT2G43570
AT1G69040	AT3G47750	AT4G28150		AT1G21660	AT2G45070	AT2G26040		AT5G54860		AT1G77660
AT3G13870	AT1G75891	AT5G40942		AT3G14410	AT2G44060	AT4G24040		AT2G17040		AT4G13820
AT5G20660	AT4G14440	AT1G69050		AT5G03160	AT1G70770	AT4G13345				AT5G60900
AT1G04900	AT4G19645	AT2G32800		AT5G50460	AT3G13520	AT5G66920				AT5G19930
AT5G59010	AT4G23920	AT3G60420		AT4G17260	AT5G47430	AT1G78580				AT3G21810
AT1G64490	AT2G26040	AT2G01450		AT2G33630	AT1G32210	AT4G36250				AT1G01240
AT4G05010	AT4G24040	AT1G73805		AT5G35670	AT3G16240	AT4G22790				AT4G13900
AT5G52880	AT4G13345	AT1G13210		AT2G02810	AT5G47060	AT4G25960				AT5G42440
AT4G15955	AT5G66920	AT3G02680		AT3G09470	AT2G21330	AT1G62370				AT5G41750
AT5G18120	AT1G78580	AT3G59310		AT3G03720	AT2G25620	AT2G24520				AT5G38900
AT5G48850	AT4G36250	AT1G70520		AT1G54030	AT1G71190	AT4G02100				AT3G20330
AT1G65900	AT4G22790	AT2G17120		AT4G16210	AT5G01970	AT5G58000				AT5G61590
AT4G09520	AT4G25960	AT3G50650		AT5G66420	AT5G20700	AT4G27730				AT3G02550
AT3G50850	AT1G62370	AT3G13980		AT1G19600	AT2G25070	AT5G24920				AT5G64810
AT5G11010	AT2G24520	AT4G12720		AT5G04990	AT3G14430	AT3G50340				AT2G32030
AT3G24800	AT4G02100	AT1G72430		AT4G26620	AT3G53520	AT1G25450				AT4G23140
AT3G04080	AT5G58000	AT5G45100		AT4G31420	AT3G01790	AT2G40180				AT2G44180
AT3G52490	AT4G27730	AT1G72100		AT2G47500	AT5G20500	AT2G08220				AT1G23390
AT3G60450	AT5G24920	AT2G41100		AT4G01250	AT3G17365	AT5G22310				AT3G07520
AT1G20225	AT5G17830	AT3G51890		AT1G29060	AT1G20630	AT1G17285				AT5G38310
AT1G21660	AT3G50340	AT4G12900		AT1G79460	AT2G25110	AT1G53470				AT4G23720
AT3G14410	AT1G25450	AT3G62280		AT2G34585	AT1G12090	AT2G19980				AT2G21850
AT5G03160	AT2G40180	AT3G07360		AT4G01710	AT1G66240	AT2G47240				AT1G77410
AT5G50460	AT2G08220	AT5G49280		AT1G05710	AT5G56630	AT5G52120				AT4G39830
AT4G17260	AT5G22310	AT1G31130		AT1G04690	AT3G12490	AT1G47410				AT2G05632
AT2G33630	AT1G17285	AT5G46510		AT4G24550	ATCG00570	AT3G27400				AT1G12990
AT5G35670	AT1G53470	AT3G56400		AT4G32390	AT4G25720	AT5G43150				AT5G45800
AT2G02810	AT2G19980	AT4G23180		AT1G52600	AT3G62250	AT5G45920				AT5G53130
AT3G09470	AT2G47240	AT2G37430		AT3G49601	AT3G05420	AT5G64570				AT5G26170
AT3G03720	AT5G52120	AT3G48080		AT3G01040	AT1G20970	AT1G54450				AT5G22530
AT1G54030	AT5G06750	AT2G29995		AT1G34350	AT2G32060	AT3G11210				AT3G50770
AT4G16210	AT1G47410	AT5G39890		AT5G05660	AT5G27850	AT5G52250				AT2G20142
AT5G66420	AT3G27400	AT4G37870		AT3G02700	AT2G38170	AT5G53890				AT5G44582
AT1G19600	AT5G43150	AT3G62780		AT2G32850	AT3G16640	AT3G13450				AT1G01660
AT1G04980	AT5G45920	AT5G43500		AT5G01175	AT4G02720	AT1G01610				AT2G47130
AT5G04990	AT5G64570	AT1G03610		AT1G64640	AT2G39630	AT2G28570				AT3G22910
AT4G26620	AT1G54450	AT2G38470		AT1G23950	AT3G19010	AT2G45400				AT2G37930
AT4G31420	AT3G11210	AT2G17442		AT2G23810	AT4G02980	AT3G10570				AT5G10030
AT2G47500	AT5G52250	AT3G25600		AT3G45040	AT4G21150	AT3G22840				AT5G54510
AT4G01250	AT5G53890	AT3G57540		AT3G06740	AT5G14550	AT5G40960				AT1G67330
AT1G29060	AT3G13450	AT3G10040		AT4G17010	AT3G60860	AT1G10220				AT3G42725
AT1G79460	AT1G01610	AT1G19330		AT1G54320	AT3G48930	AT1G27890				AT4G31520
AT2G34585	AT2G28570	AT2G23320		AT2G17780	AT2G14740	AT1G75880				AT3G15358
AT4G01710	AT2G45400	AT3G02480		AT4G16800	AT1G18300	AT1G75890				AT1G23840
AT1G05710	AT3G10570	AT3G26830		AT1G69460	ATCG01050	AT3G59435				AT1G67970
AT1G04690	AT3G22840	AT3G48090		AT5G38630	AT3G07680	AT4G31330				AT5G66630
AT4G24550	AT5G40960	AT5G10380		AT1G47240	AT5G19240	AT5G46240				AT3G29140
AT4G32390	AT1G10220	AT5G06750		AT5G16470	AT1G80840	AT5G51750				AT3G43840
AT1G52600	AT1G27890	AT4G01120		AT1G18850	AT5G20290	AT3G50350				AT3G14950
AT3G49601	AT1G75880	AT1G61100		AT5G56500	AT3G09455	AT1G22885				AT3G58780
AT3G01040	AT1G75890	AT3G24982		AT1G34130	AT2G10940	AT5G46220				AT1G74840
AT1G34350	AT3G59435	AT1G31580		AT5G06660	AT4G15780	AT1G17180				AT3G61898
AT5G05660	AT4G31330	AT1G05675		AT3G48820	AT5G17190	AT2G40120				AT5G17150
AT3G02700	AT5G46240	AT5G24530		AT3G20870	AT3G11510	AT2G19990				AT1G71040
AT2G32850	AT5G51750	AT2G36420		AT3G16200	AT5G65390	AT1G17840				AT1G26260
AT5G01175	AT3G50350	AT4G17900		AT5G27830	ATCG01070	AT1G67910				AT1G53710
AT1G64640	AT1G22885	AT4G08950		AT2G36900	AT4G33010	AT1G75170				AT1G10340
AT1G23950	AT5G46220	AT5G65350		AT2G29450	AT3G53740	AT1G69230				AT5G59790
AT2G23810	AT1G17180	AT5G48657		AT5G14240	AT2G41090	AT4G18670				AT1G05570
AT3G45040	AT2G40120	AT2G15960		AT3G48440	AT5G63790	AT3G05470				AT1G02530
AT3G06740	AT2G19990	AT3G56210		AT1G71080	AT2G40205	AT5G18460				AT5G25250
AT4G17010	AT1G17840	AT3G46600		AT1G16520	AT2G13360	AT3G52520
AT1G54320	AT1G67910	AT1G67850		AT1G21900	AT4G17940	AT1G16680
AT2G17780	AT1G75170	AT4G24060		AT4G30500	AT1G52360	AT5G07990
AT4G16800	AT1G69230	AT5G45380		AT4G27520	AT4G29010	AT4G38650
AT1G69460	AT4G18670	AT3G04210		AT4G20430	AT1G19870	AT2G34850
AT5G38630	AT3G05470	AT1G06475		AT4G25680	AT3G47670	AT1G78170
AT1G47240	AT5G18460	AT4G10270		AT3G27770	AT3G62600	AT1G19610
AT5G16470	AT3G52520	AT1G07000		AT1G05055	ATCG00800	AT5G06760
AT1G18850	AT1G16680	AT1G21270		AT2G36300	AT1G29930	AT5G20270
AT5G56500	AT5G07990	AT1G78410		AT1G13950	AT2G40510	AT1G28010
AT1G34130	AT4G38650	AT1G55450		AT1G63780	AT5G62880	AT3G28960
AT5G06660	AT2G34850	AT1G11050		AT5G58710	AT2G46800	AT3G51400
AT3G48820	AT1G78170	AT4G30290		AT5G46720	AT1G12900	AT3G48720
AT3G20870	AT1G19610	AT2G41410		AT1G19710	AT4G17270	AT5G23430
AT3G16200	AT5G06760	AT4G21740		AT1G07020	AT5G18900	AT5G44530
AT5G27830	AT5G20270	AT1G56060		AT5G58640	AT3G50820	AT3G05937
AT2G36900	AT1G28010	AT1G23830		AT4G24570	ATCG01080	AT1G07570
AT2G29450	AT3G28960	AT2G16060		AT4G03240	AT5G58440	AT5G48480
AT5G14240	AT3G51400	AT5G04760		AT4G18800	AT3G11940	AT4G18020
AT3G48440	AT3G48720	AT2G39690		AT3G29575	AT3G27210	AT1G19540
AT1G71080	AT5G23430	AT5G66210		AT3G10220	AT5G06140	AT4G33950
AT1G16520	AT5G44530	AT2G18660		AT5G20180	AT2G20670	AT5G54840
AT1G21900	AT3G05937	AT1G11260		AT1G53650	AT3G52710	AT1G17190
AT4G30500	AT1G07570	AT4G11300		AT4G13070	AT3G21055	AT4G18910
AT4G27520	AT5G48480	AT5G52750		AT4G14145	AT1G62790	AT2G22900
AT4G20430	AT4G18020	AT1G59620		AT3G10572	AT1G11890	AT5G66460
AT4G25680	AT1G19540	AT4G27740		AT2G18390	AT3G56070	AT3G14760
AT3G27770	AT4G33950	AT3G16400		AT5G39340	AT5G49910	AT1G07720
AT1G05055	AT5G54840	AT1G11090		AT1G07135	AT1G56340	AT1G73965
AT2G36300	AT1G17190	AT2G32160		AT1G28540	ATCG00070	AT5G48950
AT1G13950	AT4G18910	AT3G03020		AT4G24990	AT1G76200	AT5G50000
AT1G63780	AT2G22900	AT3G11420		AT4G39240	AT3G02800	AT4G00360
AT5G58710	AT5G66460	AT1G59590		AT3G09090	AT5G19690	AT4G37760
AT5G46720	AT3G14760	AT2G41110		AT1G62422	AT5G47910	AT2G45720
AT1G19710	AT1G07720	AT2G46400		AT4G04925	AT4G27090	AT1G80080
AT1G07020	AT1G73965	AT5G15120		AT1G09330	AT2G04900	AT2G47180
AT5G58640	AT5G48950	AT2G30930		AT2G04378	AT3G46440	AT1G03590
AT4G24570	AT5G50000	AT5G55060		AT1G43130	AT5G20910	AT1G12330
AT4G03240	AT4G00360	AT2G20950		AT2G31490	AT4G19410	AT5G50090
AT4G18800	AT4G37760	AT1G04770		AT1G56330	AT5G46020	AT5G04220
AT3G29575	AT2G45720	AT2G15840		AT4G38740	AT4G27560	AT2G26440
AT3G10220	AT1G80080	AT5G17830		AT5G01010	AT1G60710	AT5G65930
AT5G20180	AT2G47180	AT4G33300		AT2G44310	AT4G20360	AT1G74790
AT1G53650	AT1G03590	AT5G21940		AT4G18950	AT5G03340	AT2G33770
AT4G13070	AT1G12330	AT1G29340		AT1G11840	AT4G29905	AT3G53400
AT4G14145	AT5G50090	AT5G44568		AT1G20330	AT4G25050	AT4G28780
AT3G10572	AT5G04220	AT3G44630		AT3G07220	AT1G06210	AT1G44750
AT2G18390	AT2G26440	AT5G17760		AT4G26570	AT5G66680	AT5G02540
AT5G39340	AT5G65930	AT2G15042		AT2G18330	AT5G42020	AT1G35180
AT1G07135	AT1G74790	AT4G38550		AT2G19780	AT4G31700	AT1G16750
AT1G28540	AT2G33770	AT4G17230		AT3G15290	AT4G17870	AT2G45120
AT4G24990	AT3G53400	AT5G45110		AT1G74410	AT1G56110	AT3G59660
AT4G39240	AT4G28780	AT2G24160		AT5G23535	AT3G14230	AT1G58180
AT3G09090	AT1G44750	AT1G22280		AT5G09260	AT3G47960	AT4G27430
AT1G62422	AT5G02540	AT2G31880		AT2G30020	AT1G08570	AT2G40940
AT3G57530	AT1G35180	AT4G07825		AT1G79590	AT5G15750	AT4G00400
AT4G04925	AT1G16750	AT3G10190		AT2G23290	ATCG00490	AT5G49890
AT1G09330	AT2G45120	AT1G22220		AT2G46170	AT1G76650	AT2G34170
AT2G04378	AT3G59660	AT3G46110		AT2G21160	ATCG00470	AT4G38810
AT1G43130	AT1G58180	AT1G35230		AT2G20820	AT1G29910	AT2G45450
AT2G31490	AT4G27430	AT5G19120		AT5G48412	AT3G55800	AT5G02020
AT1G56330	AT2G40940	AT3G11820		AT2G01670	AT5G51960	AT5G62230
AT4G38740	AT4G00400	AT5G49630		AT3G05000	AT3G46560	AT3G59420
AT5G01010	AT5G49890	AT2G04515		AT3G66654	AT1G56580	AT4G03010
AT2G44310	AT2G34170	AT1G11330		AT5G45420	AT1G61520	AT3G56590
AT4G18950	AT4G38810	AT5G40040		AT3G16570	AT3G19960	AT5G66310
AT1G11840	AT2G45450	AT5G03360		AT5G11640	AT2G19740	AT3G01490
AT1G20330	AT5G02020	AT3G60470		AT2G31710	AT2G22500	AT5G62500
AT3G07220	AT5G62230	AT1G24150		AT4G29960	AT5G02960	AT2G47000
AT4G26570	AT3G59420	AT3G44735		AT4G17720	AT1G20575	AT4G34990
AT2G18330	AT4G03010	AT1G23380		AT3G08630	AT3G63160	AT2G41170
AT2G19780	AT3G56590	AT2G46590		AT4G27130	AT5G08160	AT3G22104
AT3G15290	AT2G32800	AT1G52618		AT5G05610	AT4G04640	AT5G47050
AT1G74410	AT5G66310	AT5G37070		AT4G40042	AT4G10790	AT3G05830
AT5G23535	AT3G01490	AT3G07650		AT5G47420	ATCG00660	AT1G03200
AT5G09260	AT5G62500	AT2G22300		AT2G37250	AT5G14740	AT1G09440
AT2G30020	AT2G47000	AT2G17130		AT4G26410	ATCG00120	AT3G24480
AT1G79590	AT4G34990	AT2G43570		AT5G42380	AT5G47930	AT3G14270
AT2G23290	AT2G41170	AT1G77660		AT2G24830	AT1G02780	AT4G26488
AT2G46170	AT3G22104	AT5G64360		AT1G29310	AT2G21600	AT4G20880
AT2G21160	AT5G47050	AT4G01480		AT1G14180	AT3G62410	AT5G57050
AT2G20820	AT3G05830	AT4G13820		AT3G18940	AT4G27652	AT3G07350
AT5G48412	AT1G03200	AT5G60900		AT5G64170	AT2G23340	AT1G74160
AT2G01670	AT1G09440	AT5G52200		AT5G22080	AT1G67430	AT4G39010
AT3G05000	AT3G24480	AT5G19930		AT5G55850	ATCG00540	AT1G18193
AT3G66654	AT3G14270	AT3G21810		AT4G22285	AT1G77710	AT5G17850
AT5G45420	AT4G26488	AT1G01240		AT3G12030	ATCG00040	AT1G06640
AT3G16570	AT4G20880	AT4G13900		AT5G10790	AT1G19770	AT4G19880
AT5G11640	AT5G57050	AT5G42440		AT4G11080	AT5G58420	AT3G61150
AT2G31710	AT3G07350	AT5G41750		AT1G62820	ATCG00130	AT3G02110
AT4G29960	AT1G74160	AT5G38900		AT3G59380	AT1G45474	AT1G21370
AT4G17720	AT4G39010	AT5G51550		AT2G41700	AT5G03380	AT1G09470
AT3G08630	AT1G18193	AT3G20330		AT1G02305	AT2G37220	AT1G80440
AT4G27130	AT5G17850	AT5G61590		AT5G54430	AT5G64310	AT3G17820
AT5G05610	AT1G06640	AT5G02290		AT1G54250	AT3G14420	AT1G34640
AT4G40042	AT4G19880	AT3G60540		AT2G25460	AT4G29780	AT5G40890
AT5G47420	AT3G61150	AT5G66675		AT3G57490	AT4G00440	AT5G48900
AT2G37250	AT3G02110	AT3G02550		AT1G21410	AT1G76680	AT2G31980
AT4G26410	AT1G21370	AT5G64810		AT2G21660	AT1G69010	AT3G05020
AT5G42380	AT1G09470	AT2G32030		AT1G61620	AT5G10840	AT2G37300
AT2G24830	AT1G80440	AT4G15120		AT5G16550	AT5G16840	AT2G41540
AT1G29310	AT3G17820	AT4G23140		AT1G27435	AT3G49800	AT3G05030
AT1G14180	AT1G34640	AT4G39640		AT3G59890	AT2G21250	AT1G17200
AT3G18940	AT5G40890	AT3G25780		AT1G70330	ATCG00710	AT1G64660
AT3G15450	AT5G48900	AT2G44180		AT4G29720	AT1G56220	AT1G67600
AT5G64170	AT2G31980	AT2G38290		AT5G23920	AT1G43890	AT1G64670
AT5G22080	AT3G05020	AT1G23390		AT1G61790	AT2G36620	AT1G53500
AT5G55850	AT2G37300	AT3G46640		AT4G36648	AT5G06290	AT3G05330
AT4G22285	AT2G41540	AT3G07520		AT5G47030	AT4G30530	AT5G07440
AT3G12030	AT3G05030	AT5G66440		AT5G59550	ATCG00080	AT2G02540
AT5G10790	AT1G17200	AT3G15450		AT3G22110	AT3G49260	AT1G05230
AT4G11080	AT1G64660	AT5G44070		AT3G15260	AT3G44310	AT1G49430
AT1G62820	AT1G67600	AT5G38310		AT4G10330	AT2G30270	AT5G58150
AT3G59380	AT1G64670	AT1G33600		AT1G76065	AT4G37930	AT1G34760
AT2G41700	AT1G53500	AT2G15970		AT5G42190	AT4G17090	AT2G35930
AT2G38470	AT3G05330	AT2G20630		AT2G44670	AT1G78900	AT1G14687
AT1G02305	AT5G07440	AT4G34390		AT1G68560	AT1G32080	AT3G60220
AT5G54430	AT2G02540	AT1G24140		AT3G01740	AT3G17800	AT1G61350
AT1G54250	AT1G05230	AT1G03730		AT5G47750	AT4G17490	AT3G54740
AT2G25460	AT1G49430	AT3G57530		AT4G27350	AT4G14270	AT2G35020
AT3G57490	AT5G58150	AT4G23720		AT1G75840	AT4G31550	AT5G22300
AT1G21410	AT1G34760	AT1G04980		AT2G04630	AT3G03990	AT3G59680
AT2G21660	AT2G35930	AT3G16720		AT4G13640	AT5G03460	AT5G16290
AT1G61620	AT1G14687	AT3G49530		AT2G24270	AT1G03130	AT1G32780
AT5G16550	AT3G60220	AT2G21850		AT2G27020	AT3G63140	AT4G16480
AT1G27435	AT1G61350	AT1G77410		AT2G16930	AT4G12800	AT2G45970
AT3G59890	AT3G54740	AT4G39830		AT3G03980	AT5G64040	AT5G57830
AT1G70330	AT2G35020	AT2G05632		AT4G16146	ATCG01130	AT5G57660
AT4G29720	AT5G22300	AT1G12990		AT2G47690	AT5G20000	AT3G20300
AT5G23920	AT3G59680	AT5G45800		AT3G26340	AT5G13450	AT5G37710
AT1G61790	AT5G16290	AT5G53130		AT2G43780	AT1G13930	AT1G60610
AT4G36648	AT1G32780	AT5G26170		AT1G73540	AT5G07220	AT3G46450
AT5G47030	AT4G16480	AT1G31335		AT1G29850	AT1G68300	AT3G18850
AT5G59550	AT2G45970	AT4G35480		AT5G10270	AT5G06320	AT4G33240
AT3G22110	AT5G57830	AT1G25550		AT1G33470	AT5G16970	AT1G12880
AT3G15260	AT5G57660	AT3G44670		AT2G26975	AT1G01620	AT5G26340
AT4G10330	AT3G20300	AT5G22530		AT1G75860	AT1G77940	AT5G10890
AT1G76065	AT5G37710	AT5G54860		AT4G01100	AT5G08790	AT5G43190
AT5G42190	AT1G60610	AT3G50770		AT3G51040	AT5G11680	AT2G26355
AT2G44670	AT3G46450	AT4G24026		AT5G26610	AT1G31300	AT5G41810
AT1G68560	AT3G18850	AT2G20142		AT5G40830	AT1G04750	AT1G06780
AT3G01740	AT4G33240	AT3G56710		AT5G13810	AT1G17080	AT4G35470
AT5G47750	AT1G12880	AT5G44582		AT3G47610	AT1G17420	AT1G72790
AT4G27350	AT5G26340	AT2G43290		AT1G76850	AT1G35680	AT5G14410
AT1G75840	AT5G10890	AT1G73200		AT3G55980	AT4G37440	AT5G08370
AT2G04630	AT5G43190	AT2G25510		AT5G11720	AT3G17780	AT3G14850
AT5G66210	AT2G26355	AT1G70740		AT5G58490	AT4G30950	AT3G19930
AT4G13640	AT5G41810	AT1G01660		AT4G14600	AT4G10080	AT2G21820
AT2G24270	AT1G06780	AT1G78260		AT1G01320	AT1G76600	AT3G22830
AT2G27020	AT4G35470	AT2G47130		AT4G30550	AT1G30230	AT5G55930
AT2G16930	AT1G72790	AT1G29690		AT1G65820	AT3G53620	AT3G21190
AT3G03980	AT5G14410	AT3G22910		AT2G46330	AT1G78630	AT4G04955
AT4G16146	AT5G08370	AT2G37930		AT5G51620	AT1G09690	AT3G62660
AT2G47690	AT3G14850	AT5G10030		AT3G51270	AT1G50320	AT3G05320
AT3G26340	AT3G19930	AT3G05200		AT3G57030	AT5G14030	AT4G14746
AT2G43780	AT2G21820	AT5G54510		AT4G13050	AT5G09660	AT2G28930
AT1G73540	AT3G22830	AT3G57070		AT1G03330	AT5G38410	AT2G29065
AT1G29850	AT3G57070	AT1G09210		AT3G12290	AT5G61410	AT5G49900
AT5G10270	AT5G55930	AT1G67330		AT3G02720	ATCG01020	AT1G55690
AT1G33470	AT3G21190	AT3G42725		AT1G24510	AT1G03680	AT1G34550
AT2G26975	AT4G04955	AT4G28400		AT5G49510	AT2G45180	AT5G43860
AT1G75860	AT3G62660	AT4G22780		AT3G25690	AT1G12810	AT1G22180
AT4G01100	AT3G05320	AT4G31520		AT2G27510	AT4G21280	AT2G48030
AT3G51040	AT4G14746	AT3G15358		AT3G10920	AT2G14720	AT4G32730
AT5G26610	AT2G28930	AT1G59870		AT5G20020	AT2G35900	AT1G74320
AT5G40830	AT2G29065	AT1G23840		AT3G15580	AT2G43030	AT3G24520
AT5G13810	AT5G49900	AT2G30250		AT3G51750	AT4G14710	AT2G35920
AT3G18690	AT1G55690	AT4G21980		AT1G64230	ATCG00140	AT2G19460
AT3G47610	AT1G34550	AT4G16860		AT5G66650	AT5G42530	AT4G23950
AT1G76850	AT5G43860	AT2G24570		AT5G08120	AT3G58170	AT5G54670
AT3G55980	AT1G22180	AT1G51700		AT4G22150	AT3G62290	AT4G39270
AT5G11720	AT2G48030	AT1G67970		AT5G67380	AT3G14130	AT1G08800
AT5G58490	AT4G32730	AT4G20830		AT2G40270	AT3G47370	AT2G07050
AT4G14600	AT1G74320	AT5G66630		AT1G49975	AT3G04920	AT1G10690
AT1G01320	AT3G24520	AT3G29140		AT5G20150	AT2G18020	AT2G23360
AT4G30550	AT2G35920	AT4G29900		AT4G33640	AT5G07340	AT1G10410
AT1G65820	AT2G19460	AT3G43840		ATCG00270	AT2G01180	AT1G24160
AT2G46330	AT4G23950	AT5G20830		AT1G01230	AT3G60245	AT5G45940
AT5G51620	AT5G54670	AT3G14950		AT4G30760	AT1G25400	AT4G38900
AT3G51270	AT4G39270	AT3G58780		AT1G05780	AT1G52230	AT3G07570
AT3G57030	AT1G08800	AT1G74840		AT1G77510	AT1G58602	AT5G06670
AT4G13050	AT2G07050	AT5G24110		ATCG00550	AT2G30860	AT2G19450
AT1G03330	AT1G10690	AT2G24790		AT2G44610	AT2G34480	AT5G07290
AT3G12290	AT2G23360	AT3G61898		AT1G63830	AT2G30050	AT2G38440
AT3G02720	AT1G10410	AT5G17150		AT3G01480	AT2G21580	AT2G46225
AT1G24510	AT1G24160	AT1G71040		AT5G27560	AT5G43830	AT1G74740
AT5G49510	AT5G45940	AT5G19140		AT2G31360	AT2G38670	AT1G04990
AT3G25690	AT4G38900	AT1G66970		AT3G11400	AT5G04140	AT5G62960
AT2G27510	AT5G20830	AT1G26260		AT5G52190	AT5G63030	AT3G26744
AT3G10920	AT3G07570	AT1G53710		AT4G38800	AT5G08130	AT5G08640
AT5G20020	AT5G06670	AT5G11970		AT2G20570	AT3G06700	AT1G70430
AT3G15580	AT2G19450	AT5G60680		AT3G06470	AT2G40000	AT1G03770
AT3G51750	AT5G07290	AT1G10340		AT2G31200	AT2G24765	AT5G24270
AT1G64230	AT2G38440	AT4G27230		AT4G02920	AT2G26530	AT4G23880
AT5G66650	AT2G46225	AT5G59790		AT5G02040	AT1G32060	AT5G04820
AT5G08120	AT1G74740	AT3G47250		AT5G24980	AT3G53870	AT3G50845
AT4G22150	AT1G04990	AT1G05570		AT4G27585	AT3G04790	AT4G17680
AT5G67380	AT5G62960	AT5G64340		AT2G03120	AT5G20520	AT2G34340
AT2G40270	AT3G26744	AT2G45880		AT3G60300	AT4G22920	AT5G41900
AT1G49975	AT5G08640	AT5G58120		AT5G46110	AT1G10630	AT5G01040
AT5G20150	AT1G70430	AT4G37640		AT3G49100	AT4G33200	AT4G39210
AT4G33640	AT1G03770	AT1G02530		AT5G16050	AT5G28540	AT1G22060
ATCG00270	AT5G24270	AT5G14270		AT1G68100	AT5G27700	AT1G18330
AT1G01230	AT4G23880	AT2G40020		AT2G17200	AT4G35785	AT2G45590
AT4G30760	AT5G04820	AT5G21090		AT5G40770	AT3G61470	AT5G41060
AT1G05780	AT3G50845	AT5G25250		AT1G15390	AT3G59540	AT4G19120
AT1G77510	AT4G17680	AT2G25900		AT1G78070	AT3G14415	AT4G14750
ATCG00550	AT2G34340	AT5G19280		AT4G39690	AT3G06850	AT3G21250
AT2G44610	AT5G41900	AT4G30940		AT5G56940	AT3G04630	AT4G36210
AT1G63830	AT5G01040	AT2G44290		AT1G75810	AT4G38620	AT1G31290
AT3G01480	AT4G39210			AT3G50800	AT3G55280	AT1G49360
AT5G27560	AT1G22060			AT5G11260	AT3G13845	AT2G43520
AT2G31360	AT1G18330			AT4G29430	AT1G42960	AT4G30470
AT3G11400	AT2G45590			AT2G30060	AT3G60750	AT2G39050
AT5G52190	AT5G41060			AT2G06025	AT5G57560	AT3G53420
AT4G38800	AT4G19120			AT4G36760	AT2G47730	AT4G16130
AT2G20570	AT4G14750			AT3G59990	ATCG00680	AT5G28040
AT3G06470	AT3G21250			AT3G05880	AT1G42970	AT3G61830
AT2G31200	AT4G36210			AT1G08980	ATCG01040	AT5G43060
AT4G02920	AT1G31290			AT3G11830	AT4G14420	AT5G11020
AT5G02040	AT1G49360			AT3G04230	AT1G13790	AT3G55470
AT5G24980	AT2G43520			AT1G01080	ATCG00350	AT3G47730
AT4G27585	AT4G30470			AT4G34150	AT2G35520	AT5G67070
AT2G03120	AT2G39050			AT1G16740	AT5G20630	AT2G46420
AT3G60300	AT3G53420			AT5G67350	AT3G51800	AT1G02080
AT5G46110	AT4G16130			AT1G48790	AT4G27654	AT3G16150
AT3G49100	AT5G28040			AT5G16060	AT5G63320	AT1G12320
AT5G16050	AT3G61830			AT2G24550	AT1G62040	AT2G21540
AT1G68100	AT5G43060			AT3G10860	AT1G14320	AT3G62870
AT2G17200	AT5G11020			AT5G27990	AT3G56910	AT2G35110
AT5G40770	AT3G55470			AT1G36310	AT2G35240	AT2G28740
AT1G15390	AT3G47730			AT4G13010	AT5G38430	AT1G31930
AT1G78070	AT5G67070			AT5G41600	AT5G64350	AT4G32460
AT4G39690	AT2G46420			AT1G22530	AT1G67090	AT5G54800
AT5G56940	AT1G02080			AT3G25545	AT2G17930	AT3G20350
AT1G75810	AT3G16150			AT5G59820	AT2G46280	AT3G52890
AT3G50800	AT1G12320			AT3G46830	AT1G72930	AT5G44110
AT5G11260	AT2G21540			AT5G11750	AT2G47060	AT1G50660
AT4G29430	AT3G62870			AT5G32450	AT4G14716	AT4G28390
AT2G30060	AT2G35110			AT3G19450	AT1G76080	AT5G52280
AT2G06025	AT2G28740			AT1G61870	AT3G57450	AT1G29240
AT4G36760	AT1G31930			AT5G08290	AT1G20340	AT5G16730
AT3G59990	AT4G32460			AT2G28605	ATCG01100	AT3G52770
AT3G05880	AT5G54800			AT5G03030	AT2G39960	AT1G09920
AT1G08980	AT3G20350			AT1G64060	AT1G17440	AT4G39900
AT3G11830	AT3G52890			AT5G21070	AT3G10720	AT5G11090
AT3G04230	AT5G44110			AT3G52400	AT5G17920	AT2G36830
AT1G01080	AT1G50660			AT1G77370	AT5G09650	AT3G54200
AT4G34150	AT4G28390			AT4G15790	AT4G27657	AT1G73390
AT1G16740	AT5G52280			AT1G80520	AT1G65490	AT3G48050
AT5G67350	AT1G29240			AT3G13470	AT5G19220	AT5G08390
AT1G48790	AT5G16730			AT5G48545	ATCG00280	AT2G01600
AT5G16060	AT3G52770			AT1G45050	AT2G01350	AT3G06450
AT2G24550	AT1G09920			AT5G03230	AT3G54760	AT1G20470
AT3G10860	AT4G39900			AT1G80950	AT3G05500	AT4G38350
AT5G27990	AT5G11090			AT3G03160	AT5G66570	AT2G22125
AT1G36310	AT2G36830			AT1G49140	AT1G27695	AT1G25540
AT4G13010	AT3G54200			AT5G42790	AT5G12860	AT3G48460
AT5G41600	AT1G73390			AT5G13190	AT4G17500	AT5G14420
AT1G22530	AT3G48050			AT2G39780	AT4G29060	AT1G30300
AT3G25545	AT5G08390			AT5G57020	AT1G78040	AT3G50900
AT5G59820	AT2G01600			AT3G04560	AT1G31330	AT1G48100
AT3G46830	AT3G06450			AT1G65410	AT1G08380	AT2G02450
AT5G11750	AT1G20470			AT3G62790	AT1G74050	AT3G12020
AT5G32450	AT4G38350			AT3G14050	AT3G45140	AT3G55420
AT3G19450	AT2G22125			AT1G30580	AT1G74560	AT2G20835
AT1G61870	AT1G25540			AT4G00585	AT1G47830	AT5G06440
AT5G08290	AT3G48460			AT5G64400	AT4G24820	AT1G27500
AT2G28605	AT5G14420			AT3G21350	AT3G06680	AT5G12050
AT5G03030	AT1G30300			AT2G26430	AT3G05170	AT5G01730
AT1G64060	AT3G50900			AT2G24860	AT3G48420	AT1G14430
AT5G21070	AT1G48100			AT5G51510	ATCG01060	AT3G23410
AT1G33600	AT2G02450			AT3G01120	AT4G39800	AT2G01460
AT3G52400	AT3G12020			AT1G27310	AT2G23120	AT3G55120
AT1G77370	AT3G55420			AT1G15400	AT5G60390	AT3G53460
AT4G15790	AT2G20835			AT1G15140	AT4G11220	AT1G78050
AT1G80520	AT5G06440			AT2G36220	AT3G61110	AT3G12200
AT3G13470	AT1G27500			AT1G51510	AT2G43550	AT2G29050
AT5G48545	AT5G12050			AT5G42960	AT3G14290	AT3G58800
AT1G45050	AT5G01730			AT5G05140	AT5G07960	AT2G40935
AT5G03230	AT1G14430			AT3G49990	AT1G56510	AT1G71940
AT1G80950	AT3G23410			AT2G42210	AT2G05220	AT2G04880
AT3G03160	AT2G01460			AT2G32480	AT5G62720	AT1G76950
AT1G49140	AT3G55120			AT2G37975	AT2G47960	AT1G12710
AT5G42790	AT3G53460			AT3G48680	AT5G44090	AT4G36860
AT5G13190	AT1G78050			AT2G19340	AT5G66190	AT4G35780
AT2G39780	AT3G12200			AT1G50600	AT5G11450	AT2G39360
AT5G57020	AT2G29050			AT3G55460	AT3G47070	AT2G27190
AT3G04560	AT3G58800			AT1G27390	AT1G32050	AT1G68820
AT1G65410	AT2G40935			AT1G72416	AT2G27860	AT2G19950
AT3G62790	AT1G71940			AT1G49480	AT2G45680	AT2G30990
AT3G14050	AT2G04880			AT3G20820	AT1G61890	AT1G11410
AT1G30580	AT1G76950			AT5G08100	AT1G23310	AT5G02260
AT4G00585	AT1G12710			AT4G34540	AT3G52360	AT3G08680
AT5G64400	AT4G36860			AT1G24560	AT3G12345	AT4G21440
AT3G21350	AT4G35780			AT1G35340	AT5G63570	AT4G32940
AT2G26430	AT2G39360			AT1G04940	AT1G33590	AT5G41140
AT2G24860	AT2G27190			AT5G03455	AT2G22430	AT1G15800
AT5G51510	AT1G68820			AT2G34260	AT1G54580	AT1G48090
AT3G01120	AT2G19950			AT5G10730	AT1G70760	AT2G42780
AT1G27310	AT2G30990			AT3G56490	ATCG00560	AT5G14780
AT1G15400	AT1G11410			AT1G51160	AT3G27430	AT3G26600
AT1G15140	AT5G02260			AT5G54760	AT1G29920	AT2G24040
AT2G36220	AT3G08680			AT5G42100	AT1G22200	AT4G16340
AT1G51510	AT1G73200			AT4G05000	AT1G19210	AT1G06850
AT5G42960	AT4G21440			AT5G58590	AT1G77350	AT3G11330
AT5G05140	AT4G32940			AT4G36420	AT1G70700	AT5G64440
AT3G49990	AT5G41140			AT3G06320	AT2G28910	AT5G62100
AT2G42210	AT1G15800			AT2G27350	AT1G16000	AT5G34940
AT2G32480	AT1G48090			AT5G11280	AT1G64720	AT3G27880
AT2G37975	AT2G42780			AT3G02790	AT1G06200	AT4G19420
AT3G48680	AT5G14780			AT1G32928	AT3G01440	AT1G18080
AT2G19340	AT3G26600			AT3G45780	AT3G25770	AT4G11560
AT1G50600	AT2G24040			AT4G34730	AT2G06520	AT1G14820
AT3G55460	AT4G16340			AT5G02380	AT1G27350	AT4G18730
AT1G27390	AT1G06850			AT2G41010	AT4G24770	AT5G58900
AT1G72416	AT3G11330			AT1G06033	AT4G24190	AT5G02450
AT1G49480	AT5G64440			AT3G53970	AT4G16140	AT1G29470
AT3G20820	AT5G62100			AT3G62260	AT5G41520	AT1G05810
AT5G08100	AT5G34940			AT1G04290	AT3G61190	AT3G58790
AT4G34540	AT5G45110			AT2G16510	AT5G38980	AT1G03070
AT1G24560	AT3G27880			AT4G30845	AT3G51840	AT3G54690
AT1G35340	AT4G19420			AT5G57490	AT2G43090	AT3G23390
AT1G04940	AT1G18080			AT1G48600	ATCG00790	AT1G18730
AT5G03455	AT4G11560			AT4G35450	AT2G25910	AT2G44080
AT2G34260	AT1G14820			AT4G39960	AT1G09340	AT1G14440
AT5G10730	AT4G18730			AT4G28910	AT5G35735	AT5G10960
AT3G56490	AT5G58900			AT3G06310	AT1G19380	AT1G27850
AT1G51160	AT5G02450			AT4G33110	AT1G10200	AT5G17380
AT5G54760	AT1G29470			AT5G51400	AT3G29180	AT1G69270
AT5G42100	AT1G05810			AT1G01730	AT4G32260	AT1G79990
AT4G05000	AT3G58790			AT2G32500	AT2G25450	AT4G21710
AT5G58590	AT1G03070			AT5G52420	AT5G38480	AT1G08470
AT4G36420	AT3G54690			AT1G31800	AT2G38040	AT1G63220
AT3G06320	AT3G23390			AT1G25560	AT3G29240	AT5G24850
AT2G27350	AT1G18730			AT1G06510	AT3G44720	AT5G27150
AT5G11280	AT2G44080			AT1G50450	AT3G01500	AT4G34000
AT3G02790	AT1G14440			AT3G27820	ATCG00770	AT3G63440
AT1G32928	AT5G10960			AT3G23000	AT1G49240	AT3G15350
AT3G45780	AT1G27850			AT5G20080	AT3G22210	AT1G68060
AT4G34730	AT5G17380			AT4G13670	AT2G02100	AT5G47550
AT5G02380	AT1G69270			AT3G27690	AT1G57990	AT3G48060
AT2G41010	AT1G79990			AT4G40045	AT2G33800	AT4G00165
AT1G06033	AT4G21710			AT5G12140	AT2G33580	AT1G70505
AT3G53970	AT1G08470			AT5G12290	ATCG00740	AT1G09420
AT3G62260	AT1G63220			AT5G52100	AT1G74310	AT1G01960
AT1G04290	AT5G24850			AT3G07200	AT4G25640	AT1G26620
AT2G16510	AT5G27150			AT4G16444	AT5G52650	AT4G01026
AT4G30845	AT4G34000			AT2G34770	AT2G20930	AT3G11120
AT5G57490	AT3G63440			AT4G03180	AT4G37300	AT3G45090
AT1G48600	AT3G15350			AT4G19390	AT2G43560	AT4G26270
AT4G35450	AT1G68060			AT1G27300	AT4G03210	AT4G31340
AT4G39960	AT5G47550			AT4G17640	AT2G37970	AT5G27710
AT4G28910	AT3G48060			AT2G19520	AT2G47450	AT4G13170
AT3G06310	AT4G00165			AT5G26360	AT5G54170	AT1G52780
AT4G33110	AT1G70505			AT3G20050	AT5G59850	AT1G80450
AT5G51400	AT1G09420			AT4G39300	AT5G09760	AT5G43403
AT5G49280	AT1G01960			AT4G15880	AT5G22640	AT3G25840
AT1G01730	AT1G26620			AT1G07980	AT3G51000	AT5G40730
AT2G32500	AT4G01026			AT1G75630	AT1G13640	AT5G43930
AT5G52420	AT3G11120			AT4G08980	AT2G16586	AT1G22770
AT1G31800	AT3G45090			AT4G00355	ATCG00160	AT1G05620
AT1G25560	AT4G26270			AT3G15210	AT3G15020	AT5G38840
AT1G06510	AT4G31340			AT2G35635	AT1G21500	AT2G16380
AT1G50450	AT5G27710			AT5G15650	AT1G68600	AT5G65020
AT3G27820	AT4G13170			AT5G65050	AT5G58430	AT5G54200
AT3G23000	AT1G52780			AT5G13710	AT5G59540	AT3G03310
AT5G20080	AT1G80450			AT1G47200	AT2G26080	AT2G40620
AT4G13670	AT5G43403			AT2G42485	AT1G15370	AT5G09510
AT3G27690	AT3G25840			AT5G56170	AT2G44650	AT1G07630
AT4G40045	AT5G40730			AT4G30990	ATCG00180	AT3G51120
AT5G12140	AT5G43930			AT2G40100	AT2G27310	AT5G14610
AT5G12290	AT1G22770			AT3G61080	AT1G48140	AT3G14980
AT5G52100	AT1G05620			AT1G05910	AT1G32990	AT1G56045
AT3G07200	AT5G38840			AT2G36240	AT4G37925	AT5G28050
AT4G16444	AT2G16380			AT3G19000	AT4G34290	AT5G22760
AT2G34770	AT5G65020			AT5G66140	AT1G76090	AT5G66760
AT4G03180	AT5G54200			AT1G07440	AT2G47470	AT5G06970
AT4G19390	AT3G03310			AT5G46790	AT2G26230	AT3G45030
AT1G27300	AT2G40620			AT2G40765	AT2G38310	AT5G63640
AT4G17640	AT5G09510			AT2G35390	AT1G62780	AT1G78800
AT2G19520	AT1G07630			AT5G14105	AT1G78020	AT1G57660
AT5G26360	AT3G51120			AT5G56850	AT3G18710	AT4G25900
AT3G20050	AT5G14610			AT3G28210	AT5G28750	AT4G19640
AT4G39300	AT3G14980			AT2G23780	AT3G52470	AT3G43300
AT4G15880	AT1G56045			AT1G70780	AT3G21070	AT3G51240
AT1G07980	AT5G28050			AT4G10610	AT5G59730	AT5G64070
AT1G75630	AT5G22760			AT1G67250	AT3G11250	AT5G48250
AT4G08980	AT5G66760			AT1G18720	AT5G48540	AT1G55860
AT4G00355	AT5G06970			AT1G51090	AT1G62750	AT3G04120
AT3G15210	AT3G45030			AT5G53580	AT3G21200	AT3G03810
AT2G35635	AT5G63640			AT5G47870	AT2G45740	AT5G10650
AT5G15650	AT1G78800			AT3G23400	ATCG00630	AT5G06530
AT5G65050	AT1G57660			AT2G36320	AT2G24060	AT5G64510
AT5G13710	AT4G25900			AT3G46010	ATCG00820	AT3G02875
AT1G47200	AT4G19640			AT4G33500	AT5G20230	AT3G63150
AT2G42485	AT3G43300			AT1G12110	AT3G13310	AT1G54217
AT5G56170	AT3G51240			AT5G53000	AT3G04840	AT5G50180
AT4G30990	AT5G64070			AT2G37020	AT2G35620	AT1G52310
AT2G40100	AT5G48250			AT3G56010	AT3G59920	AT5G23860
AT3G61080	AT1G55860			AT1G22430	AT3G15110	AT3G57300
AT1G05910	AT3G04120			AT5G54900	AT2G45960	AT3G52105
AT2G36240	AT3G03810			AT1G06690	ATCG01010	AT3G17330
AT3G19000	AT5G10650			AT2G47320	AT5G57170	AT2G20440
AT5G66140	AT5G06530			AT5G55610	AT1G18740	AT1G70895
AT1G07440	AT5G64510			AT1G70200	AT4G12970	AT1G79530
AT5G46790	AT3G02875			AT4G37280	AT5G51010	AT1G05320
AT2G40765	AT3G63150			AT2G18250	AT1G64510	AT4G39200
AT2G35390	AT1G54217			AT1G69740	AT3G55440	AT1G48480
AT5G14105	AT5G50180			AT5G39830	AT1G65040	AT4G00170
AT5G56850	AT1G52310			AT5G44520	AT5G64620	AT5G19730
AT3G28210	AT5G23860			AT4G08230	AT4G34670	AT3G02560
AT2G23780	AT3G57300			AT2G31660	AT5G57290	AT1G01830
AT1G70780	AT3G52105			AT2G39660	AT2G36060	AT4G23730
AT4G10610	AT3G17330			ATCG00670	AT5G23540	AT2G22730
AT1G67250	AT2G20440			AT2G29530	AT2G28950	AT2G36380
AT1G18720	AT1G70895			AT4G33905	AT3G61430	AT1G17620
AT1G51090	AT1G79530			AT1G10040	AT3G14210	AT2G43460
AT5G53580	AT1G05320			AT5G48655	AT3G15850	AT5G55310
AT5G47870	AT4G39200			AT4G13720	AT4G15545	AT1G64200
AT3G23400	AT1G48480			AT1G77440	AT2G44490	AT1G50440
AT1G07000	AT4G00170			AT2G22360	AT5G05060	AT4G10450
AT2G36320	AT5G19730			AT1G61470	AT4G32340	AT4G11280
AT3G46010	AT3G02560			AT1G60550	AT5G20720	AT3G12610
AT4G33500	AT1G01830			AT1G45000	AT5G46860	AT1G79740
AT1G12110	AT4G23730			AT5G12150	AT2G30040	AT3G61630
AT5G53000	AT2G22730			AT2G03680	AT2G35960	AT1G72470
AT2G37020	AT2G36380			AT5G35590	AT1G52280	AT1G10180
AT3G56010	AT1G17620			AT4G13510	AT5G39210	AT3G58700
AT1G22430	AT2G43460			AT3G28670	AT5G58290	AT2G32700
AT5G54900	AT5G55310			AT5G03050	AT2G27530	AT3G54680
AT1G06690	AT1G64200			AT5G19860	AT4G20260	AT3G17940
AT2G47320	AT1G50440			AT1G53560	AT4G29735	AT5G43630
AT5G55610	AT4G10450			AT4G26520	AT1G18650	AT4G11680
AT1G70200	AT4G11280			AT1G68000	AT4G33520	AT2G44120
AT4G37280	AT3G12610			AT3G28370	AT1G67680	AT1G02816
AT2G18250	AT1G79740			AT3G02840	AT3G46780	AT3G53570
AT1G69740	AT3G61630			AT2G39580	AT1G11860	AT1G80460
AT5G39830	AT1G72470			AT4G16155	AT1G05575	AT1G56660
AT5G44520	AT1G10180			AT4G25030	AT1G03475	AT2G44740
AT4G08230	AT3G58700			AT3G52870	AT3G15520	AT4G39710
AT2G31660	AT2G32700			AT2G17300	AT2G42500	AT3G13190
AT2G39660	AT3G54680			AT2G29500	AT2G47710	AT3G24440
ATCG00670	AT3G17940			AT1G75000	AT5G54165	AT5G19370
AT2G29530	AT5G43630			AT5G20570	AT3G53020	AT4G33930
AT4G33905	AT4G11680			AT5G22800	ATCG00730	AT4G20410
AT1G10040	AT2G44120			AT3G23600	AT1G20020	AT1G65060
AT5G48655	AT1G02816			AT1G64520	AT4G01370	AT5G54630
AT4G13720	AT3G53570			AT3G10840	AT3G24830	AT2G36170
AT1G77440	AT1G80460			AT2G23310	AT3G18890	AT1G72700
AT2G22360	AT1G56660			AT3G19760	AT1G72450	AT4G01000
AT1G61470	AT2G44740			AT3G05220	AT5G49480	AT5G64140
AT1G60550	AT4G39710			AT5G56130	AT3G26650	AT1G30000
AT1G45000	AT3G13190			AT1G63290	AT4G31780	AT3G01780
AT5G12150	AT3G24440			AT5G27730	AT5G02160	AT5G47780
AT2G03680	AT5G19370			AT1G49660	AT1G60950	AT5G20620
AT5G35590	AT4G33930			AT4G00370	AT2G39730	AT5G64220
AT4G13510	AT4G20410			AT3G22680	AT3G10520	AT1G64990
AT3G28670	AT1G65060			AT2G46540	AT4G36010	AT3G24840
AT5G03050	AT5G54630			AT4G00490	AT3G55520	AT5G02310
AT5G19860	AT2G36170			AT5G61820	AT2G35830	AT4G14350
AT1G53560	AT1G72700			AT3G12587	AT4G04330	AT2G20990
AT4G26520	AT4G01000			AT3G29170	AT1G10522	AT5G67360
AT1G68000	AT5G64140			AT3G02910	AT3G14600	AT1G26570
AT3G28370	AT1G30000			AT1G09645	AT5G27390	AT3G16060
AT3G02840	AT3G01780			AT2G04842	AT2G30950	AT5G60670
AT2G39580	AT5G47780			AT3G58130	AT2G37600	AT5G60550
AT4G16155	AT5G20620			AT5G41210	AT1G07320	AT2G20450
AT4G25030	AT5G64220			AT1G07650	AT3G15710	AT5G51230
AT3G52870	AT1G64990			AT3G24530	AT3G11630	AT4G12570
AT2G17300	AT3G24840			AT1G64150	AT4G32610	AT1G11905
AT2G29500	AT5G02310			AT2G28400	AT1G30380	AT5G14370
AT1G75000	AT4G14350			AT2G16500	AT5G47640	AT3G48350
AT5G20570	AT2G20990			AT1G32520	ATCG00020	AT5G12250
AT5G22800	AT5G67360			AT4G34830	AT4G28660	AT5G47330
AT3G23600	AT1G26570			AT1G67785	AT3G55330	AT3G10610
AT1G64520	AT3G16060			AT3G48360	AT5G10360	AT1G73460
AT3G10840	AT5G60670			AT2G41905	AT3G10525	AT4G29410
AT2G23310	AT5G60550			AT1G16470	AT1G70600	AT1G64390
AT3G19760	AT2G20450			AT5G04900	AT3G58610	AT3G46200
AT3G05220	AT5G51230			AT3G15395	AT5G39740	AT5G14760
AT5G56130	AT4G12570			AT1G09415	AT2G39390	AT5G14470
AT1G63290	AT1G11905			AT2G40600	AT5G52240	AT5G12350
AT5G27730	AT5G14370			AT3G16850	AT2G01250	AT3G56850
AT1G49660	AT3G48350			AT1G72090	AT5G17670	AT2G28290
AT4G00370	AT5G12250			AT4G34410	AT1G53850	AT3G01460
AT3G22680	AT5G47330			AT4G14965	AT2G37660	AT3G12480
AT2G46540	AT3G10610			AT4G17250	AT2G43910	AT5G51430
AT4G00490	AT1G73460			AT4G20850	AT4G17420	AT3G05590
AT5G61820	AT4G29410			AT3G01520	AT1G51940	AT3G14720
AT3G12587	AT1G64390			AT4G01280	AT4G16980	AT3G11910
AT3G29170	AT3G46200			AT1G69900	AT1G27400	AT3G19640
AT3G02910	AT5G14760			ATCG01180	AT1G33230	AT5G51040
AT1G09645	AT5G14470			AT1G27385	AT3G12580	AT4G31985
AT2G04842	AT5G12350			AT2G37710	AT4G36950	AT1G79690
AT3G58130	AT3G56850			AT2G39140	AT5G16070	AT2G21380
AT5G41210	AT2G28290			AT5G24670	AT5G27430	AT4G35110
AT1G07650	AT3G01460			AT1G15270	AT4G34240	AT3G02260
AT3G24530	AT3G12480			AT5G58060	AT5G55190	AT3G24050
AT1G64150	AT5G51430			AT3G53800	AT5G16030	AT2G38360
AT2G28400	AT3G05590			AT3G12670	AT3G18050	AT4G01060
AT2G16500	AT3G14720			AT1G31540	AT5G52780	ATCG00750
AT1G32520	AT3G11910			AT1G17220	AT1G12800	AT3G27300
AT4G34830	AT3G19640			AT2G46560	AT2G22880	AT2G27200
AT1G67785	AT5G51040			AT1G21670	AT3G09980	AT1G43560
AT3G48360	AT4G31985			AT1G53520	AT5G53560	AT5G53160
AT2G41905	AT1G79690			AT3G60620	AT4G28030	AT1G55320
AT1G16470	AT2G21380			AT2G19350	AT3G01130	AT4G10250
AT5G04900	AT4G35110			AT3G15660	AT5G21274	AT1G78600
AT3G15395	AT3G02260			AT2G16900	AT4G18880	AT1G67400
AT1G09415	AT3G24050			AT4G01870	AT5G14660	AT2G35470
AT2G40600	AT2G38360			AT1G53430	AT1G66680	AT4G25690
AT3G16850	AT4G01060			AT1G59820	AT5G61130	AT2G22795
AT1G72090	ATCG00750			AT3G05350	AT5G53050	AT1G05170
AT4G34410	AT3G27300			AT2G20920	AT2G21170	AT5G49330
AT4G14965	AT2G27200			AT5G57990	AT5G64290	AT4G25830
AT4G17250	AT1G43560			AT4G18440	AT1G19150	AT3G47160
AT4G20850	AT5G53160			AT1G70900	AT5G52440	AT1G47330
AT3G01520	AT1G55320			AT1G78280	AT1G44920	AT1G45160
AT4G01280	AT4G10250			AT4G34090	ATCG00480	AT5G34850
AT1G69900	AT1G78600			AT4G02230	AT1G03220	AT4G05020
ATCG01180	AT1G67400			AT3G20810	AT3G17170	AT3G57220
AT1G27385	AT2G35470			AT1G22920	AT5G01590	AT1G01570
AT2G37710	AT4G25690			AT5G62770	AT5G46420	AT3G62900
AT2G39140	AT2G22795			AT1G17100	AT1G19910	AT5G24350
AT5G24670	AT1G05170			AT3G03050	AT1G70490	AT3G52155
AT1G15270	AT5G49330			AT3G51520	AT1G69295	AT5G10550
AT5G58060	AT4G25830			AT3G23940	AT1G20620	AT3G02360
AT3G53800	AT3G47160			AT5G24060	AT5G64850	AT3G06580
AT3G12670	AT1G47330			AT1G04630	AT3G56460	AT5G46880
AT1G31540	AT1G45160			AT1G66580	AT1G05190	AT5G54650
AT1G17220	AT5G34850			AT2G42330	AT3G08740	AT4G10140
AT2G46560	AT4G05020			AT3G20920	ATCG00430	AT2G46020
AT1G21670	AT3G57220			AT2G24420	AT1G32920	AT4G28770
AT1G53520	AT1G01570			AT5G08040	AT2G25210	AT4G17100
AT3G60620	AT3G62900			AT5G39950	AT2G16660	AT3G43220
AT2G19350	AT5G24350			AT5G04550	AT4G28740	AT1G09570
AT3G15660	AT3G52155			AT1G62180	AT3G47810	AT3G57020
AT2G16900	AT5G10550			AT5G48470	ATCG00810	AT3G54250
AT4G01870	AT3G02360			AT4G13930	ATCG01090	AT4G15180
AT1G53430	AT3G06580			AT5G49020	AT4G24750	AT1G61170
AT1G59820	AT5G46880			AT1G43900	AT1G73080	AT2G28550
AT3G05350	AT5G54650			AT1G10500	AT3G14660	AT2G36290
AT2G23320	AT4G10140			AT5G20650	AT2G44860	AT3G03920
AT2G20920	AT2G46020			AT1G27330	AT1G79850	AT2G16370
AT5G57990	AT4G28770			AT5G54810	AT4G27745	AT3G50360
AT4G18440	AT4G17100			AT3G48000	AT3G52300	AT3G52250
AT1G70900	AT3G43220			AT3G18390	AT4G10340	AT1G32750
AT1G78280	AT1G09570			AT2G46230	AT5G62575	AT1G15520
AT4G34090	AT3G57020			AT5G16260	AT1G70280	AT3G26100
AT4G02230	AT3G54250			AT5G58650	AT1G18060	AT3G13300
AT3G20810	AT4G15180			AT3G51260	AT4G34555	AT5G18190
AT1G22920	AT1G61170			AT5G14800	AT4G19520	AT4G30996
AT5G62770	AT2G28550			AT5G19070	AT1G50732	AT2G07727
AT1G17100	AT2G36290			AT5G05300	AT3G61440	AT5G26770
AT3G03050	AT3G03920			AT1G21190	AT3G50830	AT5G08170
AT3G51520	AT1G04770			AT2G47840	ATCG00580	AT2G15530
AT3G23940	AT2G16370			AT3G06350	AT1G77490	AT1G69850
AT3G47250	AT3G50360			AT1G22740	AT4G34135	AT3G50370
AT5G24060	AT3G52250			AT5G05190	AT3G22235	AT1G10580
AT2G40020	AT1G32750			AT4G34700	AT4G21445	AT5G55600
AT1G04630	AT1G15520			AT1G79600	AT2G26150	AT2G28840
AT1G66580	AT3G26100			AT1G36320	AT1G43670	AT2G18876
AT2G42330	AT3G13300			AT3G17510	AT3G13120	AT4G16515
AT3G20920	AT5G18190			AT2G45770	AT1G10590	AT4G20890
AT2G24420	AT4G30996			AT2G44920	AT3G22120	AT5G20840
AT5G08040	AT2G07727			AT4G13395	AT2G40140	AT3G24100
AT5G39950	AT5G26770			AT4G01360	AT5G10350	AT5G16010
AT5G04550	AT5G08170			AT4G36220	AT1G63840	AT1G53300
AT1G62180	AT2G15530			AT1G18500	AT2G42580	AT5G06390
AT5G48470	AT1G69850			AT1G80030	ATCG00720	AT2G37540
AT4G13930	AT3G50370			AT4G14960	AT3G15840	AT3G03380
AT5G49020	AT1G10580			AT1G20310	AT1G74970	AT3G47600
AT1G43900	AT5G55600			AT3G55070	AT5G04750	AT3G05600
AT1G10500	AT2G28840			AT1G02140	AT2G44870	AT5G53340
AT5G20650	AT2G18876			AT3G02600	AT1G49970	AT3G06400
AT1G27330	AT4G16515			AT2G18160	AT1G15980	AT3G61060
AT5G54810	AT4G20890			AT3G52740	AT5G17870	AT1G26580
AT3G48000	AT5G20840			AT5G42080	AT5G56360	AT3G54210
AT3G18390	AT3G24100			AT3G54300	AT4G33666	AT1G79820
AT2G46230	AT5G16010			AT1G11720	AT2G21390	AT5G05930
AT5G16260	AT1G53300			AT1G14830	AT4G35090	AT3G17850
AT5G58650	AT5G06390			AT3G17700	AT5G11950	AT2G26800
AT3G51260	AT2G37540			AT4G14070	AT1G77610	AT1G52565
AT5G14800	AT3G03380			AT3G43520	AT1G20810	AT1G27150
AT5G19070	AT3G47600			AT1G49950	AT1G14150	AT4G11830
AT5G05300	AT3G05600			AT2G02800	AT1G06760	AT3G12810
AT1G21190	AT5G53340			AT2G04030	AT3G50685	AT1G54385
AT2G47840	AT3G06400			AT5G62390	AT1G27530	AT1G08040
AT3G06350	AT3G61060			AT3G13490	AT5G17230	AT3G48980
AT1G22740	AT1G26580			AT5G18400	AT1G44575	AT5G55280
AT5G05190	AT3G54210			AT5G45490	AT1G67740	AT3G49590
AT4G34700	AT1G79820			AT4G27760	AT5G04800	AT1G77220
AT1G79600	AT5G05930			AT4G16890	AT4G17730	AT1G06890
AT1G36320	AT3G17850			AT5G11150	AT5G08050	AT4G08810
AT3G17510	AT2G26800			AT4G31530	AT5G27670	AT5G08660
AT2G45770	AT1G52565			AT5G25930	AT2G37190	AT2G47600
AT2G44920	AT1G27150			AT4G17245	AT5G22440	AT3G59290
AT4G13395	AT4G11830			AT3G50670	AT3G18950	AT2G35760
AT4G01360	AT3G12810			AT4G34460	AT2G03550	AT1G76580
AT4G36220	AT1G54385			AT5G41685	AT3G10405	AT5G03850
AT1G18500	AT1G08040			AT5G07580	AT1G01140	AT3G28030
AT1G80030	AT3G48980			AT5G46410	AT3G51730	AT1G17210
AT4G14960	AT5G55280			AT1G02400	AT5G51110	AT5G04560
AT1G20310	AT3G49590			AT3G02190	AT2G21280	AT5G65220
AT3G55070	AT1G77220			AT5G01020	AT4G34490	AT2G39480
AT1G02140	AT1G06890			ATCG00510	AT5G52640	AT4G35920
AT3G02600	AT4G08810			AT4G26860	AT5G44580	AT1G06870
AT2G18160	AT5G08660			AT1G80860	AT1G75350	AT5G15350
AT3G52740	AT2G47600			AT1G03250	AT2G41940	AT1G76940
AT5G42080	AT3G59290			AT2G37450	AT1G08640	AT1G08920
AT3G54300	AT2G35760			AT3G02200	AT3G52800	AT1G68585
AT1G11720	AT1G76580			AT3G04620	AT5G52050	AT3G58110
AT1G14830	AT5G03850			AT5G64080	AT1G80750	AT5G11040
AT3G17700	AT3G28030			AT5G64050	AT4G17615	AT4G23870
AT4G14070	AT1G17210			AT1G08465	AT5G05580	AT5G55220
AT3G43520	AT5G04560			AT1G07150	AT2G28305	AT2G44940
AT1G49950	AT5G65220			AT1G60590	AT3G54050	AT1G20960
AT2G02800	AT2G39480			AT3G52500	AT5G10750	AT3G28710
AT2G04030	AT4G35920			AT1G71000	AT5G65310	AT4G28050
AT5G62390	AT1G06870			AT4G37980	AT4G23190	AT1G73680
AT3G13490	AT5G15350			AT1G67470	AT5G06690	AT1G08620
AT5G18400	AT1G76940			AT1G07140	AT3G46430	AT2G32180
AT5G45490	AT1G08920			AT5G19151	AT3G26060	AT5G62350
AT4G27760	AT1G68585			AT4G26300	AT5G36160	AT5G03080
AT4G16890	AT3G58110			AT1G17340	AT1G65010	AT4G12020
AT5G11150	AT5G11040			AT3G01160	AT1G66090	AT1G05120
AT4G31530	AT4G23870			AT5G66470	AT1G75460	AT3G60480
AT5G25930	AT5G55220			AT2G26550	AT4G34870	AT3G02350
AT4G17245	AT2G44940			AT5G35220	AT1G51070	AT1G31180
AT3G50670	AT1G20960			AT1G17090	AT2G39470	AT4G27180
AT4G34460	AT3G28710			AT1G76070	AT1G43170	AT4G00800
AT5G41685	AT4G28050			AT2G30390	AT3G18740	AT2G23985
AT5G07580	AT1G73680			AT3G02450	AT4G23060	AT1G66340
AT5G46410	AT1G08620			AT3G56880	AT2G19830	AT1G26880
AT1G02400	AT2G32180			AT1G19310	AT3G60820	AT1G63740
AT3G02190	AT5G62350			AT1G71720	ATCG01110	AT4G31860
AT5G01020	AT5G03080			AT5G50250	AT5G59880	AT3G17020
ATCG00510	AT2G45880			AT5G63135	AT2G28800	AT3G08690
AT4G26860	AT4G12020			AT3G24190	AT4G11380	AT1G04440
AT1G80860	AT1G05120			AT5G04170	AT1G52342	AT2G32765
AT3G44735	AT3G60480			AT5G24030	AT1G06680	AT1G03950
AT1G03250	AT3G02350			AT1G79010	AT1G51650	AT4G30340
AT2G37450	AT1G31180			AT1G63260	AT2G38870	AT3G28730
AT3G02200	AT4G27180			AT5G15970	AT5G16830	AT5G51200
AT3G04620	AT4G00800			AT1G08540	AT5G02240	AT1G21170
AT5G64080	AT2G23985			AT2G30260	ATMG00060	AT5G41910
AT5G64050	AT1G66340			AT3G28220	AT5G64260	AT4G31000
AT1G08465	AT1G26880			AT4G25100	AT1G08550	AT2G31945
AT1G07150	AT1G63740			AT2G40095	AT2G26740	AT4G38100
AT1G60590	AT4G31860			AT2G01060	AT4G35730	AT1G07670
AT3G52500	AT3G17020			AT4G31290	AT2G30570	AT5G65810
AT1G71000	AT3G08690			ATMG01080	AT5G26742	AT2G17787
AT4G37980	AT1G04440			AT3G60340	AT1G72370	AT1G11910
AT1G67470	AT2G32765			AT1G76110	AT5G01530	AT1G80980
AT1G07140	AT1G03950			AT2G25840	AT3G52380	AT4G25890
AT5G19151	AT4G30340			AT1G13060	AT3G60370	AT2G02050
AT4G26300	AT3G28730			AT5G26820	AT1G55480	AT2G13610
AT1G17340	AT5G51200			AT3G16000	AT1G32220	AT1G77680
AT3G01160	AT1G21170			AT1G56190	AT1G32070	AT2G28200
AT5G66470	AT5G41910			AT5G13630	AT4G14870	AT5G02800
AT2G26550	AT4G31000			AT5G62640	AT2G28000	AT4G27595
AT5G35220	AT2G31945			AT1G25220	AT5G02940	AT1G28200
AT1G17090	AT4G38100			AT1G78240	AT1G03630	AT2G47230
AT1G76070	AT1G07670			AT1G79380	AT5G22650	AT4G37820
AT2G30390	AT5G65810			AT2G02860	AT5G41050	AT5G55630
AT3G02450	AT2G17787			AT5G14060	AT3G21150	AT5G07300
AT3G56880	AT1G11910			AT5G47840	AT2G20560	AT2G27900
AT1G19310	AT1G80980			AT5G19230	AT1G27730	AT1G23710
AT1G71720	AT4G25890			AT3G45850	AT4G38160	AT2G44680
AT5G50250	AT2G02050			AT1G71130	AT3G26900	AT1G03600
AT5G63135	AT2G13610			AT1G32700	AT4G28080	AT4G19490
AT3G24190	AT1G77680			AT1G73660	AT4G31820	AT4G01290
AT5G04170	AT2G28200			AT4G11630	ATCG00220	AT4G28640
AT5G24030	AT5G02800			AT3G13510	AT1G19020	AT4G11920
AT1G79010	AT4G27595			AT4G25230	AT4G11175	AT1G23870
AT1G63260	AT3G07360			AT4G01800	AT3G19810	AT1G18540
AT5G15970	AT4G29900			AT4G35230	AT2G30695	AT5G38470
AT1G08540	AT1G28200			AT1G18170	AT1G15780	AT1G53570
AT2G30260	AT2G47230			AT3G08580	AT5G62140	AT5G67320
AT3G28220	AT4G37820			AT2G02180	AT1G74880	AT3G11130
AT4G25100	AT5G55630			AT5G64580	AT5G19050	AT3G49810
AT2G40095	AT5G07300			AT2G16940	AT2G36990	AT1G05960
AT2G01060	AT2G27900			AT2G22910	AT1G48030	AT2G14255
AT4G31290	AT1G23710			AT5G52920	AT4G32130	AT1G12470
ATMG01080	AT2G44680			AT1G23360	AT2G01008	AT5G02870
AT3G60340	AT1G03600			AT4G33080	AT4G22750	AT2G42740
AT1G76110	AT4G19490			AT5G58720	AT1G32470	AT1G29250
AT2G25840	AT4G01290			AT5G06130	AT5G23740	AT1G24170
AT1G13060	AT4G28640			AT4G30720	AT3G09350	AT4G16310
AT5G26820	AT4G11920			AT3G20410	AT5G54980	AT1G01220
AT3G16000	AT1G23870			AT1G67080	AT2G24090	AT4G08350
AT1G51700	AT1G18540			AT2G41140	AT2G38230	AT5G39500
AT1G56190	AT4G14365			AT1G76860	AT5G61790	AT5G52560
AT5G13630	AT5G38470			AT5G20140	AT3G19170	AT1G55325
AT5G62640	AT1G53570			AT4G22190	AT5G52960	AT1G31850
AT1G25220	AT5G67320			AT4G08390	AT3G17930	AT5G51370
AT1G78240	AT3G11130			AT3G59970	AT3G52880	AT2G06210
AT1G79380	AT3G49810			AT1G03740	AT4G36390	AT4G38680
AT2G02860	AT1G05960			AT2G29510	AT5G13410	AT1G08600
AT5G14060	AT2G14255			AT1G48410	ATCG00530	AT5G37670
AT5G47840	AT1G12470			AT3G61600	AT5G35630	AT1G32130
AT5G19230	AT5G02870			AT5G65920	AT5G20120	AT1G08580
AT3G45850	AT2G42740			AT1G09970	ATCG00760	AT3G12510
AT1G71130	AT1G29250			AT2G35940	AT1G67360	AT1G30630
AT1G32700	AT1G24170			AT2G07715	AT5G40160	AT1G11700
AT1G73660	AT4G16310			AT2G37480	AT3G28860	AT1G21630
AT3G59310	AT1G01220			AT5G16910	AT1G17650	AT5G49430
AT4G11630	AT4G08350			AT4G01995	AT5G11670	AT1G28395
AT5G58120	AT5G39500			AT5G08610	AT1G10960	AT5G59290
AT3G13510	AT5G52560			AT4G32551	AT1G76180	AT5G58340
AT4G25230	AT1G55325			AT5G39785	ATCG00780	AT3G28180
AT4G01800	AT1G31850			AT5G18140	AT1G21000	AT5G63905
AT4G35230	AT5G51370			AT3G26510	AT2G20340	AT5G65110
AT1G18170	AT2G06210			AT1G10940	AT2G20890	AT3G48115
AT3G08580	AT4G38680			AT3G01340	AT5G20280	AT3G19850
AT2G02180	AT1G08600			AT2G21530	AT2G32150	AT4G12600
AT5G64580	AT5G37670			ATCG00360	AT1G14345	AT3G27740
AT2G16940	AT1G32130			AT3G06080	AT3G22231	AT1G24180
AT2G22910	AT1G08580			AT5G20890	AT1G74670	AT1G52220
AT5G52920	AT3G12510			AT1G76405	AT1G52740	AT2G27950
AT1G23360	AT1G30630			AT1G80780	AT4G35410	AT5G42420
AT4G33080	AT1G11700			AT5G59970	AT2G47400	AT1G68670
AT5G58720	AT1G21630			AT4G05631	AT1G16880	AT1G05835
AT5G06130	AT5G49430			AT3G42170	AT2G21870	AT2G34650
AT4G30720	AT1G28395			AT5G48335	AT5G54770	AT5G62865
AT3G20410	AT5G59290			AT3G57320	AT2G33470	AT4G27780
AT1G67080	AT5G58340			AT4G23100	AT1G50670	AT4G19660
AT5G48380	AT3G28180			AT1G75770	AT5G19510	AT5G13500
AT2G41140	AT5G63905			AT3G07320	AT4G02080	AT1G51450
AT1G76860	AT5G65110			AT3G55880	AT1G69252	AT3G47590
AT5G20140	AT3G48115			AT3G47800	AT5G60540	AT3G54860
AT4G22190	AT3G19850			AT3G19830	AT1G01720	AT4G33220
AT4G08390	AT4G12600			AT1G53120	AT1G01790	AT5G64500
AT3G59970	AT3G27740			AT1G56520	AT5G61170	AT3G06150
AT1G03740	AT1G24180			AT4G36900	AT2G22425	AT1G05150
AT2G29510	AT1G52220			AT1G23440	AT3G43540	AT4G23710
AT1G48410	AT2G27950			AT1G01490	AT3G52920	AT1G04120
AT3G61600	AT5G42420			AT1G30440	AT1G22450	AT2G44040
AT5G65920	AT1G68670			AT1G16670	AT3G63490	AT5G24430
AT1G09970	AT1G05835			AT1G06960	AT3G52090	AT1G03290
AT2G35940	AT2G34650			AT1G79440	AT3G25520	AT1G78880
AT2G07715	AT5G62865			AT1G22850	AT5G19750	AT5G12400
AT2G37480	AT4G27780			AT1G72950	AT4G18700	AT1G59890
AT5G16910	AT4G19660			AT1G25390	AT4G01050	AT3G19030
AT4G01995	AT5G13500			AT1G35420	AT3G29075	AT2G22240
AT5G08610	AT1G51450			AT2G31070	AT1G07420	AT3G07890
AT4G32551	AT3G47590			AT5G37360	AT5G08260	AT1G19730
AT5G39785	AT3G54860			AT4G02195	AT3G13410	AT1G07990
AT5G18140	AT4G33220			AT4G31300	AT3G05625	AT5G17710
AT3G26510	AT5G64500			AT5G62790	AT3G08030	AT1G09794
AT1G10940	AT3G06150			AT1G28670	AT4G32530	AT4G19170
AT3G01340	AT1G05150			AT1G71520	AT2G41530	AT2G40080
AT2G21530	AT4G23710			AT5G66850	AT3G15730	AT5G47540
ATCG00360	AT1G04120			AT2G14910	AT2G42530	AT5G02270
AT3G06080	AT2G44040			AT2G34310	AT2G29290	AT5G23890
AT5G20890	AT5G24430			AT4G29070	AT1G78995	AT3G17130
AT1G76405	AT1G03290			AT5G58800	AT2G47170	AT2G47520
AT1G80780	AT1G78880			AT2G21960	AT4G36530	AT3G56800
AT5G59970	AT5G12400			AT2G30740	AT5G28060	AT4G33680
AT4G05631	AT1G59890			AT2G14045	AT1G16030	AT1G05890
AT3G42170	AT3G19030			AT2G20610	ATCG00300	AT3G52100
AT5G48335	AT2G22240			AT2G35860	AT4G00430	AT4G22350
AT3G57320	AT3G07890			AT3G26910	AT1G68010	AT3G55950
AT4G23100	AT1G19730			AT4G17170	AT2G45470	AT4G33440
AT1G75770	AT1G07990			AT1G11310	AT5G67370	AT1G08680
AT3G07320	AT5G17710			AT3G05580	AT3G46030	AT1G27290
AT3G55880	AT1G09794			AT2G07777	AT4G18370	AT1G73790
AT3G47800	AT4G19170			AT4G37610	AT2G20960	AT4G28706
AT3G19830	AT2G40080			AT5G15320	AT1G23205	AT1G07070
AT1G53120	AT5G47540			AT1G01650	AT5G17000	AT1G73960
AT1G56520	AT5G02270			AT5G24930	AT1G56070	AT1G26830
AT4G36900	AT5G23890			AT1G48850	ATCG00640	AT4G36195
AT1G23440	AT3G17130			AT1G35516	AT4G16520	AT2G32320
AT1G01490	AT2G47520			AT3G12120	AT5G05410	AT2G23930
AT1G30440	AT3G56800			AT5G22340	AT1G04410	AT5G26667
AT1G16670	AT4G33680			AT3G24170	AT3G15900	AT3G06650
AT1G06960	AT1G05890			AT5G04810	AT5G45550	AT1G60070
AT1G79440	AT3G52100			AT2G41560	AT1G12845	AT5G60450
AT1G22850	AT4G22350			AT3G54480	AT3G62550	AT1G75380
AT1G72950	AT3G55950			AT1G48330	AT1G45145	AT1G07040
AT1G25390	AT4G33440			AT5G27420	AT5G26030	AT1G02990
AT1G35420	AT1G08680			AT2G47070	AT2G46240	AT5G65460
AT2G31070	AT1G27290			AT5G46470	AT5G47690	AT1G15020
AT5G37360	AT1G73790			AT5G49160	AT2G29960	AT5G64160
AT4G02195	AT4G28706			AT4G10120	AT5G58140	AT1G20980
AT4G31300	AT1G07070			AT2G35450	AT5G39510	AT4G12780
AT5G62790	AT1G73960			AT3G13040	AT1G12000	AT3G09630
AT1G28670	AT1G26830			AT1G53230	AT1G08880	AT2G32810
AT1G71520	AT4G36195			AT2G37630	AT3G18080	ENSRNA049
AT5G66850	AT2G32320			AT4G37510	AT5G13650	AT5G18650
AT2G14910	AT2G23930			AT3G46100	AT3G08720	AT3G55600
AT2G34310	AT5G26667			AT2G14080	AT1G55370	AT2G31370
AT4G29070	AT3G06650			AT5G09995	AT3G12080	AT4G26630
AT5G58800	AT1G60070			AT1G10050	ATCG00380	AT1G56300
AT2G21960	AT5G60450			AT1G69750	AT1G15690	AT1G50900
AT2G30740	AT1G75380			AT1G60010	AT3G15190	AT1G13900
AT2G14045	AT1G07040			AT3G26710	AT5G50870	AT2G40190
AT2G20610	AT1G02990			ATCG00330	AT5G03350	AT2G46910
AT2G35860	AT5G65460			AT4G27600	AT4G22220	AT1G26670
AT3G26910	AT1G15020			AT5G53850	AT5G03940	AT5G42140
AT4G17170	AT5G64160			AT5G57180	AT5G16150	AT5G24120
AT1G11310	AT1G20980			AT2G25737	AT3G09830	AT5G51350
AT3G05580	AT4G12780			AT1G53240	AT2G02510	AT3G13772
AT2G07777	AT3G09630			AT4G09350	AT1G80380	AT4G36480
AT4G37610	AT2G32810			AT3G25070	AT1G50740	AT4G33865
AT5G15320	ENSRNA049			AT2G46735	AT5G48570	AT4G30080
AT1G01650	AT5G18650			AT3G14440	AT5G56710	AT1G07810
AT5G24930	AT3G55600			AT3G06510	AT1G64950	AT3G22780
AT1G48850	AT2G31370			AT5G14210	AT5G14320	AT1G04910
AT1G35516	AT4G26630			AT1G05070	AT5G08280	AT1G23260
AT3G12120	AT1G56300			AT3G57785	AT3G23700	AT2G40010
AT1G05675	AT1G50900			AT4G12040	AT3G51660	AT2G46620
AT5G22340	AT1G13900			AT3G47860	AT2G22990	AT5G07860
AT3G24170	AT2G40190			AT1G29670	AT4G12590	AT2G19390
AT5G04810	AT2G46910			AT2G26580	AT5G60860	AT5G63350
AT2G41560	AT1G26670			AT1G02090	AT3G02580	AT2G02790
AT3G54480	AT5G42140			AT5G15220	ATCG00590	AT1G11060
AT1G48330	AT5G24120			AT1G44790	AT5G44650	AT3G17810
AT5G27420	AT5G51350			AT3G22480	AT1G48920	AT3G11230
AT2G47070	AT3G13772			AT1G33810	AT5G02740	AT3G18480
AT5G46470	AT4G36480			AT2G45300	AT4G00895	AT3G19190
AT5G49160	AT4G33865			AT3G15540	AT4G15420	AT1G73480
AT4G10120	AT4G30080			AT1G07660	AT2G32230	AT1G10950
AT2G35450	AT1G07810			AT2G47210	AT2G06850	AT5G11850
AT3G13040	AT3G22780			AT1G54520	AT1G02560	AT3G54010
AT1G53230	AT1G04910			AT2G22010	AT1G05140	AT5G58730
AT2G37630	AT1G23260			AT3G21700	AT1G54050	AT4G39350
AT4G37510	AT2G40010			AT1G27760	ATCG00520	AT1G08060
AT3G46100	AT2G46620			AT5G20950	AT4G08520	AT1G09740
AT2G14080	AT5G07860			AT5G42390	AT1G22630	AT3G07980
AT5G09995	AT2G19390			AT1G49670	AT5G42650	AT5G49720
AT1G10050	AT5G63350			AT5G55120	AT5G63530	AT2G46180
AT1G69750	AT2G02790			AT3G06035	AT1G09100	AT2G01480
AT1G60010	AT1G11060			AT1G67560	AT5G63310	AT5G08520
AT3G26710	AT3G17810			AT1G28490	AT4G03520	AT5G12430
AT2G24570	AT3G11230			AT2G45790	AT4G17600	AT2G43210
ATCG00330	AT3G18480			AT4G33030	AT3G11945	AT3G09440
AT4G27600	AT3G19190			AT1G77090	ATCG00340	AT4G39220
AT5G53850	AT1G73480			AT1G80480	AT3G24430	AT5G18610
AT5G57180	AT1G10950			AT5G62290	AT2G42880	AT3G59840
AT2G25737	AT5G11850			AT2G33250	AT4G09650	AT3G61820
AT2G41180	AT3G54010			AT1G07170	AT1G30360	AT2G01918
AT1G53240	AT5G58730			AT4G36020	AT3G26740	AT1G75370
AT4G09350	AT4G39350			AT1G62390	AT4G34590	AT3G28690
AT3G25070	AT1G08060			AT3G10670	AT3G10410	AT1G76020
AT2G46735	AT1G09740			AT5G25520	AT2G21290	AT2G25430
AT3G14440	AT3G07980			AT2G17265	AT4G33920	AT5G52550
AT3G06510	AT5G49720			AT1G73920	AT3G04640	AT3G26670
AT5G14210	AT2G46180			AT5G01600	AT5G48810	AT1G80560
AT1G05070	AT2G01480			AT3G59080	AT1G63610	AT5G09820
AT3G57785	AT5G08520			AT1G09950	AT3G06355	AT5G42940
AT4G12040	AT5G12430			AT5G65620	AT1G09560	AT1G68920
AT3G47860	AT2G43210			AT3G07270	AT5G12030	AT1G22882
AT1G29670	AT3G09440			AT2G37620	AT5G62200	AT1G74920
AT2G26580	AT4G39220			AT4G38090	AT4G20870	AT5G17050
AT1G02090	AT5G18610			AT2G18950	AT4G27700	AT5G62090
AT5G15220	AT3G59840			AT3G55250	AT4G33660	AT1G55350
AT1G44790	AT3G61820			AT1G06460	AT3G45930	AT4G38240
AT3G22480	AT2G01918			AT5G52882	AT1G27100	AT3G46040
AT1G33810	AT1G75370			AT3G52840	AT4G00100	AT1G75945
AT2G45300	AT3G28690			AT4G14342	AT5G37780	AT5G23630
AT3G15540	AT1G76020			AT5G48620	AT5G02710	AT4G10730
AT1G07660	AT2G25430			AT3G54660	AT5G41740	AT1G61040
AT2G47210	AT5G52550			AT2G26560	AT1G72920	AT1G34190
AT1G54520	AT3G26670			AT3G22300	AT1G58380	AT1G49010
AT2G22010	AT1G80560			AT5G19760	AT5G66900	AT5G06050
AT3G21700	AT5G09820			AT5G22250	AT2G30766	AT4G22820
AT1G27760	AT5G42940			AT4G30690	AT5G08650	AT5G05690
AT5G20950	AT1G68920			AT5G66052	AT1G44000	AT1G72770
AT5G42390	AT1G22882			AT5G02550	AT5G11650	AT3G17920
AT1G49670	AT1G74920			AT5G62000	AT3G03940	AT3G05210
AT5G55120	AT5G17050			AT1G01950	AT4G04770	AT1G52590
AT3G06035	AT5G62090			AT4G12290	AT5G23310	AT1G14685
AT1G67560	AT1G55350			AT1G74060	AT1G64970	AT5G12850
AT1G28490	AT4G38240			AT2G47940	ATCG00650	AT3G61690
AT2G45790	AT5G64360			AT3G48200	AT4G17560	AT2G41650
AT4G33030	AT3G46040			AT5G47730	AT4G01070	AT3G55770
AT1G77090	AT1G75945			AT5G42850	AT1G04420	AT3G15820
AT1G80480	AT5G23630			AT2G39570	AT5G14730	AT1G66510
AT5G62290	AT4G10730			AT2G36580	AT1G80180	AT5G11430
AT2G33250	AT1G61040			AT5G46910	AT5G67260	AT2G21520
AT1G70520	AT1G34190			AT1G69730	AT1G22590	AT3G18420
AT1G07170	AT1G49010			AT1G15260	AT5G07090	AT4G00450
AT4G36020	AT5G06050			AT1G58030	AT4G27280	AT5G07940
AT1G62390	AT4G22820			AT5G59710	AT2G17380	AT2G27840
AT3G10670	AT5G05690			AT5G03300	AT4G30650	AT2G36310
AT5G25520	AT1G72770			AT2G21370	AT4G18010	AT3G57650
AT2G17265	AT3G17920			AT4G18590	AT5G43460	AT2G01690
AT1G73920	AT3G05210			AT4G12420	AT1G08360	AT3G51370
AT5G01600	AT1G52590			AT1G48520	AT1G19960	AT4G34500
AT3G59080	AT1G14685			AT4G18890	AT1G23290	AT3G52200
AT1G09950	AT5G12850			AT1G32860	AT5G46800	AT1G77260
AT5G65620	AT3G61690			AT3G12830	AT2G44350	AT5G43560
AT3G07270	AT2G41650			AT5G51190	AT5G48580	AT1G59610
AT2G37620	AT3G55770			AT1G02130	AT4G02725	AT3G07760
AT4G38090	AT3G15820			AT1G34750	AT2G40490	AT5G01445
AT2G18950	AT1G66510			AT3G60110	AT4G34050	AT3G08780
AT3G55250	AT5G11430			AT5G55620	AT2G14880	AT4G39680
AT1G06460	AT2G21520			AT5G44060	AT3G08730	AT2G41770
AT5G52882	AT3G18420			AT4G02440	AT1G29070	AT4G13220
AT3G52840	AT4G00450			AT1G53440	AT1G65290	AT5G23900
AT4G14342	AT5G07940			AT1G07110	AT1G66080	AT2G31840
AT5G48620	AT2G27840			AT3G45630	AT5G55180	AT4G32360
AT3G54660	AT2G36310			AT1G79510	AT3G26570	AT5G16270
AT2G26560	AT3G57650			AT5G12470	AT2G18230	AT1G09780
AT3G22300	AT2G01690			AT5G55940	AT5G24490	AT5G24710
AT5G19760	AT3G51370			AT4G23940	AT2G44500	AT3G47680
AT5G22250	AT4G34500			AT3G24160	AT5G63770	AT2G16485
AT4G30690	AT3G52200			AT1G11930	AT3G49780	AT5G45472
AT5G66052	AT1G77260			AT5G55160	AT2G04360	AT5G22360
AT5G02550	AT5G43560			AT2G40660	AT5G20935	AT1G60810
AT5G62000	AT1G59610			AT4G15560	AT1G09640	AT3G02130
AT1G01950	AT3G07760			AT2G24820	AT5G64460	AT1G58520
AT4G12290	AT5G01445			AT3G02880	AT4G36130	AT3G12600
AT1G74060	AT3G08780			AT1G32360	AT3G23170	AT5G08400
AT2G47940	AT4G39680			AT3G62190	AT1G68840	AT5G55910
AT3G48200	AT2G41770			AT3G54880	AT2G36950	AT2G39700
AT5G47730	AT4G13220			AT5G57015	AT5G42030	AT2G29670
AT5G42850	AT5G23900			ATMG00410	AT4G16990	AT1G54340
AT2G39570	AT2G31840			AT5G52530	AT2G41680	AT1G12310
AT2G36580	AT4G32360			AT3G27570	AT1G74730	AT4G18480
AT5G46910	AT5G16270			AT1G55890	AT5G54290	AT2G17695
AT1G69730	AT1G09780			AT3G07670	AT4G08555	AT3G47910
AT1G15260	AT5G24710			AT1G76700	AT1G53210	AT1G09730
AT1G58030	AT3G47680			AT2G46510	AT5G64300	AT3G51500
AT5G59710	AT2G16485			AT5G12230	AT4G20130	AT4G31130
AT1G03730	AT5G45472			AT5G26570	AT5G47200	AT3G17860
AT5G03300	AT5G22360			AT5G12110	AT3G20310	AT1G02870
AT1G31335	AT1G60810			AT4G36990	AT2G18730	AT1G57765
AT3G19680	AT3G02130			AT5G15640	AT3G56290	AT3G04470
AT2G21370	AT1G58520			AT4G33510	AT5G11060	AT3G57340
AT4G18590	AT3G12600			AT3G55960	AT4G13850	AT4G28260
AT4G12420	AT5G08400			AT2G22540	AT4G26530	AT5G40610
AT1G48520	AT5G55910			AT3G19900	AT5G18380	AT1G68140
AT5G02290	AT2G39700			AT5G08060	AT5G11880	AT2G33410
AT4G18890	AT2G29670			AT3G57890	AT2G46370	AT3G14010
AT1G32860	AT1G54340			AT5G13720	AT4G39970	AT2G17760
AT3G12830	AT1G12310			AT5G62020	AT4G28025	AT1G32790
AT5G51190	AT4G18480			AT1G08480	AT3G07195	AT4G26100
AT1G02130	AT2G17695			AT3G16290	AT3G29185	AT2G25320
AT1G34750	AT3G47910			AT3G47836	AT5G11770	AT3G26030
AT3G60110	AT1G09730			AT1G54290	AT4G28750	AT3G47060
AT5G55620	AT3G51500			AT2G18090	AT2G17340	AT4G12650
AT5G44060	AT4G31130			AT5G25630	AT4G22755	AT5G67470
AT4G02440	AT3G17860			AT3G19580	AT5G14910	AT2G15290
AT1G53440	AT1G02870			AT5G58560	AT2G33330	AT2G01100
AT1G07110	AT1G57765			AT4G18240	AT1G70580	AT4G01560
AT3G45630	AT3G04470			AT4G23570	AT1G02910	AT1G15250
AT1G79510	AT3G57340			AT5G12010	AT1G07590	AT1G53670
AT5G12470	AT4G28260			AT4G24280	AT5G50915	AT1G15130
AT5G55940	AT5G40610			AT4G27990	AT5G48790	AT1G54830
AT4G23940	AT1G68140			AT1G44820	AT5G21920	AT1G56280
AT5G21940	AT2G33410			AT5G16400	AT1G71697	AT3G16630
AT3G24160	AT3G14010			AT1G79930	AT1G73110	AT5G44180
AT1G11930	AT4G21740			AT1G02100	AT5G65410	AT2G04230
AT5G55160	AT2G17760			AT1G16810	AT5G18310	AT4G03205
AT2G40660	AT1G32790			AT3G62980	AT3G18780	AT5G40540
AT4G15560	AT4G26100			AT1G64980	AT4G09010	AT5G09800
AT2G24820	AT2G25320			AT5G63420	AT1G74440	AT1G06230
AT3G02880	AT3G26030			AT5G13850	AT4G37470	AT2G14285
AT1G32360	AT3G47060			AT2G43535	AT4G09150	AT1G27320
AT3G62190	AT4G12650			AT4G13520	AT2G07695	AT5G15680
AT3G54880	AT5G67470			AT4G16950	AT2G27402	AT1G23780
AT5G57015	AT2G15290			AT1G32200	AT1G23190	AT1G78660
ATMG00410	AT2G01100			AT5G24400	AT3G44260	AT1G54170
AT5G52530	AT4G01560			AT5G19990	AT5G21430	AT1G25175
AT3G27570	AT1G15250			AT4G25210	AT1G76450	AT3G23540
AT1G55890	AT1G53670			AT1G78870	AT2G23130	AT4G21450
AT3G07670	AT1G15130			AT1G29550	AT4G14400	AT1G10670
AT1G76700	AT1G54830			AT3G27925	AT5G48490	AT2G23460
AT2G46510	AT1G56280			AT1G26560	AT4G34131	AT5G13570
AT5G12230	AT3G16630			AT5G24690	AT3G54890	AT5G47830
AT5G26570	AT5G44180			AT1G16320	AT1G71820	AT2G23450
AT5G12110	AT2G04230			AT3G58830	AT5G43760	AT1G22700
AT4G36990	AT4G03205			AT3G02570	AT3G62650	AT3G02555
AT5G15640	AT5G40540			AT1G28140	AT5G52970	AT3G18370
AT4G33510	AT5G09800			AT2G34660	AT3G26520	AT5G46160
AT3G55960	AT1G06230			AT2G31800	AT2G01590	AT3G13340
AT2G22540	AT2G14285			AT1G50640	AT5G60600	AT5G56760
AT3G19900	AT1G27320			AT3G10985	AT3G14690	AT3G44190
AT5G08060	AT5G15680			AT4G39520	AT2G33730	AT4G28590
AT3G57890	AT1G23780			AT2G42190	AT5G46690	AT4G32660
AT1G19400	AT1G78660			AT4G11010	AT3G28070	AT1G31190
AT5G13720	AT1G54170			AT5G05220	AT1G22300	AT1G22640
AT5G62020	AT1G25175			AT2G20900	AT3G01830	AT5G08450
AT1G08480	AT3G23540			AT5G62840	AT3G12780	AT5G16210
AT3G16290	AT4G21450			AT5G08420	ATCG00440	AT5G23730
AT3G47836	AT1G10670			AT1G11960	AT5G65470	AT4G30100
AT1G54290	AT2G23460			AT4G03110	AT2G36800	AT2G05810
AT2G18090	AT5G13570			AT5G36230	AT3G04830	AT5G04240
AT5G25630	AT5G47830			AT3G49560	AT2G36460	AT4G14950
AT3G19580	AT2G23450			AT4G23010	AT2G36850	AT5G45160
AT5G58560	AT1G22700			AT1G72640	AT2G27710	AT5G11270
AT4G18240	AT3G02555			AT5G28500	AT1G78850	AT1G62740
AT4G23570	AT3G18370			AT1G08520	AT2G33180	AT1G69510
AT5G12010	AT5G46160			AT2G41600	AT2G30410	AT1G12390
AT4G24280	AT3G13340			AT5G52840	AT3G18680	AT1G16890
AT4G27990	AT5G56760			AT5G13000	AT1G07050	AT1G76160
AT1G44820	AT3G44190			AT4G21660	AT3G12980	AT1G72880
AT5G16400	AT4G28590			AT2G04520	AT1G65390	AT1G33240
AT1G79930	AT4G32660			AT5G27760	AT3G22060	AT3G06410
AT1G02100	AT1G31190			AT2G33110	AT3G23530	AT3G23980
AT1G16810	AT1G22640			AT1G21770	AT4G29870	AT5G60620
AT3G62980	AT5G08450			AT1G04080	AT2G42690	AT4G22360
AT1G64980	AT5G16210			AT2G31305	AT2G41640	AT1G11475
AT5G63420	AT5G23730			AT5G62540	AT4G10060	AT1G20010
AT5G13850	AT4G30100			AT1G67920	AT4G16410	AT5G20930
AT2G43535	AT2G05810			AT4G02350	AT1G29530	AT3G61480
AT4G13520	AT5G04240			AT1G06530	AT2G20580	AT3G59110
AT4G16950	AT4G14950			AT3G55020	AT5G49520	AT4G17085
AT1G32200	AT5G45160			AT1G70350	AT2G47930	AT1G75990
AT5G24400	AT5G11270			AT1G15430	AT4G36540	AT1G60860
AT5G19990	AT1G62740			AT4G26130	AT5G38420	AT1G14360
AT4G25210	AT1G69510			AT2G35260	AT1G29880	AT4G28100
AT1G78870	AT1G12390			AT5G15802	AT5G47700	AT2G46390
AT1G29550	AT1G16890			AT4G18810	AT1G68238	AT3G47080
AT3G27925	AT1G76160			AT1G70730	AT5G67250	AT1G58250
AT1G26560	AT1G72880			AT1G77590	AT5G56860	AT5G46210
AT5G24690	AT1G33240			AT1G47380	AT3G12685	AT5G64030
AT1G16320	AT3G06410			AT3G08710	AT5G35530	AT3G50000
AT3G58830	AT3G23980			AT1G47128	AT1G04850	AT3G07810
AT3G02570	AT5G60620			AT2G18710	AT4G29670	AT3G60630
AT1G28140	AT4G22360			AT1G49600	AT1G10650	AT2G37920
AT5G66675	AT1G11475			AT1G12270	AT1G51110	AT5G55090
AT2G34660	AT1G20010			AT2G24180	AT1G24145	AT1G58230
AT2G31800	AT5G20930			AT5G04930	AT3G53180	AT2G39130
AT1G50640	AT3G61480			AT1G77540	AT4G24972	AT2G26780
AT3G10985	AT3G59110			AT1G62430	AT5G40370	AT1G30880
AT4G39520	AT4G17085			AT1G75330	AT5G54600	AT3G03870
AT2G42190	AT1G75990			AT4G35630	AT3G09500	AT1G49740
AT4G11010	AT1G60860			AT4G25650	AT5G47570	AT3G26560
AT5G05220	AT1G14360			AT5G10450	AT1G58360	AT3G07580
AT2G20900	AT4G28100			AT3G19970	AT3G60210	AT4G35830
AT5G62840	AT2G46390			AT4G21110	AT1G74070	AT5G17910
AT5G08420	AT3G47080			AT4G22310	AT4G13100	AT5G35080
AT1G11960	AT1G58250			AT3G59040	AT4G12830	AT2G33585
AT4G03110	AT5G46210			AT2G44160	AT2G42220	AT2G20760
AT5G36230	AT5G64030			AT2G26300	AT4G20780	AT3G50660
AT3G49560	AT3G50000			AT3G44020	AT2G38210	AT1G32500
AT4G23010	AT3G07810			AT3G02770	ATCG00420	AT3G53610
AT1G72640	AT3G60630			AT4G30810	AT2G05070	AT3G03320
AT5G28500	AT2G37920			AT1G65295	AT4G03280	AT5G62530
AT1G08520	AT5G55090			AT1G31160	AT1G69890	AT5G50900
AT2G41600	AT1G58230			AT3G48110	AT1G21680	AT5G35180
AT5G52840	AT2G39130			AT5G22140	AT1G73600	AT4G18600
AT5G13000	AT2G26780			AT3G03710	AT3G16870	AT5G51020
AT4G21660	AT1G30880			AT5G24735	AT3G60770	AT1G68790
AT2G04520	AT3G03870			AT5G24810	AT3G06760	AT4G36140
AT5G27760	AT1G49740			AT3G60190	AT5G43750	AT5G01800
AT2G33110	AT3G26560			AT1G02280	AT5G53420	AT2G03810
AT1G21770	AT3G07580			AT3G10130	AT3G28200	AT2G40590
AT1G04080	AT4G35830			AT1G21065	AT3G14200	AT1G12500
AT2G31305	AT5G17910			AT1G12360	AT2G29180	AT2G48060
AT5G62540	AT5G35080			AT5G42110	AT1G72520	AT4G17530
AT1G67920	AT2G33585			AT1G69830	AT1G58080	AT3G53090
AT4G02350	AT2G20760			AT1G19920	AT1G79040	AT1G79920
AT1G06530	AT3G50660			AT3G57560	AT2G02760	AT3G23830
AT3G55020	AT1G32500			AT1G52870	AT1G61190	AT1G71500
AT1G70350	AT3G53610			AT3G26580	AT1G54820	AT2G04280
AT1G15430	AT3G03320			AT5G56600	AT1G22190	AT5G11490
AT4G26130	AT5G62530			AT3G48560	AT2G18300	AT4G29220
AT1G08450	AT5G50900			AT4G04340	AT3G16080	AT4G37460
AT2G35260	AT5G35180			AT5G20450	AT5G10470	AT4G27670
AT5G15802	AT4G18600			AT4G13495	AT3G07720	AT5G35160
AT4G18810	AT5G51020			AT3G45230	AT2G38540	AT5G18790
AT1G70730	AT1G68790			AT2G07696	AT4G14320	AT1G08660
AT1G77590	AT1G78260			AT1G01090	AT1G30690	AT2G31410
AT1G47380	AT4G36140			AT1G79560	AT5G14700	AT1G49340
AT3G08710	AT5G01800			AT4G35000	AT3G14110	AT3G62360
AT1G47128	AT2G03810			AT2G20280	AT5G47070	AT3G61130
AT2G18710	AT2G40590			AT3G25400	ATMG00070	AT4G12400
AT1G49600	AT1G12500			AT1G17370	AT4G02510	AT4G37330
AT1G12270	AT2G48060			AT3G15530	AT2G39990	AT2G37110
AT2G24180	AT4G17530			AT2G31400	AT4G33050	AT2G18700
AT5G04930	AT3G53090			AT2G04780	AT3G55840	AT5G27970
AT1G77540	AT1G79920			AT3G17770	AT1G65260	AT3G03100
AT1G62430	AT3G23830			AT3G09820	AT3G13750	AT1G48230
AT1G75330	AT1G71500			AT4G27680	AT5G01650	AT1G80040
AT4G35630	AT2G04280			AT5G61380	AT5G10390	AT2G19880
AT4G25650	AT5G11490			AT3G27540	AT3G56650	AT1G55310
AT5G10450	AT4G29220			AT5G03370	AT2G24100	AT5G62210
AT3G19970	AT4G37460			AT2G35120	AT3G46620	AT1G51720
AT4G21110	AT4G27670			AT2G43970	AT1G18210	AT3G06250
AT5G19250	AT5G35160			AT2G21620	AT2G32720	AT3G10370
AT4G22310	AT5G18790			AT3G61640	AT1G10370	AT2G24580
AT1G25550	AT1G08660			AT1G70310	AT1G51805	AT2G30520
AT3G59040	AT2G31410			AT5G19330	AT3G25660	AT2G21410
AT2G44160	AT1G49340			AT3G55360	AT1G73490	AT3G13235
AT2G26300	AT3G62360			AT5G09250	AT4G27800	AT5G55670
AT3G44020	AT3G61130			AT3G13110	AT3G10060	AT2G26890
AT3G02770	AT4G12400			AT1G42550	AT4G13500	AT5G06700
AT4G30810	AT4G37330			AT2G39970	AT5G16710	AT3G18440
AT1G65295	AT2G37110			AT5G10690	AT1G19450	AT3G52040
AT1G31160	AT2G18700			AT1G03160	AT2G47610	AT5G40150
AT3G48110	AT5G27970			AT3G51920	AT3G18820	AT5G43880
AT5G22140	AT3G03100			AT4G12060	AT1G07160	AT1G15100
AT3G03710	AT1G48230			AT1G02500	AT3G47470	AT4G13830
AT5G24735	AT1G80040			AT1G65220	AT1G47130	AT2G44430
AT5G24810	AT2G19880			AT3G01910	AT4G19530	AT1G05540
AT3G60190	AT1G55310			AT3G49640	AT2G44210	AT3G02220
AT1G02280	AT5G62210			AT2G43340	AT4G30210	AT1G79985
AT3G10130	AT1G51720			AT4G13430	AT5G62670	AT2G45440
AT1G21065	AT3G06250			AT5G16715	AT2G15580	AT1G53920
AT1G12360	AT3G10370			AT3G49570	AT3G44110	AT3G09570
AT5G42110	AT2G24580			AT4G23220	AT1G74520	AT1G04210
AT1G69830	AT2G30520			AT5G02500	AT3G05230	AT1G06290
AT1G19920	AT2G21410			AT2G43810	ATCG00150	AT4G02480
AT3G57560	AT3G13235			AT2G46340	AT5G27520	AT4G15475
AT1G52870	AT5G55670			AT3G56860	ATMG00180	AT1G72150
AT3G26580	AT2G26890			AT4G39730	AT1G13260	AT4G17650
AT5G56600	AT1G19330			AT4G38250	AT5G52520	AT1G09140
AT3G48560	AT5G06700			AT5G42740	AT4G16190	AT5G66950
AT4G04340	AT3G18440			AT3G49220	AT4G26370	AT3G09850
AT5G20450	AT3G52040			AT5G65670	AT1G54780	AT3G47890
AT4G13495	AT5G40150			AT2G33855	AT1G37130	AT5G55300
AT3G45230	AT5G43880			AT3G50910	AT4G29390	AT2G20725
AT2G07696	AT1G15100			AT5G64940	AT4G31480	AT1G52930
AT1G01090	AT4G13830			AT1G80410	AT5G24570	AT2G45700
AT1G79560	AT2G44430			AT2G20190	AT3G14840	AT5G23110
AT4G35000	AT1G05540			ATMG00650	AT4G03150	AT5G15930
AT2G20280	AT3G02220			AT5G35170	AT3G28340	AT2G15000
AT3G25400	AT1G79985			AT5G03880	AT5G58770	AT5G07920
AT1G17370	AT2G45440			AT1G17110	AT2G35410	AT1G53310
AT3G15530	AT1G53920			AT4G32520	AT1G73655	AT1G79350
AT2G31400	AT3G09570			AT3G17410	AT5G45680	AT5G48385
AT2G04780	AT1G04210			AT5G63670	AT5G49030	AT2G25760
AT3G17770	AT1G06290			AT5G61220	AT4G35750	AT1G79000
AT3G09820	AT4G02480			AT1G58200	AT3G54400	AT5G57460
AT4G27680	AT4G15475			AT5G53940	AT3G60600	AT2G35605
AT5G61380	AT1G72150			AT4G28480	AT3G11170	AT5G07740
AT3G27540	AT4G17650			AT1G15340	AT1G55210	AT1G31340
AT5G03370	AT1G09140			AT5G01920	AT1G20510	AT2G36835
AT2G35120	AT5G66950			AT2G17220	AT4G38490	AT1G57720
AT2G43970	AT3G09850			AT5G24165	AT2G44130	AT5G09620
AT2G21620	AT3G47890			AT5G16390	AT1G36390	AT1G36980
AT3G61640	AT5G55300			AT1G78680	AT5G57930	AT4G13530
AT1G70310	AT2G20725			AT3G10970	AT5G40950	AT4G02640
AT5G19330	AT1G52930			AT5G14260	AT2G39460	AT3G14310
AT3G55360	AT2G45700			AT1G03910	AT5G52470	AT5G63440
AT5G09250	AT5G23110			AT3G13930	AT2G44840	AT3G11290
AT3G13110	AT5G15930			AT3G13460	AT3G22230	AT1G53400
AT1G42550	AT2G15000			AT5G41700	AT1G70530	AT5G28830
AT2G39970	AT5G07920			AT2G34160	AT3G09200	AT1G11660
AT5G10690	AT1G53310			AT2G20370	AT3G16140	AT2G17972
AT1G03160	AT1G79350			AT3G01810	AT4G16370	AT3G12560
AT3G51920	AT5G48385			AT5G03900	AT4G15080	AT2G40750
AT4G12060	AT2G25760			AT3G26000	AT1G53540	AT2G13370
AT1G02500	AT1G79000			AT4G24370	AT5G48930	AT5G53480
AT1G65220	AT5G57460			AT5G22780	AT1G35160	AT5G42890
AT3G01910	AT2G35605			AT3G07910	AT3G57880	AT3G52580
AT3G49640	AT5G07740			AT4G04610	AT5G67385	AT4G03200
AT2G43340	AT1G31340			AT1G72645	AT3G55450	AT1G30570
AT4G13430	AT2G36835			AT4G21580	AT4G28210	AT2G32900
AT5G16715	AT1G57720			AT4G12790	AT2G03420	AT1G79550
AT3G49570	AT5G09620			AT5G16620	AT1G70420	AT5G38290
AT4G23220	AT1G36980			AT1G67880	AT4G25130	AT5G27120
AT5G02500	AT4G13530			AT1G32640	AT1G65486	AT5G22850
AT2G43810	AT4G02640			AT4G03560	AT1G07400	AT4G12980
AT2G46340	AT3G14310			AT4G00570	AT3G47650	AT3G50590
AT3G56860	AT5G63440			AT1G77080	AT2G47590	AT3G15120
AT4G39730	AT3G11290			AT1G67340	AT3G63410	AT1G27430
AT4G38250	AT1G53400			AT4G32470	AT2G39010	AT4G01690
AT5G42740	AT5G28830			AT1G45230	AT3G08940	AT5G10540
AT3G49220	AT1G11660			AT5G39600	AT1G33120	AT3G16270
AT4G37640	AT2G17972			AT5G64250	AT5G45390	AT3G13224
AT5G65670	AT3G12560			AT5G22450	AT3G53890	AT3G16785
AT2G33855	AT2G40750			AT2G37340	AT2G14835	AT2G25300
AT3G50910	AT2G13370			AT2G21120	AT3G49910	AT1G55840
AT5G64940	AT5G53480			AT2G35040	AT1G48350	AT4G09830
AT1G80410	AT5G42890			AT2G41790	AT3G24503	AT5G65575
AT2G20190	AT3G52580			AT1G14710	AT2G32090	AT3G15060
ATMG00650	AT4G03200			AT4G28470	AT3G25230	AT1G21880
AT5G35170	AT1G30570			AT1G73030	AT1G78620	AT1G31810
AT5G03880	AT2G32900			AT5G54380	AT5G17520	AT1G20580
AT1G17110	AT1G79550			AT1G74380	AT2G30440	AT5G65300
AT3G30720	AT5G38290			AT4G19160	AT5G52210	AT1G26650
AT4G32520	AT5G27120			AT2G44050	AT5G54640	AT1G08820
AT3G17410	AT5G22850			AT1G02660	AT5G42270	AT3G19420
AT5G63670	AT4G12980			AT1G21350	AT4G26670	AT1G63110
AT5G61220	AT3G50590			AT2G41630	AT4G10300	AT4G17140
AT1G58200	AT3G15120			AT2G01850	AT3G25920	AT3G19990
AT5G53940	AT1G27430			AT3G02780	AT3G51880	AT1G16180
AT4G28480	AT4G01690			AT4G02990	AT3G02690	AT4G14455
AT1G15340	AT5G10540			AT4G04040	AT3G47450	AT5G49810
AT5G01920	AT3G16270			AT5G16660	AT3G51450	AT1G77180
AT2G17220	AT3G13224			AT3G23990	AT1G66940	AT3G06420
AT5G24165	AT3G16785			AT3G63500	AT1G69200	AT1G49980
AT5G16390	AT2G25300			AT5G25280	AT3G23570	AT1G77800
AT1G78680	AT1G55840			AT1G51760	AT3G48570	AT5G04420
AT3G10970	AT4G09830			AT1G70410	AT2G35370	AT3G27390
AT5G14260	AT5G65575			AT2G31670	AT4G01130	AT5G15870
AT1G03910	AT3G15060			AT1G64090	AT2G41840	AT4G16650
AT3G13930	AT1G21880			AT1G10760	AT5G03210	AT4G12560
AT3G13460	AT1G31810			AT2G05990	AT1G68440	AT5G14480
AT5G41700	AT1G20580			AT3G49870	AT1G72940	AT3G26950
AT2G34160	AT5G65300			AT5G53860	AT1G64680	AT3G13330
AT2G20370	AT1G26650			AT4G22000	AT3G50240	AT2G03150
AT3G01810	AT1G08820			AT3G63540	AT3G25760	AT2G23520
AT5G03900	AT3G19420			AT5G37850	AT4G23250	AT3G28460
AT3G26000	AT1G63110			AT4G09620	AT3G56020	AT1G16840
AT4G24370	AT4G17140			AT1G01350	AT4G39080	AT4G36920
AT5G22780	AT3G19990			AT2G33590	AT2G34430	AT4G01210
AT3G07910	AT1G16180			AT1G11870	AT4G15248	AT3G08650
AT4G04610	AT4G14455			AT1G49510	AT1G74470	AT3G25805
AT1G72645	AT5G49810			AT1G09750	AT1G72910	AT5G26850
AT4G21580	AT1G77180			AT2G35510	AT2G34420	AT3G55690
AT4G12790	AT3G06420			AT5G14040	AT5G22060	AT3G49470
AT5G16620	AT1G49980			AT3G56680	AT1G30070	AT1G50030
AT1G67880	AT1G77800			AT4G37270	AT3G07780	AT5G08190
AT1G32640	AT5G04420			AT4G11570	AT1G78830	AT4G03960
AT4G03560	AT3G27390			AT4G34200	AT4G12390	AT1G08510
AT4G00570	AT5G15870			AT2G33220	AT4G01310	AT1G69220
AT1G77080	AT4G16650			AT3G53730	AT4G02530	AT1G30810
AT1G67340	AT4G12560			AT1G76050	AT1G24267	AT5G03280
AT4G32470	AT5G14480			AT1G74640	AT3G04550	AT3G13200
AT1G45230	AT3G26950			AT1G56200	AT1G78080	AT1G48420
AT5G39600	AT3G13330			AT5G43960	AT2G27260	AT3G06860
AT5G64250	AT2G03150			AT1G67060	AT2G29420	AT4G33140
AT5G22450	AT2G23520			AT4G36800	AT5G23120	AT3G51620
AT2G37340	AT3G28460			AT2G25970	AT1G06000	AT3G13580
AT2G21120	AT1G16840			AT4G33985	AT3G52150	AT2G18740
AT2G35040	AT4G36920			AT4G36780	AT5G45630	AT4G25630
AT2G41790	AT4G01210			AT4G18390	AT1G66200	AT1G65700
AT1G14710	AT3G08650			AT1G21980	AT4G34450	AT5G03290
AT4G28470	AT3G25805			AT2G30170	AT2G42310	AT3G54560
AT1G73030	AT5G26850			AT1G30620	AT4G37830	AT1G14330
AT5G54380	AT3G55690			AT5G05200	AT3G50260	AT2G47380
AT1G74380	AT3G49470			AT4G32150	AT2G47140	AT1G01940
AT4G19160	AT1G50030			AT4G17410	AT5G13140	AT2G39090
AT2G44050	AT5G08190			AT1G77122	AT4G08870	AT3G56370
AT1G02660	AT4G03960			AT1G08490	AT5G55710	AT5G43430
AT1G21350	AT1G08510			AT3G24180	AT2G27500	AT2G45990
AT2G41630	AT1G69220			AT5G53170	AT1G52300	AT2G11890
AT2G01850	AT1G30810			AT1G47420	AT1G12250	AT1G20220
AT3G02780	AT5G03280			AT1G51690	AT3G55630	AT4G24680
AT4G02990	AT3G13200			AT5G60410	AT2G39650	AT3G01820
AT4G04040	AT1G48420			AT3G01210	AT5G55400	AT1G25570
AT5G16660	AT3G06860			AT3G44620	AT1G77060	AT1G31860
AT3G23990	AT4G33140			AT2G43410	AT2G18440	AT5G37370
AT3G63500	AT3G51620			AT4G34265	AT1G64750	AT5G26760
AT5G25280	AT3G13580			AT5G55210	AT3G11020	AT4G21810
AT1G51760	AT2G18740			AT1G21580	AT1G22160	AT5G12210
AT1G70410	AT4G25630			AT2G30490	AT3G48730	AT3G13275
AT2G31670	AT1G65700			AT5G64840	AT4G01150	AT5G15960
AT1G64090	AT5G03290			AT1G15200	AT4G29040	AT3G49390
AT1G10760	AT3G54560			AT1G78915	AT1G55670	AT4G24520
AT2G05990	AT1G14330			AT5G12040	AT2G20420	AT5G59840
AT3G49870	AT2G47380			AT2G22670	AT5G57710	AT2G17800
AT5G53860	AT1G01940			AT1G13390	AT4G00180	AT5G13110
AT4G22000	AT2G39090			AT4G16500	AT1G56140	AT4G34640
AT3G63540	AT3G56370			AT1G32460	AT5G20900	AT2G03440
AT5G37850	AT5G43430			AT1G21080	AT5G04340	AT4G01395
AT4G09620	AT2G45990			AT1G52670	AT1G55490	AT4G02380
AT1G01350	AT2G11890			AT3G52990	AT5G18660	AT1G55805
AT2G33590	AT1G20220			AT2G27030	AT3G25250	AT5G49570
AT1G11870	AT5G19280			AT5G44340	AT5G66530	AT2G42910
AT1G49510	AT4G24680			AT1G78670	AT1G54460	AT1G29980
AT1G09750	AT3G01820			AT3G22960	AT5G57655	AT2G22480
AT2G35510	AT1G25570			AT3G58680	AT4G34710	AT5G47100
AT5G14040	AT1G31860			AT1G02270	AT1G19670	AT5G63880
AT3G56680	AT5G37370			AT5G59610	AT2G27290	AT5G50020
AT4G37270	AT5G26760			AT5G11170	AT3G59980	AT2G42030
AT4G11570	AT4G21810			AT2G04530	AT1G47580	ATCG00190
AT4G34200	AT5G12210			AT4G19100	AT4G27500	AT2G17530
AT2G33220	AT3G13275			AT4G34180	AT3G06050	AT1G10850
AT3G53730	AT5G15960			AT4G29130	AT4G38950	AT3G06060
AT1G76050	AT3G49390			AT2G30970	AT2G26500	AT5G61020
AT1G74640	AT4G24520			AT1G03370	AT5G59690	AT5G22050
AT1G56200	AT5G59840			AT1G05100	AT5G13220	AT1G31730
AT5G43960	AT2G17800			AT3G54020	AT3G23820	AT5G64180
AT1G67060	AT5G13110			AT2G46490	AT4G01850	AT2G45540
AT4G36800	AT2G30250			AT4G26710	AT4G37040	AT3G20010
AT2G25970	AT4G34640			AT4G19830	AT4G26555	AT1G11480
AT4G33985	AT2G03440			AT3G57470	AT1G12410	AT1G23900
AT4G36780	AT4G01395			AT4G30490	AT5G54720	AT1G55270
AT4G18390	AT4G02380			AT4G27960	AT4G34950	AT1G13190
AT1G21980	AT1G55805			AT3G20060	AT4G02890	AT5G59950
AT2G30170	AT5G49570			AT3G07230	AT2G07708	AT1G23490
AT1G30620	AT2G42910			AT3G47520	AT1G28420	AT5G42990
AT5G05200	AT1G29980			AT4G00300	AT1G65980	AT1G28150
AT4G32150	AT2G22480			AT1G65560	AT2G37270	AT1G51630
AT4G17410	AT5G47100			AT5G53140	AT1G51400	AT3G15410
AT1G77122	AT5G63880			AT5G11480	AT4G09550	AT1G24350
AT1G08490	AT5G50020			AT5G27640	AT5G59613	AT4G26400
AT3G24180	AT2G42030			AT5G46840	AT1G27450	AT5G05010
AT5G53170	ATCG00190			AT4G23650	AT4G21870	AT4G38470
AT1G47420	AT2G17530			AT5G55230	AT2G35490	AT3G18035
AT1G51690	AT1G10850			AT1G22140	AT1G50020	AT5G03760
AT5G60410	AT3G06060			AT3G09900	AT1G51680	AT1G80920
AT3G01210	AT5G61020			AT4G04350	AT2G35500	AT1G50500
AT3G44620	AT5G22050			AT5G26110	AT5G27770	AT5G06120
AT2G43410	AT1G31730			AT3G49670	AT4G13250	AT3G15470
AT4G34265	AT5G64180			AT1G29390	AT4G32060	AT1G15950
AT5G55210	AT2G45540			AT5G57040	AT4G40040	AT5G67420
AT1G21580	AT3G20010			AT5G15090	AT4G20760	AT5G11560
AT2G30490	AT1G11480			AT5G19780	AT5G52060	AT1G19430
AT5G64840	AT1G23900			AT1G63680	AT5G47500	AT1G21930
AT1G15200	AT1G55270			AT2G34560	AT4G26760	AT4G17670
AT1G78915	AT1G13190			AT1G11650	AT4G14800	AT5G46430
AT5G12040	AT5G59950			AT4G10970	AT1G31690	AT4G23640
AT2G22670	AT1G23490			AT2G30870	AT1G69420	AT3G11200
AT1G13390	AT5G42990			AT5G09225	AT1G14400	AT1G15240
AT4G16500	AT1G28150				AT2G41160	AT4G34215
AT1G32460	AT1G51630				AT1G08200	AT2G17790
AT1G21080	AT3G15410				AT1G59860	AT3G55830
AT1G52670	AT1G24350				AT3G59780	AT4G33160
AT3G52990	AT4G26400				AT1G55680	AT5G67490
AT2G27030	AT5G05010				AT4G32285	AT1G64355
AT5G44340	AT4G38470				AT1G67700	AT3G53670
AT1G78670	AT3G18035				AT3G02080	AT1G72680
AT3G22960	AT5G03760				AT2G23090	AT5G01830
AT3G58680	AT1G80920				AT5G09590	AT1G75080
AT1G02270	AT1G50500				AT4G36550	AT2G01270
AT5G59610	AT5G06120				AT5G03345	AT3G27050
AT5G11170	AT3G15470				AT2G32970	AT3G22530
AT2G04530	AT1G15950				AT1G53170	AT3G23280
AT4G19100	AT5G67420				AT2G07687	AT5G08710
AT4G34180	AT5G11560				AT1G61570	AT2G32910
AT4G29130	AT1G19430				AT5G63370	AT5G46780
AT2G30970	AT1G21930				AT5G12020	AT2G07671
AT1G03370	AT4G17670				AT3G15353	AT1G15420
AT1G05100	AT5G46430				AT2G38270	AT4G13350
AT3G54020	AT4G23640				AT3G27160	AT1G55300
AT2G46490	AT3G11200				AT2G38140	AT1G35580
AT4G26710	AT1G15240				AT5G36120	AT1G35510
AT4G19830	AT4G34215				AT1G64770	AT5G50430
AT3G57470	AT2G17790				AT1G28600	AT3G43740
AT4G30490	AT3G55830				AT2G03750	AT2G31865
AT4G27960	AT4G33160				AT4G02260	AT5G35750
AT3G20060	AT5G67490				AT3G14350	AT4G18710
AT3G07230	AT1G28330				AT2G26770	AT2G20060
AT3G47520	AT1G64355				AT5G01100	AT5G65890
AT4G00300	AT3G53670				AT2G16720	AT2G22780
AT1G65560	AT1G72680				AT1G15010	AT5G40810
AT5G53140	AT5G01830				AT2G46710	AT1G38131
AT5G11480	AT1G75080				AT3G10090	AT5G58740
AT5G27640	AT2G01270				AT3G04090	AT2G28230
AT4G34480	AT3G27050				AT4G19200	AT4G31570
AT5G46840	AT3G22530				AT5G44130	AT1G48110
AT4G23650	AT3G23280				AT3G06880	AT2G27050
AT5G55230	AT5G08710				AT3G21690	AT1G52500
AT1G22140	AT2G32910				AT2G04790	AT5G65360
AT3G09900	AT5G46780				AT3G48890	AT5G61830
AT4G04350	AT2G07671				AT1G78370	AT5G53310
AT5G26110	AT1G15420				AT3G54810	AT3G54670
AT3G49670	AT4G13350				AT3G23230	AT1G22985
AT1G29390	AT1G55300				AT4G22590	AT5G55100
AT5G57040	AT1G35580				AT1G13270	AT5G57940
AT5G15090	AT1G35510				AT4G29020	AT4G24090
AT5G19780	AT5G50430				AT5G17350	AT1G12610
AT1G63680	AT3G43740				AT3G06500	AT4G17150
AT2G34560	AT2G31865				AT1G09310	AT5G58410
AT1G11650	AT5G35750				AT1G49410	AT3G13530
AT4G10970	AT4G18710				AT4G21210	AT2G45140
AT2G30870	AT2G20060				AT1G22780	AT3G18750
AT5G09225	AT5G65890				AT3G15690	AT3G55140
AT2G28420	AT2G22780				AT4G26700	AT3G61240
AT1G71050	AT5G40810				AT1G15290	AT1G59710
AT3G57600	AT1G38131				AT2G38550	AT5G57110
AT1G11450	AT5G58740				AT1G30260	AT3G12050
AT3G60720	AT2G28230				AT3G62030	AT3G45830
AT1G04920	AT4G31570				AT4G38770	AT3G63460
AT4G22233	AT1G48110				AT3G17160	AT2G16280
AT4G02280	AT2G27050				AT4G15410	AT5G35690
AT1G63180	AT1G52500				AT1G07350	AT4G34140
AT1G70020	AT5G65360				AT4G08685	AT5G07470
AT2G45890	AT5G61830				AT2G17240	AT5G04040
AT2G19810	AT5G53310				AT4G14890	AT4G35905
AT5G66440	AT3G54670				AT2G37040	AT1G15230
AT3G16400	AT1G22985				AT1G70210	AT1G34320
AT5G26000	AT5G55100				AT3G57400	AT3G19740
AT4G04450	AT5G57940				AT2G07773	AT3G10500
AT3G24140	AT4G24090				AT2G43710	AT5G50450
AT4G37870	AT1G12610				AT5G54750	AT3G09320
AT1G75030	AT4G17150				AT3G63190	AT5G51570
AT1G33811	AT5G58410				AT1G78570	AT4G27040
AT5G50443	AT3G13530				AT1G05560	AT4G27320
AT3G29770	AT2G45140				AT3G62750	AT5G56190
AT2G46070	AT3G18750				AT2G01140	AT2G27170
AT2G29995	AT3G55140				AT5G30510	AT5G09830
AT3G02380	AT3G61240				AT5G20165	AT5G65280
AT4G12430	AT1G59710				AT4G38840	AT4G14030
AT1G03440	AT5G57110				AT1G55530	AT5G23050
AT5G25840	AT3G12050				AT2G40360	AT1G63880
AT2G46000	AT5G51550				AT2G32120	AT4G05320
AT3G01310	AT3G45830				AT4G32320	AT2G34630
AT4G24026	AT3G63460				AT3G62910	AT5G11980
AT1G69050	AT2G16280				AT4G33250	AT4G04860
AT2G33400	AT5G35690				AT2G27720	AT2G33435
AT5G14920	AT4G34140				AT1G04640	AT1G03365
AT1G52910	AT5G07470				AT1G12840	AT4G40030
AT2G28620	AT5G04040				AT3G48320	AT5G41560
AT1G16960	AT4G35905				AT1G54060	AT5G51460
AT3G49120	AT1G15230				AT1G57850	AT2G40060
AT4G03415	AT1G34320				AT5G15230	AT3G27420
AT3G09730	AT3G19740				AT1G27950	AT1G28410
AT5G26731	AT3G10500				AT2G42380	AT4G11260
AT2G06255	AT5G50450				AT5G48880	AT5G21990
AT5G46230	AT3G09320				AT4G02620	AT3G25470
AT5G43020	AT5G51570				AT4G23890	AT5G38510
AT5G65590	AT4G27040				AT4G30610	AT5G43810
AT1G18840	AT4G27320				AT5G62520	AT5G25760
AT3G01470	AT5G56190				AT4G38660	AT4G32350
AT2G25900	AT2G27170				AT1G77450	AT4G16710
AT4G28330	AT5G09830				AT3G04240	AT4G12110
AT3G58640	AT5G65280				AT3G27830	AT5G13010
AT5G07110	AT4G14030				AT5G44680	AT5G63380
AT3G49600	AT5G23050				AT3G16860	AT5G47310
AT1G27680	AT1G63880				AT4G22830	AT4G27750
AT5G65660	AT4G05320				AT1G42990	AT4G27440
AT3G24150	AT2G34630				AT1G55110	AT4G32850
AT3G56170	AT5G11980				AT1G26550	AT2G25180
AT5G11230	AT4G04860				AT3G44010	AT1G14900
AT2G39800	AT2G33435				AT2G42300	AT3G47690
AT4G35070	AT1G03365				AT5G54160	AT2G36810
AT1G19620	AT4G40030				AT1G70320	AT3G19570
AT4G29520	AT5G41560				AT2G32690	AT2G25930
AT1G75730	AT5G51460				AT3G27260	AT3G15480
AT2G31390	AT2G40060				AT1G48830	AT1G07510
AT1G09210	AT3G27420				AT1G07930	AT5G39320
AT4G09030	AT1G28410				AT1G75800	AT4G03390
AT2G37180	AT4G11260				AT1G67350	AT3G10300
AT3G55390	AT5G21990				AT4G02770	AT1G67580
AT1G14460	AT3G25470				AT5G07020	AT5G17900
AT1G14010	AT5G38510				AT1G34430	AT4G15415
AT4G16660	AT5G43810				AT1G26770	AT2G44770
AT1G71830	AT5G25760				AT3G07100	AT3G11800
AT1G15970	AT4G32350				AT1G26210	AT1G28960
AT3G03680	AT4G16710				AT3G23250	AT3G09770
AT3G21560	AT4G12110				AT1G13380	AT4G21570
AT2G15830	AT5G13010				AT1G32230	AT4G09720
AT2G39805	AT5G63380				AT5G46710	AT1G26850
AT1G17940	AT5G47310				AT3G06325	AT3G56190
AT3G51980	AT4G27750				AT1G35140	AT5G65900
AT1G70710	AT4G27440				AT1G63090	AT3G03070
AT2G39810	AT4G32850				AT1G50200	AT2G32210
AT1G21750	AT2G25180				AT1G10360	AT4G17050
AT1G30135	AT1G14900				AT5G17990	AT4G30330
AT3G50630	AT3G47690				AT2G24395	AT2G36490
AT2G38370	AT2G36810				AT4G30390	AT5G09390
AT4G28980	AT3G19570				AT5G44020	AT2G32260
AT3G51670	AT2G25930				AT3G54420	AT4G01810
AT5G48485	AT3G15480				AT3G23810	AT5G51545
AT2G35736	AT1G07510				ATCG00500	AT5G63160
AT3G23730	AT5G39320				AT3G24500	AT3G17430
AT4G27270	AT4G03390				AT3G43720	AT4G02120
AT4G23430	AT3G10300				AT1G70820	AT4G32640
AT5G48180	AT1G67580				AT3G18290	AT5G58130
AT1G42480	AT5G17900				AT3G54600	AT5G11710
AT2G41475	AT4G15415				AT3G51600	AT4G21560
AT3G62830	AT2G44770				AT2G42540	AT1G53165
AT5G02280	AT3G11800				AT1G68590	AT2G33610
AT3G12920	AT1G28960				AT3G16250	AT2G38740
AT5G39730	AT3G09770				AT5G49460	AT3G13570
AT1G01300	AT4G21570				AT3G52450	AT5G56290
AT3G03900	AT4G09720				AT5G51820	AT5G10860
AT2G37170	AT1G26850				AT1G22840	AT1G71710
AT4G24920	AT3G56190				AT2G26670	AT5G18410
AT5G42970	AT5G65900				AT2G05520	AT1G69980
AT3G10550	AT3G03070				AT3G02730	AT5G60360
AT2G38610	AT2G32210				AT4G25080	AT3G14205
AT1G12420	AT4G17050				AT3G44890	AT3G06660
AT4G18280	AT4G30330				AT4G09800	AT1G18190
AT5G60680	AT2G36490				AT2G48070	AT4G23630
AT1G61930	AT5G09390				AT5G54250	AT5G22000
AT3G54290	AT2G32260				AT5G08760	AT4G00900
AT3G52590	AT4G01810				AT2G06925	AT1G77140
AT3G02230	AT5G51545				AT2G27580	AT1G71980
AT5G15490	AT5G63160				AT5G62130	AT4G00290
AT1G12400	AT3G17430				AT4G36945	AT3G53710
AT5G40970	AT4G02120				AT4G22890	AT1G27210
AT5G07350	AT4G32640				AT1G51100	AT3G62800
AT5G60460	AT5G58130				AT3G08530	AT4G11740
AT3G28040	AT5G11710				AT5G51720	AT4G28860
AT3G25220	AT4G21560				AT5G35740	AT2G39750
AT3G52850	AT1G53165				AT2G35680	AT5G24610
AT1G72610	AT2G33610				AT1G09130	AT5G45050
AT2G42280	AT2G38740				AT5G53880	AT3G44860
AT5G43330	AT3G13570				AT2G45710	AT2G17230
AT4G21960	AT5G56290				AT1G06950	AT3G17240
AT1G26630	AT5G10860				AT4G16690	AT5G08500
AT3G14595	AT1G71710				AT1G71480	AT5G23390
AT3G18040	AT5G18410				AT1G26920	AT1G15860
AT2G32920	AT1G69980				AT1G72210	AT3G07460
AT4G38970	AT5G60360				AT5G24660	AT2G05940
AT5G54440	AT3G14205				AT5G66030	AT4G38570
AT3G25040	AT3G06660				AT3G56340	AT2G45200
AT4G16720	AT1G18190				AT2G33150	AT2G19790
AT2G33380	AT4G23630				AT1G65720	AT3G53880
AT1G05870	AT5G22000				AT2G04039	AT1G04780
AT2G45070	AT4G00900				AT1G01100	AT5G60340
AT2G44060	AT1G77140				AT4G25350	AT5G60640
AT1G70770	AT1G71980				AT3G10185	AT1G19880
AT3G13520	AT4G00290				AT2G31610	AT3G33530
AT5G47430	AT3G53710				AT1G17860	AT5G09960
AT1G32210	AT1G28480				AT4G34881	AT2G34040
AT2G30930	AT1G27210				AT1G04820	AT1G12910
AT3G16240	AT3G62800				AT3G16370	AT1G68910
AT5G47060	AT4G11740				AT3G04400	AT3G03120
AT2G21330	AT4G28860				AT1G32550	AT5G38990
AT2G25620	AT2G39750				AT1G75950	AT5G65700
AT1G71190	AT5G24610				AT4G16760	AT4G33960
AT5G01970	AT5G45050				AT4G25490	AT1G10870
AT5G20700	AT3G44860				ATMG01120	AT5G11140
AT2G25070	AT2G17230				AT2G25140	AT1G26110
AT3G14430	AT3G17240				AT5G39570	AT2G38950
AT3G53520	AT5G08500				AT5G19390	AT5G59140
AT3G01790	AT5G23390				AT2G02130	AT5G57010
AT5G20500	AT1G15860				AT4G39670	AT5G15540
AT3G17365	AT3G07460				AT5G58250	AT3G17450
AT1G20630	AT2G05940				AT3G59350	AT5G56140
AT2G25110	AT4G38570				AT2G38400	AT1G65840
AT1G12090	AT2G45200				AT5G25220	AT1G75280
AT1G66240	AT2G19790				AT4G14040	AT4G00660
AT5G56630	AT3G53880				AT3G09210	AT4G02570
AT3G12490	AT1G04780				AT4G35250	AT1G34210
ATCG00570	AT5G60340				AT1G06550	AT4G33530
AT4G25720	AT5G60640				AT1G64330	AT3G16110
AT3G62250	AT1G19880				AT4G26850	AT2G38880
AT3G05420	AT3G33530				AT2G31040	AT5G19900
AT1G20970	AT5G09960				AT1G20920	AT3G08510
AT2G32060	AT2G34040				AT3G11560	AT1G53350
AT5G27850	AT1G12910				AT4G21910	AT2G18670
AT2G38170	AT1G68910				AT1G09660	AT1G56170
AT3G16640	AT3G03120				AT4G20860	AT1G10840
AT4G02720	AT5G38990				AT5G65380	AT4G29160
AT2G39630	AT3G46640				AT4G23170	AT2G25310
AT3G19010	AT5G65700				AT1G74930	AT4G14300
AT4G36500	AT4G33960				AT2G22080	AT3G24080
AT4G02980	AT1G10870				AT5G15200	AT5G63470
AT4G21150	AT5G11140				AT2G37120	AT5G26600
AT5G14550	AT1G26110				AT3G03770	AT1G12580
AT3G60860	AT2G38950				AT5G44290	AT2G36530
AT3G48930	AT5G59140				AT3G57330	AT4G13940
AT2G14740	AT5G57010				AT4G21620	AT5G61230
AT1G18300	AT5G15540				AT2G20530	AT5G23090
ATCG01050	AT3G17450				AT5G47040	AT5G04600
AT1G59870	AT5G56140				AT4G21990	AT5G49930
AT3G07680	AT1G65840				AT5G64660	AT3G51080
AT5G19240	AT1G75280				AT2G39670	AT2G13560
AT1G80840	AT4G00660				AT2G43530	AT1G05205
AT5G20290	AT4G02570				AT4G17330	AT4G20170
AT3G09455	AT1G34210				AT2G38010	AT2G32980
AT2G10940	AT4G33530				AT1G07770	AT1G05630
AT4G15780	AT3G16110				AT4G39460	AT2G01470
AT5G17190	AT2G38880				AT3G08920	AT4G10040
AT3G11510	AT5G19900				AT4G30620	AT1G43690
AT5G65390	AT3G08510				AT4G23400	AT5G03660
ATCG01070	AT1G53350				AT5G09870	AT5G07370
AT4G33010	AT1G70740				AT1G55920	AT3G03330
AT3G53740	AT2G18670				AT1G03870	AT2G21340
AT2G41090	AT1G56170				AT1G26220	AT1G54100
AT5G63790	AT1G10840				AT1G21720	AT5G08230
AT2G40205	AT4G29160				AT4G15510	AT2G38020
AT2G13360	AT2G25310				AT1G16080	AT5G10940
AT4G17940	AT4G14300				AT5G55290	AT3G09740
AT1G52360	AT3G24080				AT3G12740	AT5G51740
AT4G29010	AT5G63470				AT5G60400	AT1G29660
AT1G19870	AT5G26600				AT2G04390	AT5G23670
AT3G47670	AT1G12580				AT4G24160	AT4G25660
AT3G62600	AT2G36530				AT2G29310	AT1G45688
ATCG00800	AT4G13940				AT4G27720	AT5G13390
AT1G29930	AT5G61230				AT5G05210	AT4G31510
AT2G40510	AT5G23090				AT1G44350	AT5G66880
AT5G62880	AT5G04600				AT1G20090	AT3G25700
AT2G46800	AT5G49930				AT5G01750	AT1G12680
AT1G12900	AT3G51080				AT3G50440	AT4G39260
AT4G17270	AT2G13560				AT2G35290	AT5G19960
AT5G18900	AT1G05205				AT3G49360	AT4G21160
AT3G50820	AT4G20170				AT3G17040	AT3G61070
ATCG01080	AT2G32980				AT1G33140	AT3G60240
AT5G58440	AT1G05630				AT3G61580	AT5G66930
AT3G11940	AT2G01470				AT1G48320	AT5G46070
AT3G27210	AT4G10040				AT1G11430	AT2G02220
AT5G06140	AT1G43690				AT5G48300	AT5G11500
AT2G20670	AT5G03660				AT4G13180	AT4G36730
AT3G52710	AT5G07370				AT5G19875	AT4G05420
AT3G21055	AT3G03330				AT1G06040	AT3G61980
AT1G62790	AT2G21340				AT3G32930	AT4G32250
AT1G11890	AT1G54100				AT4G34190	AT3G19800
AT3G56070	AT5G08230				AT5G66720	AT1G63980
AT5G49910	AT2G38020				AT3G63170	AT2G37680
AT1G56340	AT5G10940				AT4G33780	AT5G44860
ATCG00070	AT3G09740				AT3G26070	AT5G61150
AT1G76200	AT5G51740				AT5G17840	AT1G80930
AT3G02800	AT1G29660				AT5G46030	AT4G10710
AT5G19690	AT5G23670				AT5G67450	AT1G51980
AT5G47910	AT4G25660				AT5G46290	AT2G38650
AT4G27090	AT1G45688				AT5G66090	AT3G55030
AT2G04900	AT5G13390				AT5G17630	AT4G35360
AT3G46440	AT4G31510				AT1G70480	AT3G15810
AT5G20910	AT5G66880				AT3G58600	AT3G43810
AT4G19410	AT3G25700				AT4G22690	AT2G26660
AT5G46020	AT1G12680				AT4G37200	AT5G13970
AT4G27560	AT4G39260				AT1G13320	AT5G54310
AT1G60710	AT5G19960				AT3G51820	AT1G75850
AT4G20360	AT4G21160				AT4G01900	AT5G23150
AT5G03340	AT3G61070				AT4G01950	AT4G21940
AT4G29905	AT3G60240				AT4G28460	AT3G54840
AT4G25050	AT5G66930				AT2G34640	AT4G10840
AT1G06210	AT5G46070				AT5G05250	AT1G78140
AT5G66680	AT2G02220				AT2G33040	AT3G22845
AT5G42020	AT5G11500				AT4G24690	AT3G11650
AT4G31700	AT4G36730				AT2G46220	AT1G12820
AT4G17870	AT4G05420				AT5G07240	AT5G06830
AT1G56110	AT3G61980				AT1G80300	AT4G14615
AT3G14230	AT4G32250				AT5G44870	AT4G36080
AT2G25510	AT3G19800				AT5G42300	AT2G27960
AT3G47960	AT1G63980				AT5G61600	AT4G33625
AT1G08570	AT2G37680				AT2G30010	AT2G03430
AT5G15750	AT5G44860				AT1G54410	AT5G64470
ATCG00490	AT5G61150				AT5G55730	AT5G62190
AT1G76650	AT1G80930				AT5G63400	AT5G15920
ATCG00470	AT4G10710				AT4G09460	AT4G11150
AT1G29910	AT1G51980				AT1G61740	AT2G02570
AT3G55800	AT2G38650				AT5G50950	AT4G11660
AT5G51960	AT3G55030				AT1G27970	AT2G36480
AT3G46560	AT4G35360				ATCG01120	AT4G35985
AT1G56580	AT3G15810				AT1G14720	AT4G30790
AT1G61520	AT3G43810				AT4G02840	AT3G27240
AT3G19960	AT2G26660				AT5G45340	AT3G60410
AT2G19740	AT5G13970				AT5G48530	AT5G20490
AT2G22500	AT5G54310				AT5G53400	AT5G10630
AT5G02960	AT1G75850				ATCG00170	AT1G80640
AT1G20575	AT5G23150				AT4G34120	AT5G65207
AT3G63160	AT4G21940				AT5G54940	AT3G59940
AT5G08160	AT3G54840				AT3G13920	AT3G19130
AT4G04640	AT4G10840				AT4G23810	AT4G10920
AT4G10790	AT1G78140				AT3G03780	AT3G22760
ATCG00660	AT3G22845				AT3G06070	AT2G28080
AT5G14740	AT3G11650				AT1G34030	AT2G43500
ATCG00120	AT1G12820				AT3G24590	AT5G06710
AT5G47930	AT5G06830				AT1G09590	AT3G22520
AT1G02780	AT4G14615				AT1G74090	AT4G23330
AT2G21600	AT4G36080				AT5G13930	AT1G15940
AT4G23180	AT2G27960				AT3G49680	AT2G20740
AT3G62410	AT4G33625				AT2G26540	AT3G58730
AT4G27652	AT2G03430				AT2G40880	AT1G15750
AT2G23340	AT5G64470				AT1G53840	ATMG00690
AT1G67430	AT5G62190				AT1G66160	AT5G16110
ATCG00540	AT5G15920				AT1G06190	AT4G37120
AT1G77710	AT4G11150				AT3G47430	AT4G16580
ATCG00040	AT2G02570				AT2G42600	AT1G54390
AT1G19770	AT4G11660				AT2G24500	AT5G67245
AT5G58420	AT2G38790				AT1G76690	AT3G20270
ATCG00130	AT2G36480				AT4G31500	AT4G38760
AT1G45474	AT4G33300				AT1G68570	AT4G26610
AT5G03380	AT4G35985				AT2G46650	AT5G52580
AT2G37220	AT4G30790				AT3G57610	AT1G20840
AT5G64310	AT3G27240				AT3G01430	AT5G47620
AT3G14420	AT3G60410				AT3G18130	AT4G03000
AT4G29780	AT5G20490				AT5G11420	AT1G15920
AT4G00440	AT5G10630				AT4G34760	AT5G13160
AT1G76680	AT1G80640				AT2G23430	AT3G28940
AT1G69010	AT5G65207				AT3G04650	AT1G34020
AT5G10840	AT3G59940				AT4G39990	AT4G02020
AT5G16840	AT3G19130				AT5G53570	AT3G04740
AT3G49800	AT4G10920				AT5G58670	AT3G57050
AT2G21250	AT3G22760				AT4G23740	AT2G42590
ATCG00710	AT2G28080				AT1G15280	AT1G26300
AT1G56220	AT2G43500				AT3G07110	AT4G08920
AT1G43890	AT5G06710				AT3G20670	AT1G08190
AT2G36620	AT3G22520				AT3G28900	AT4G29940
AT5G06290	AT4G23330				AT3G01280	AT3G50500
AT4G30530	AT1G15940				AT2G01110	AT1G53910
ATCG00080	AT2G20740				AT1G09940	AT1G12860
AT3G49260	AT3G58730				AT5G66620	AT5G60790
AT3G44310	AT1G15750				AT4G34260	AT5G64200
AT2G30270	ATMG00690				AT5G51560	AT4G22330
AT4G37930	AT5G16110				AT2G27385	AT1G79660
AT4G17090	AT4G37120				AT5G01015	AT2G21195
AT1G78900	AT4G16580				AT3G05840	AT4G20400
AT1G32080	AT1G54390				AT2G38465	AT1G50430
AT3G17800	AT5G67245				AT1G13280	AT3G21215
AT4G17490	AT3G20270				AT5G13100	AT2G17990
AT4G14270	AT4G38760				AT5G66550	AT1G24020
AT4G31550	AT4G26610				AT3G62400	AT4G14360
AT3G03990	AT5G52580				AT4G21860	AT1G43190
AT5G03460	AT1G20840				AT3G24550	AT2G34840
AT1G03130	AT5G47620				AT2G16800	AT5G67560
AT3G63140	AT4G03000				AT5G50850	AT4G39100
AT4G12800	AT1G15920				AT5G07870	AT4G38600
AT5G64040	AT5G13160				AT5G36925	AT3G57410
ATCG01130	AT3G28940				AT4G37800	AT5G66250
AT5G20000	AT1G34020				AT1G15820	AT5G18580
AT5G13450	AT4G02020				AT4G24350	AT3G26810
AT2G31880	AT3G04740				AT4G18570	AT5G08565
AT1G13930	AT3G57050				AT4G04570	AT1G33980
AT5G07220	AT2G42590				AT3G55040	AT2G32730
AT1G68300	AT1G26300				AT3G45970	AT4G23470
AT5G06320	AT4G08920				AT3G29390	AT1G20693
AT5G16970	AT1G08190				AT2G26910	AT4G22120
AT1G01620	AT4G29940				AT1G55260	AT4G22740
AT1G77940	AT3G50500				AT5G05270	AT1G68070
AT5G08790	AT1G53910				AT1G24764	AT4G02450
AT5G11680	AT1G12860				AT1G62380	AT4G39170
AT1G31300	AT5G60790				AT4G33430	AT1G59750
AT1G04750	AT5G64200				AT5G48760	AT3G54280
AT1G17080	AT4G22330				AT5G66070	AT2G30880
AT1G17420	AT1G79660				AT4G04890	AT4G35860
AT1G35680	AT2G21195				AT4G18970	AT1G23550
AT3G56710	AT4G20400				AT3G50480	AT1G32400
AT4G37440	AT1G50430				AT5G23210	AT2G39940
AT3G17780	AT3G21215				AT4G09890	AT1G55535
AT5G19140	AT2G17990				AT1G10170	AT3G29320
AT4G30950	AT5G21090				AT5G04410	AT2G29630
AT4G10080	AT1G24020				AT5G50810	AT5G50920
AT1G76600	AT4G14360				AT4G38225	AT5G56150
AT1G30230	AT1G43190				AT1G01030	AT4G24740
AT3G53620	AT2G34840				AT3G48310	AT4G16430
AT1G78630	AT5G67560				AT4G39330	AT4G25360
AT1G09690	AT4G39100				AT2G36160	AT1G55520
AT1G50320	AT4G38600				AT5G42050	AT4G15130
AT5G14030	AT3G57410				AT3G04290	AT4G34350
AT5G09660	AT5G66250				AT3G26180	AT1G64550
AT5G38410	AT5G18580				AT1G76100	AT2G03800
AT5G61410	AT3G26810				AT1G23740	AT3G05545
ATCG01020	AT5G08565				AT3G06750	AT2G46550
AT1G03680	AT1G33980				AT1G71695	AT1G57680
AT2G45180	AT2G32730				AT3G18000	AT5G48460
AT1G12810	AT4G23470				AT5G02790	AT5G17610
AT1G55450	AT1G20693				AT1G11850	AT4G11670
AT4G21280	AT4G22120				AT1G24147	AT5G35620
AT2G14720	AT4G22740				AT5G59670	AT3G60080
AT2G35900	AT1G68070				AT1G19180	AT1G78890
AT2G43030	AT4G02450				AT3G52720	AT2G26070
AT4G14710	AT4G39170				AT4G31880	AT5G22510
ATCG00140	AT1G59750				AT1G41880	AT5G58375
AT5G42530	AT3G54280				AT1G63970	AT2G16640
AT5G44070	AT2G30880				AT1G24330	AT3G10210
AT3G58170	AT4G35860				AT4G04020	AT4G30900
AT3G62290	AT1G23550				AT4G24380	AT1G50370
AT3G14130	AT1G32400				AT2G15620	AT2G45170
AT3G47370	AT2G39940				AT5G53300	AT1G01040
AT5G08330	AT1G55535				AT2G36895	AT4G17830
AT3G04920	AT3G29320				AT2G43945	AT3G06610
AT2G18020	AT2G29630				AT2G22230	AT1G80890
AT5G07340	AT5G50920				AT5G42765	AT5G17170
AT2G01180	AT5G56150				AT3G55170	AT1G55340
AT3G60245	AT4G24740				AT5G59510	AT5G12310
AT1G25400	AT4G16430				AT4G02790	AT3G06670
AT1G52230	AT4G25360				AT2G33370	AT3G07870
AT1G58602	AT1G55520				AT1G74270	AT2G17730
AT2G30860	AT4G15130				AT2G42130	AT5G62460
AT2G34480	AT4G34350				AT1G63750	AT5G03285
AT2G30050	AT1G64550				AT1G64780	AT2G34250
AT2G21580	AT2G03800				AT1G75750	AT5G15780
AT5G43830	AT3G05545				AT5G50740	AT1G51200
AT2G38670	AT2G46550				AT5G48220	AT2G40380
AT5G04140	AT1G57680				AT4G34630	AT1G80490
AT5G63030	AT5G48460				AT1G76670	AT2G26920
AT5G08130	AT5G17610				AT1G66180	AT1G47640
AT3G06700	AT4G11670				AT1G11750	AT5G15740
AT2G40000	AT5G35620				AT3G15518	AT1G64860
AT2G24765	AT3G60080				AT4G34620	AT3G51460
AT2G26530	AT1G78890				AT1G60200	AT5G65440
AT1G32060	AT2G26070				AT5G46295	AT3G52560
AT3G53870	AT5G64340				AT1G13560	AT5G61780
AT3G04790	AT5G22510				AT3G10930	AT1G61140
AT5G20520	AT5G58375				AT3G04940	AT2G01720
AT4G22920	AT5G14270				AT5G57800	AT3G42150
AT1G10630	AT2G16640				AT5G08000	AT1G01360
AT4G33200	AT3G10210				AT5G63410	AT1G71900
AT5G28540	AT4G30900				AT2G34930	AT2G40300
AT5G27700	AT1G50370				AT5G45930	AT3G01450
AT4G35785	AT2G45170				AT3G12390	AT1G18480
AT3G61470	AT1G01040				AT1G06360	AT3G61140
AT3G59540	AT4G17830				AT4G33480	AT5G27620
AT3G14415	AT3G06610				AT5G08180	AT2G16950
AT3G06850	AT1G80890				AT3G56940	AT2G47640
AT3G04630	AT1G61100				AT3G12630	AT5G09890
AT4G38620	AT5G17170				AT2G36880	AT1G79200
AT3G55280	AT1G55340				AT3G43800	AT2G25660
AT3G13845	AT5G12310				AT4G23600	ATMG00570
AT1G42960	AT3G06670				AT3G48520	AT3G46060
AT3G60750	AT3G07870				ATMG00285	AT1G28440
AT5G57560	AT2G17730				AT2G23670	AT1G16860
AT4G22780	AT5G62460				AT1G66410	AT2G34300
AT2G47730	AT5G03285				AT3G20390	AT3G03340
ATCG00680	AT2G34250				AT1G22610	AT2G28540
AT1G42970	AT5G15780				AT4G14760	AT2G25735
ATCG01040	AT1G51200				AT4G30280	AT3G04780
AT4G14420	AT2G40380				AT2G11910	AT3G48140
AT1G13790	AT1G80490				AT2G46820	AT1G27130
ATCG00350	AT2G26920				ATMG01000	AT1G72480
AT2G35520	AT1G47640				AT5G01410	AT1G78510
AT5G20630	AT5G15740				AT1G29150	AT2G27600
AT3G51800	AT1G64860				AT4G32020	AT5G27470
AT4G27654	AT3G51460				AT5G62470	AT4G34660
AT5G63320	AT5G65440				AT4G38400	AT4G16380
AT1G62040	AT3G52560				AT5G45775	AT5G15400
AT1G31580	AT5G61780				AT5G03630	AT1G54490
AT1G14320	AT1G61140				AT5G63840	AT3G17440
AT3G56910	AT2G01720				AT3G26450	AT5G02480
AT2G35240	AT3G42150				AT1G12430	AT2G25950
AT5G38430	AT1G01360				AT5G63050	AT2G29070
AT5G64350	AT1G71900				AT1G78820	AT2G41490
AT1G67090	AT2G40300				AT2G02740	AT1G32810
AT2G17930	AT3G01450				AT5G16200	AT4G02880
AT2G46280	AT1G18480				AT4G23850	AT3G61050
AT1G72930	AT3G61140				AT4G32915	AT4G24440
AT2G47060	AT5G27620				AT4G21750	AT2G45810
AT4G14716	AT2G16950				AT4G21320	AT3G18140
AT1G76080	AT2G47640				AT5G02610	AT4G01320
AT3G57450	AT5G09890				AT3G22370	AT1G47970
AT1G20340	AT1G79200				AT1G04040	AT3G47000
ATCG01100	AT2G25660				AT3G55750	AT5G66005
AT2G39960	ATMG00570				AT1G72970	AT1G05805
AT1G17440	AT3G46060				AT5G41100	AT4G30820
AT3G10720	AT1G28440				AT3G51420	AT1G24706
AT5G17920	AT1G16860				AT2G31560	AT5G24450
AT5G09650	AT2G34300				AT1G21130	AT4G15470
AT4G27657	AT3G03340				AT3G18560	AT3G63070
AT1G65490	AT2G28540				AT3G23050	AT1G58100
AT5G19220	AT2G25735				AT4G38920	AT1G27930
ATCG00280	AT3G04780				AT5G42070	AT5G19770
AT2G01350	AT3G48140				AT3G57800	AT1G16700
AT3G54760	AT1G27130				AT1G17880	AT3G07020
AT3G05500	AT1G72480				AT5G23820	AT2G29700
AT5G66570	AT1G78510				AT2G40340	AT1G14000
AT1G27695	AT2G27600				AT1G01170	AT5G25540
AT5G12860	AT5G27470				AT1G63700	AT5G13020
AT4G17500	AT4G34660				AT2G01420	AT3G58510
[truncated: 3,097 more rows]
