# Supplementary material for: Co-option and neofunctionalization of stomatal executors for defence against herbivores in Brassicales
Source: Nat Plants. 2025 Feb 24;11(3):483–504. doi: 10.1038/s41477-025-01921-1 (PMC11928322; doi:10.1038/s41477-025-01921-1)
Supplement: Supplementary file 13 — Synteny analysis of WSB orthologues. [file 41477_2025_1921_MOESM13_ESM.xlsx]

## Sheet: Sheet2
	AT3G57530		ath	AT3G57530.1	HOM04D000039	ORTHO04D000572	calcium-dependent protein kinase 32	protein_serine/threonine_kinase_activity:calmodulin-dependent_protein_kinase_activity:calcium_ion_binding:calmodulin_binding:ATP_binding:plasma_membrane:protein_phosphorylation:kinase_activity:peptidyl-serine_phosphorylation:intracellular_signal_transduction:protein_autophosphorylation:calcium-dependent_protein_kinase_C_activity:protein_binding:nucleus:response_to_salt_stress:abscisic_acid-activa…	EF-hand_domain:Protein_kinase_domain:Protein_kinase,_ATP_binding_site:EF-Hand_1,_calcium-binding_site:Serine/threonine-protein_kinase,_active_site:EF-hand_domain_pair:Protein_kinase-like_domain
	AT3G57540		ath	AT3G57540.1	HOM04D004328	ORTHO04D005215	Remorin family protein	DNA_binding:nucleus:biological_process:plasma_membrane:negative_regulation_of_brassinosteroid_mediated_signaling_pathway:abscisic_acid-activated_signaling_pathway	Remorin,_C-terminal
	AT3G57550		ath	AT3G57550.1	HOM04D003151	ORTHO04D004119	guanylate kinase	guanylate_kinase_activity:ATP_binding:cytoplasm:cytosol:phosphorylation:nucleotide_metabolic_process:gametophyte_development:regulation_of_developmental_growth:purine_nucleotide_metabolic_process	Guanylate_kinase/L-type_calcium_channel_beta_subunit:Guanylate_kinase,_conserved_site:Guanylate_kinase-like_domain:Galactose_oxidase/kelch,_beta-propeller:P-loop_containing_nucleoside_triphosphate_hydrolase:Guanylate_kinase
	AT3G57560		ath	AT3G57560.1	HOM04D004822	ORTHO04D007265	N-acetyl-l-glutamate kinase	acetylglutamate_kinase_activity:ATP_binding:arginine_biosynthetic_process:proline_biosynthetic_process:chloroplast_stroma:phosphorylation:protein_binding:chloroplast:arginine_biosynthetic_process_via_ornithine:arginine_binding:chloroplast_thylakoid:cytoplasm	Acetylglutamate_kinase:Aspartate/glutamate/uridylate_kinase:Glutamate/acetylglutamate_kinase
	AT3G57570		ath	AT3G57570.1	HOM04D005651	ORTHO04D007011	ARM repeat superfamily protein	cellular_component:biological_process:binding	Armadillo-like_helical:Armadillo-type_fold
	AT3G57580		ath	AT3G57580.1	HOM04D000234	ORTHO04D000126	F-box and associated interaction domains-containing protein	molecular_function:nucleus:biological_process:protein_binding:ubiquitin-dependent_protein_catabolic_process:negative_regulation_of_abscisic_acid-activated_signaling_pathway:response_to_water_deprivation:plasma_membrane:cellular_response_to_water_deprivation:stomatal_movement:regulation_of_stomatal_movement:plasmodesma:response_to_abscisic_acid:chloroplast	F-box_associated_domain,_type_3:F-box_domain:F-box_associated_interaction_domain
	AT3G57587		ath	AT3G57587.1	HOM04D000513	ORTHO04D000366	Ta11-like non-LTR retrotransposon	#N/A	Zinc_knuckle_CX2CX4HX4C:Domain_of_unknown_function_DUF4283
	AT3G57590		ath	AT3G57590.1	HOM04D000234	ORTHO04D000126	F-box and associated interaction domains-containing protein	molecular_function:nucleus:biological_process:protein_binding:ubiquitin-dependent_protein_catabolic_process:negative_regulation_of_abscisic_acid-activated_signaling_pathway:response_to_water_deprivation:plasma_membrane:cellular_response_to_water_deprivation:stomatal_movement:regulation_of_stomatal_movement:plasmodesma:response_to_abscisic_acid:chloroplast	F-box_associated_domain,_type_3:F-box_domain:F-box_associated_interaction_domain
ERF51/WSB	AT3G57600		ath	AT3G57600.1	HOM04D000166	ORTHO04D000506	Integrase-type DNA-binding superfamily protein	DNA_binding:transcription_factor_activity,_sequence-specific_DNA_binding:nucleus:transcription,_DNA-templated:regulation_of_transcription,_DNA-templated	AP2/ERF_domain:AP2/ERF_transcription_factor_ERF/PTI6:DNA-binding_domain
	AT3G57610		ath	AT3G57610.1	HOM04D003535	ORTHO04D004581	adenylosuccinate synthase	adenylosuccinate_synthase_activity:GTP_binding:purine_ribonucleotide_biosynthetic_process:chloroplast:de_novo'_AMP_biosynthetic_process:IMP_metabolic_process:metal_ion_binding:chloroplast_stroma:response_to_cadmium_ion:apoplast:cytosol:plastid:AMP_biosynthetic_process:purine_nucleotide_biosynthetic_process	Adenylosuccinate_synthetase:Adenylosuccinate_synthase,__active_site:Adenylosuccinate_synthase,_GTP-binding_site:P-loop_containing_nucleoside_triphosphate_hydrolase
	AT3G57620		ath	AT3G57620.1	HOM04D000389	ORTHO04D000286	glyoxal oxidase-related protein	molecular_function:extracellular_region:biological_process	Domain_of_unknown_function_DUF1929:Galactose_oxidase,_beta-propeller:Immunoglobulin-like_fold:Glyoxal_oxidase,_N-terminal:Immunoglobulin_E-set:Galactose_oxidase/kelch,_beta-propeller
	AT3G57630		ath	AT3G57630.1	HOM04D003198	ORTHO04D004632	exostosin family protein	catalytic_activity:membrane:integral_component_of_membrane:transferase_activity	Exostosin-like:EGF-like,_conserved_site:EGF-like_domain
	AT3G57640		ath	AT3G57640.1	HOM04D000022	ORTHO04D010582	Protein kinase superfamily protein	protein_kinase_activity:ATP_binding:protein_phosphorylation	Protein_kinase_domain:Protein_kinase-like_domain
	AT3G57650		ath	AT3G57650.1	HOM04D001032	ORTHO04D002687	lysophosphatidyl acyltransferase 2	1-acylglycerol-3-phosphate_O-acyltransferase_activity:extracellular_region:endoplasmic_reticulum_membrane:multicellular_organism_development:integral_component_of_membrane:CDP-diacylglycerol_biosynthetic_process:endoplasmic_reticulum:metabolic_process:transferase_activity,_transferring_acyl_groups	Phospholipid/glycerol_acyltransferase:Acyltransferase,_C-terminal_domain
	AT3G57660		ath	AT3G57660.2	HOM04D000760	ORTHO04D005058	nuclear RNA polymerase A1	RNA_polymerase_I_activity:DNA_binding:DNA-directed_5'-3'_RNA_polymerase_activity:nucleus:DNA-directed_RNA_polymerase_I_complex:transcription,_DNA-templated:zinc_ion_binding:ribosome_biogenesis:cytosol:plasmodesma:transcription_from_RNA_polymerase_I_promoter	DNA-directed_RNA_pol_I,_largest_subunit:RNA_polymerase_Rpb1,_domain_5:RNA_polymerase_Rpb1,_domain_3:RNA_polymerase_Rpb1,_domain_1:RNA_polymerase_Rpb1,_domain_4:RNA_polymerase,_alpha_subunit:RNA_polymerase,_N-terminal
	AT3G57670		ath	AT3G57670.1	HOM04D000654	ORTHO04D000494	C2H2-type zinc finger family protein	nucleic_acid_binding:nucleus:transcription,_DNA-templated:zinc_ion_binding:metal_ion_binding:transcription_factor_activity,_sequence-specific_DNA_binding:regulation_of_transcription,_DNA-templated:pollen_tube_growth:transmitting_tissue_development:fruit_replum_development:cell_fate_determination:primary_root_development:regulation_of_gene_expression	Zinc_finger,_RING/FYVE/PHD-type:Zinc_finger_C2H2-type
	AL5G39110		aly	AT3G57530	HOM04D000039	ORTHO04D000572	#N/A	calcium_ion_binding:protein_kinase_activity:ATP_binding:protein_phosphorylation:calcium-dependent_protein_kinase_C_activity:plasma_membrane:cytoplasm:response_to_salt_stress:plasmodesma:response_to_abscisic_acid:protein_binding:abscisic_acid-activated_signaling_pathway:nucleus
	AL5G39120		aly	AT3G57540	HOM04D004328	ORTHO04D005215	#N/A	plasma_membrane:negative_regulation_of_brassinosteroid_mediated_signaling_pathway:abscisic_acid-activated_signaling_pathway
	AL5G39130		aly	AT3G57550	HOM04D003151	ORTHO04D004119	#N/A	guanylate_kinase_activity:purine_nucleotide_metabolic_process:nucleotide_metabolic_process:regulation_of_developmental_growth:gametophyte_development
	AL5G39140		aly	AT3G57560	HOM04D004822	ORTHO04D007265	Acetylglutamate_kinase	acetylglutamate_kinase_activity:cytoplasm:arginine_biosynthetic_process:chloroplast_thylakoid:arginine_biosynthetic_process_via_ornithine:protein_binding:chloroplast:arginine_binding
	AL5G39150		aly	AT3G57570	HOM04D005651	ORTHO04D007011	#N/A	binding
	AL5G39160		aly	AT3G57580	HOM04D000234	ORTHO04D000126	#N/A	protein_binding:ubiquitin-dependent_protein_catabolic_process:negative_regulation_of_abscisic_acid-activated_signaling_pathway:response_to_water_deprivation:plasma_membrane:cellular_response_to_water_deprivation:stomatal_movement:regulation_of_stomatal_movement:plasmodesma:response_to_abscisic_acid:chloroplast
	AL5G39170		aly	#N/A	HOM04D000234	ORTHO04D000126	#N/A	protein_binding:ubiquitin-dependent_protein_catabolic_process:negative_regulation_of_abscisic_acid-activated_signaling_pathway:response_to_water_deprivation:plasma_membrane:cellular_response_to_water_deprivation:stomatal_movement:regulation_of_stomatal_movement:plasmodesma:response_to_abscisic_acid:chloroplast
WSB	AL5G39180		aly	AT3G57600	HOM04D000166	ORTHO04D000506	#N/A	transcription_factor_activity,_sequence-specific_DNA_binding:regulation_of_transcription,_DNA-templated:DNA_binding
	AL5G39190		aly	AT3G57610	HOM04D003535	ORTHO04D004581	Adenylosuccinate_synthetase:Adenylosuccinate_synthase,__active_site:Adenylosuccinate_synthase,_GTP-binding_site	adenylosuccinate_synthase_activity:GTP_binding:purine_nucleotide_biosynthetic_process:plastid:response_to_cadmium_ion:AMP_biosynthetic_process:apoplast:chloroplast:chloroplast_stroma
	AL5G39200		aly	AT3G57620	HOM04D000389	ORTHO04D000286	#N/A	#N/A
	AL5G39210		aly	AT3G57630	HOM04D003198	ORTHO04D004632	#N/A	#N/A
	AL5G39220		aly	AT3G57640	HOM04D000022	ORTHO04D010582	#N/A	protein_kinase_activity:ATP_binding:protein_phosphorylation
	AL5G39230		aly	#N/A	HOM04D001077	ORTHO04D013583	#N/A	peroxisome:regulation_of_gene_expression
	AL5G39240		aly	#N/A	HOM04D001077	ORTHO04D013583	#N/A	peroxisome:regulation_of_gene_expression
	AL5G39260		aly	#N/A	HOM04D001077	ORTHO04D011567	#N/A	peroxisome:regulation_of_gene_expression
	AL5G39270		aly	AT3G57650	HOM04D001032	ORTHO04D002687	#N/A	metabolic_process:transferase_activity,_transferring_acyl_groups:1-acylglycerol-3-phosphate_O-acyltransferase_activity:endoplasmic_reticulum
	AL5G39280		aly	AT3G57660	HOM04D000760	ORTHO04D005058	DNA-directed_RNA_pol_I,_largest_subunit	DNA-directed_5'-3'_RNA_polymerase_activity:nucleus:transcription,_DNA-templated:zinc_ion_binding:DNA_binding:plasmodesma
	AL5G39290		aly	AT3G57670	HOM04D000654	ORTHO04D000494	#N/A	nucleic_acid_binding:cell_fate_determination:transmitting_tissue_development:regulation_of_transcription,_DNA-templated:regulation_of_gene_expression:primary_root_development:pollen_tube_growth:fruit_replum_development:nucleus
	Carubv10016977m.g		cru	AT3G57530	HOM04D000039	ORTHO04D000572	calcium_ion_binding:protein_kinase_activity:ATP_binding:protein_phosphorylation:calcium-dependent_protein_kinase_C_activity:plasma_membrane:cytoplasm:response_to_salt_stress:plasmodesma:response_to_abscisic_acid:protein_binding:abscisic_acid-activated_signaling_pathway:nucleus	EF-hand_domain:Protein_kinase_domain:Protein_kinase,_ATP_binding_site:Protein_kinase-like_domain:Serine/threonine-protein_kinase,_active_site:EF-hand_domain_pair:EF-Hand_1,_calcium-binding_site
	Carubv10019640m.g		cru	AT3G57540	HOM04D004328	#N/A	plasma_membrane:negative_regulation_of_brassinosteroid_mediated_signaling_pathway:abscisic_acid-activated_signaling_pathway	Remorin,_C-terminal
	Carubv10017419m.g		cru	AT3G57550	HOM04D003151	#N/A	guanylate_kinase_activity:purine_nucleotide_metabolic_process:nucleotide_metabolic_process:regulation_of_developmental_growth:gametophyte_development	Guanylate_kinase,_conserved_site:Guanylate_kinase:P-loop_containing_nucleoside_triphosphate_hydrolase:Galactose_oxidase/kelch,_beta-propeller:Guanylate_kinase/L-type_calcium_channel_beta_subunit:Guanylate_kinase-like_domain
	Carubv10019137m.g		cru	AT3G57560	HOM04D004822	#N/A	acetylglutamate_kinase_activity:cytoplasm:arginine_biosynthetic_process:chloroplast_thylakoid:arginine_biosynthetic_process_via_ornithine:protein_binding:chloroplast:arginine_binding	Acetylglutamate_kinase:Glutamate/acetylglutamate_kinase:Aspartate/glutamate/uridylate_kinase
	Carubv10016664m.g		cru	AT3G57570	HOM04D005651	#N/A	binding	Armadillo-type_fold:Armadillo-like_helical
WSB	Carubv10017800m.g		cru	AT3G57600	HOM04D000166	ORTHO04D000506	transcription_factor_activity,_sequence-specific_DNA_binding:regulation_of_transcription,_DNA-templated:DNA_binding	DNA-binding_domain:AP2/ERF_transcription_factor_ERF/PTI6:AP2/ERF_domain
	Carubv10017040m.g		cru	AT3G57610	HOM04D003535	#N/A	adenylosuccinate_synthase_activity:GTP_binding:purine_nucleotide_biosynthetic_process:plastid:response_to_cadmium_ion:AMP_biosynthetic_process:apoplast:chloroplast:chloroplast_stroma	P-loop_containing_nucleoside_triphosphate_hydrolase:Adenylosuccinate_synthetase:Adenylosuccinate_synthase,__active_site:Adenylosuccinate_synthase,_GTP-binding_site
	Carubv10019204m.g		cru	AT3G57620	HOM04D000389	#N/A	#N/A	Immunoglobulin_E-set:Glyoxal_oxidase,_N-terminal:Domain_of_unknown_function_DUF1929:Galactose_oxidase,_beta-propeller:Galactose_oxidase/kelch,_beta-propeller:Immunoglobulin-like_fold
	Carubv10016706m.g		cru	AT3G57630	HOM04D003198	#N/A	#N/A	Exostosin-like:EGF-like_domain:EGF-like,_conserved_site
	Carubv10017420m.g		cru	AT3G57650	HOM04D001032	ORTHO04D002687	metabolic_process:transferase_activity,_transferring_acyl_groups:endoplasmic_reticulum:1-acylglycerol-3-phosphate_O-acyltransferase_activity	Phospholipid/glycerol_acyltransferase:Acyltransferase,_C-terminal_domain
	Carubv10016563m.g		cru	AT3G57660	HOM04D000760	ORTHO04D005058	DNA-directed_5'-3'_RNA_polymerase_activity:nucleus:transcription,_DNA-templated:zinc_ion_binding:DNA_binding:plasmodesma	RNA_polymerase,_N-terminal:RNA_polymerase,_alpha_subunit:RNA_polymerase_Rpb1,_domain_4:RNA_polymerase_Rpb1,_domain_5:RNA_polymerase_Rpb1,_domain_1:RNA_polymerase_Rpb1,_domain_3:DNA-directed_RNA_pol_I,_largest_subunit
	Carubv10017428m.g		cru	AT3G57670	HOM04D000654	#N/A	nucleic_acid_binding:nucleus:fruit_replum_development:pollen_tube_growth:primary_root_development:regulation_of_gene_expression:regulation_of_transcription,_DNA-templated:transmitting_tissue_development:cell_fate_determination	Zinc_finger_C2H2-type
	Brara.D00275		bra	AT3G57670	HOM04D000654	#N/A	nucleic_acid_binding	Zinc_finger_C2H2-type
	Brara.D00276		bra	AT3G57650	HOM04D001032	ORTHO04D002687	metabolic_process:transferase_activity,_transferring_acyl_groups	Phospholipid/glycerol_acyltransferase:Acyltransferase,_C-terminal_domain
	Brara.D00277		bra	AT3G57610	HOM04D003535	#N/A	adenylosuccinate_synthase_activity:GTP_binding:purine_nucleotide_biosynthetic_process:plastid:response_to_cadmium_ion:AMP_biosynthetic_process:apoplast:chloroplast:chloroplast_stroma	P-loop_containing_nucleoside_triphosphate_hydrolase:Adenylosuccinate_synthetase:Adenylosuccinate_synthase,__active_site:Adenylosuccinate_synthase,_GTP-binding_site
WSB	Brara.D00278		bra	AT3G57600	HOM04D000166	ORTHO04D000506	transcription_factor_activity,_sequence-specific_DNA_binding:regulation_of_transcription,_DNA-templated:DNA_binding	DNA-binding_domain:AP2/ERF_domain
	Brara.D00279		bra	AT3G57560	HOM04D004822	#N/A	acetylglutamate_kinase_activity:cytoplasm:arginine_biosynthetic_process:chloroplast_thylakoid:arginine_biosynthetic_process_via_ornithine:protein_binding:chloroplast:arginine_binding	Acetylglutamate_kinase:Glutamate/acetylglutamate_kinase:Aspartate/glutamate/uridylate_kinase
	Brara.D00280		bra	AT3G57550	HOM04D003151	#N/A	guanylate_kinase_activity:purine_nucleotide_metabolic_process:nucleotide_metabolic_process:regulation_of_developmental_growth:gametophyte_development	Guanylate_kinase,_conserved_site:Guanylate_kinase:P-loop_containing_nucleoside_triphosphate_hydrolase:Galactose_oxidase/kelch,_beta-propeller:Guanylate_kinase/L-type_calcium_channel_beta_subunit:Guanylate_kinase-like_domain
	Brara.G01743		bra	AT3G57530	HOM04D000039	ORTHO04D000572	calcium_ion_binding:protein_kinase_activity:ATP_binding:protein_phosphorylation	EF-hand_domain:Protein_kinase_domain:Protein_kinase,_ATP_binding_site:Protein_kinase-like_domain:Serine/threonine-protein_kinase,_active_site:EF-hand_domain_pair:EF-Hand_1,_calcium-binding_site
	Brara.G01744		bra	AT3G57550	HOM04D003151	#N/A	guanylate_kinase_activity:purine_nucleotide_metabolic_process:nucleotide_metabolic_process:regulation_of_developmental_growth:gametophyte_development	Guanylate_kinase,_conserved_site:Guanylate_kinase:P-loop_containing_nucleoside_triphosphate_hydrolase:Galactose_oxidase/kelch,_beta-propeller:Guanylate_kinase/L-type_calcium_channel_beta_subunit:Guanylate_kinase-like_domain
	Brara.G01745		bra	#N/A	HOM04D032950	#N/A	#N/A	#N/A
	Brara.G01746		bra	AT3G57610	HOM04D003535	#N/A	adenylosuccinate_synthase_activity:GTP_binding:purine_nucleotide_biosynthetic_process:plastid:response_to_cadmium_ion:AMP_biosynthetic_process:apoplast:chloroplast:chloroplast_stroma	P-loop_containing_nucleoside_triphosphate_hydrolase:Adenylosuccinate_synthetase:Adenylosuccinate_synthase,__active_site:Adenylosuccinate_synthase,_GTP-binding_site
	Brara.G01747		bra	#N/A	HOM04D000133	#N/A	#N/A	Neprosin:Neprosin_activation_peptide
	Brara.G01748		bra	AT3G57650	HOM04D001032	ORTHO04D002687	metabolic_process:transferase_activity,_transferring_acyl_groups:endoplasmic_reticulum:1-acylglycerol-3-phosphate_O-acyltransferase_activity	Phospholipid/glycerol_acyltransferase:Acyltransferase,_C-terminal_domain
	Brara.G01749		bra	#N/A	HOM04D000094	ORTHO04D006937	electron_carrier_activity	Phytocyanin_domain:Cupredoxin
	Brara.G01750		bra	AT3G57660	HOM04D000760	ORTHO04D005058	DNA-directed_5'-3'_RNA_polymerase_activity:nucleus:transcription,_DNA-templated:zinc_ion_binding:DNA_binding	RNA_polymerase,_N-terminal:RNA_polymerase,_alpha_subunit:RNA_polymerase_Rpb1,_domain_1:DNA-directed_RNA_pol_I,_largest_subunit
	Brara.G01751		bra	#N/A	HOM04D000760	ORTHO04D005058	DNA-directed_5'-3'_RNA_polymerase_activity:nucleus:transcription,_DNA-templated:zinc_ion_binding:DNA_binding	RNA_polymerase_Rpb1,_domain_4:RNA_polymerase_Rpb1,_domain_5:DNA-directed_RNA_pol_I,_largest_subunit
	Brara.G01752		bra	AT3G57670	HOM04D000654	#N/A	nucleic_acid_binding:cell_fate_determination:transmitting_tissue_development:regulation_of_gene_expression:regulation_of_transcription,_DNA-templated:primary_root_development:pollen_tube_growth:nucleus:fruit_replum_development	Zinc_finger,_RING/FYVE/PHD-type:Zinc_finger_C2H2-type
	Brara.I03972		bra	AT3G57530	HOM04D000039	ORTHO04D000572	calcium_ion_binding:protein_kinase_activity:ATP_binding:protein_phosphorylation:calcium-dependent_protein_kinase_C_activity:cytoplasm:plasma_membrane:response_to_salt_stress:plasmodesma:protein_binding:response_to_abscisic_acid:abscisic_acid-activated_signaling_pathway:nucleus	EF-hand_domain:Protein_kinase_domain:Protein_kinase,_ATP_binding_site:Protein_kinase-like_domain:Serine/threonine-protein_kinase,_active_site:EF-hand_domain_pair:EF-Hand_1,_calcium-binding_site
	Brara.I03973		bra	AT3G57540	HOM04D004328	#N/A	plasma_membrane:negative_regulation_of_brassinosteroid_mediated_signaling_pathway:abscisic_acid-activated_signaling_pathway	Remorin,_C-terminal
	Brara.I03974		bra	AT3G57550	HOM04D003151	#N/A	guanylate_kinase_activity:purine_nucleotide_metabolic_process:nucleotide_metabolic_process:gametophyte_development:regulation_of_developmental_growth	Guanylate_kinase,_conserved_site:Guanylate_kinase:P-loop_containing_nucleoside_triphosphate_hydrolase:Galactose_oxidase/kelch,_beta-propeller:Guanylate_kinase/L-type_calcium_channel_beta_subunit:Guanylate_kinase-like_domain
	Brara.I03975		bra	AT3G57560	HOM04D004822	#N/A	acetylglutamate_kinase_activity:cytoplasm:arginine_biosynthetic_process:chloroplast_thylakoid:arginine_biosynthetic_process_via_ornithine:protein_binding:chloroplast:arginine_binding	Acetylglutamate_kinase:Glutamate/acetylglutamate_kinase:Aspartate/glutamate/uridylate_kinase
	Brara.I03976		bra	#N/A	HOM04D004799	ORTHO04D063354	signal_transducer_activity:regulation_of_transcription,_DNA-templated:signal_transduction:transcription_factor_activity,_sequence-specific_DNA_binding:nucleus	#N/A
	Brara.I03977		bra	#N/A	HOM04D080252	#N/A	#N/A	#N/A
	Brara.I03978		bra	#N/A	HOM04D005651	#N/A	binding	Armadillo-type_fold:Armadillo-like_helical
WSB	Brara.I03979		bra	AT3G57600	HOM04D000166	ORTHO04D000506	transcription_factor_activity,_sequence-specific_DNA_binding:regulation_of_transcription,_DNA-templated:DNA_binding	DNA-binding_domain:AP2/ERF_transcription_factor_ERF/PTI6:AP2/ERF_domain
	Brara.I03980		bra	AT3G57610	HOM04D003535	#N/A	adenylosuccinate_synthase_activity:GTP_binding:purine_nucleotide_biosynthetic_process:plastid:response_to_cadmium_ion:AMP_biosynthetic_process:apoplast:chloroplast:chloroplast_stroma	P-loop_containing_nucleoside_triphosphate_hydrolase:Adenylosuccinate_synthetase:Adenylosuccinate_synthase,__active_site:Adenylosuccinate_synthase,_GTP-binding_site
	Brara.I03981		bra	AT3G57630	HOM04D003198	#N/A	#N/A	Exostosin-like:EGF-like_domain:EGF-like,_conserved_site
	Brara.I03982		bra	AT3G57650	HOM04D001032	ORTHO04D002687	metabolic_process:transferase_activity,_transferring_acyl_groups:endoplasmic_reticulum:1-acylglycerol-3-phosphate_O-acyltransferase_activity	Phospholipid/glycerol_acyltransferase:Acyltransferase,_C-terminal_domain
	Brara.I03983		bra	AT3G57660	HOM04D000760	ORTHO04D005058	DNA-directed_5'-3'_RNA_polymerase_activity:nucleus:transcription,_DNA-templated:zinc_ion_binding:DNA_binding:plasmodesma	RNA_polymerase,_N-terminal:RNA_polymerase,_alpha_subunit:RNA_polymerase_Rpb1,_domain_4:RNA_polymerase_Rpb1,_domain_5:RNA_polymerase_Rpb1,_domain_1:RNA_polymerase_Rpb1,_domain_3:DNA-directed_RNA_pol_I,_largest_subunit
	Brara.I03984		bra	AT3G57670	HOM04D000654	#N/A	nucleic_acid_binding	Zinc_finger_C2H2-type
	Bo8g091950		bol	AT3G57530	HOM04D000039	ORTHO04D000572	#N/A	calcium_ion_binding:protein_kinase_activity:ATP_binding:protein_phosphorylation:calcium-dependent_protein_kinase_C_activity:plasma_membrane:cytoplasm:response_to_salt_stress:plasmodesma:response_to_abscisic_acid:protein_binding:abscisic_acid-activated_signaling_pathway:nucleus	EF-hand_domain:Protein_kinase_domain:Protein_kinase,_ATP_binding_site:Protein_kinase-like_domain:Serine/threonine-protein_kinase,_active_site:EF-hand_domain_pair:EF-Hand_1,_calcium-binding_site
	Bo8g091960		bol	AT3G57540	HOM04D004328	#N/A	Remorin family protein	plasma_membrane:negative_regulation_of_brassinosteroid_mediated_signaling_pathway:abscisic_acid-activated_signaling_pathway	Remorin,_C-terminal
	Bo8g091970		bol	#N/A	HOM04D001163	#N/A	#N/A	zinc_ion_binding:nucleic_acid_binding	Domain_of_unknown_function_DUF4283
	Bo8g091980		bol	AT3G57550	HOM04D003151	#N/A	#N/A	guanylate_kinase_activity:purine_nucleotide_metabolic_process:nucleotide_metabolic_process:regulation_of_developmental_growth:gametophyte_development	Guanylate_kinase,_conserved_site:Guanylate_kinase:P-loop_containing_nucleoside_triphosphate_hydrolase:Galactose_oxidase/kelch,_beta-propeller:Guanylate_kinase/L-type_calcium_channel_beta_subunit:Guanylate_kinase-like_domain
	Bo8g091990		bol	AT3G57560	HOM04D004822	#N/A	N-acetyl-l-glutamate kinase	acetylglutamate_kinase_activity:cytoplasm:arginine_biosynthetic_process:proline_biosynthetic_process:chloroplast_thylakoid:arginine_biosynthetic_process_via_ornithine:protein_binding:chloroplast:arginine_binding	Acetylglutamate_kinase:Glutamate/acetylglutamate_kinase:Aspartate/glutamate/uridylate_kinase
	Bo8g092000		bol	AT3G57570	HOM04D005651	#N/A	ARM repeat superfamily protein	binding	Armadillo-type_fold:Armadillo-like_helical
WSB	Bo8g092010		bol	AT3G57600	HOM04D000166	ORTHO04D000506	#N/A	transcription_factor_activity,_sequence-specific_DNA_binding:regulation_of_transcription,_DNA-templated:DNA_binding:nucleus:transcription,_DNA-templated	DNA-binding_domain:AP2/ERF_domain
	Bo8g092020		bol	AT3G57610	HOM04D003535	#N/A	Adenylosuccinate synthetase, chloroplastic	adenylosuccinate_synthase_activity:GTP_binding:purine_nucleotide_biosynthetic_process:chloroplast:magnesium_ion_binding:de_novo'_AMP_biosynthetic_process:plastid:response_to_cadmium_ion:AMP_biosynthetic_process:apoplast:chloroplast_stroma	P-loop_containing_nucleoside_triphosphate_hydrolase:Adenylosuccinate_synthetase:Adenylosuccinate_synthase,__active_site:Adenylosuccinate_synthase,_GTP-binding_site
	Bo8g092030		bol	AT3G57630	HOM04D003198	#N/A	exostosin family protein	integral_component_of_membrane	Exostosin-like:EGF-like_domain:EGF-like,_conserved_site
	Bo8g092040		bol	#N/A	HOM04D167044	#N/A	#N/A	#N/A	#N/A
	Bo8g092050		bol	AT3G57650	HOM04D001032	ORTHO04D002687	#N/A	metabolic_process:transferase_activity,_transferring_acyl_groups:integral_component_of_membrane:1-acylglycerol-3-phosphate_O-acyltransferase_activity:endoplasmic_reticulum	Phospholipid/glycerol_acyltransferase:Acyltransferase,_C-terminal_domain
	Bo8g092060		bol	AT3G57660	HOM04D000760	ORTHO04D005058	DNA-directed RNA polymerase subunit	DNA-directed_5'-3'_RNA_polymerase_activity:nucleus:transcription,_DNA-templated:zinc_ion_binding:DNA_binding:plasmodesma	RNA_polymerase,_N-terminal:RNA_polymerase,_alpha_subunit:RNA_polymerase_Rpb1,_domain_4:RNA_polymerase_Rpb1,_domain_5:RNA_polymerase_Rpb1,_domain_1:RNA_polymerase_Rpb1,_domain_3:DNA-directed_RNA_pol_I,_largest_subunit
	Bo8g092070		bol	AT3G57670	HOM04D000654	#N/A	#N/A	nucleic_acid_binding	Zinc_finger_C2H2-type
	Bo6g072980		bol	#N/A	HOM04D000039	ORTHO04D000572	#N/A	calcium_ion_binding:protein_kinase_activity:ATP_binding:protein_phosphorylation	EF-hand_domain:Protein_kinase_domain:Protein_kinase,_ATP_binding_site:Protein_kinase-like_domain:Serine/threonine-protein_kinase,_active_site:EF-hand_domain_pair:EF-Hand_1,_calcium-binding_site
	Bo6g072990		bol	AT3G57550	HOM04D003151	#N/A	#N/A	guanylate_kinase_activity:purine_nucleotide_metabolic_process:nucleotide_metabolic_process:regulation_of_developmental_growth:gametophyte_development	Transposase,_MuDR,_plant:Guanylate_kinase,_conserved_site:Guanylate_kinase:P-loop_containing_nucleoside_triphosphate_hydrolase:Guanylate_kinase/L-type_calcium_channel_beta_subunit:Guanylate_kinase-like_domain
	Bo6g073000		bol	#N/A	HOM04D032950	#N/A	#N/A	integral_component_of_membrane	#N/A
	Bo6g073010		bol	#N/A	HOM04D001853	#N/A	#N/A	#N/A	#N/A
WSB	Bo6g073020		bol	AT3G57600	HOM04D000166	ORTHO04D000506	#N/A	transcription_factor_activity,_sequence-specific_DNA_binding:regulation_of_transcription,_DNA-templated:DNA_binding:nucleus:transcription,_DNA-templated	DNA-binding_domain:AP2/ERF_domain
	Bo6g073030		bol	AT3G57610	HOM04D003535	#N/A	Adenylosuccinate synthetase, chloroplastic	adenylosuccinate_synthase_activity:GTP_binding:purine_nucleotide_biosynthetic_process:chloroplast:magnesium_ion_binding:de_novo'_AMP_biosynthetic_process:plastid:response_to_cadmium_ion:AMP_biosynthetic_process:apoplast:chloroplast_stroma	P-loop_containing_nucleoside_triphosphate_hydrolase:Adenylosuccinate_synthetase:Adenylosuccinate_synthase,__active_site:Adenylosuccinate_synthase,_GTP-binding_site
	Bo6g073040		bol	#N/A	HOM04D000133	#N/A	#N/A	#N/A	Neprosin
	Bo6g073050		bol	AT3G57640	HOM04D000022	ORTHO04D010582	#N/A	protein_kinase_activity:protein_phosphorylation:ATP_binding	Protein_kinase-like_domain
	Bo6g073060		bol	AT3G57650	HOM04D001032	ORTHO04D002687	#N/A	metabolic_process:transferase_activity,_transferring_acyl_groups:integral_component_of_membrane:endoplasmic_reticulum:1-acylglycerol-3-phosphate_O-acyltransferase_activity	Phospholipid/glycerol_acyltransferase:Acyltransferase,_C-terminal_domain
	Bo6g073070		bol	#N/A	HOM04D000094	ORTHO04D006937	#N/A	electron_carrier_activity:integral_component_of_membrane	Phytocyanin_domain:Cupredoxin
	Bo6g073080		bol	#N/A	HOM04D001762	ORTHO04D059916	#N/A	#N/A	#N/A
	Bo6g073090		bol	#N/A	HOM04D000558	ORTHO04D060794	#N/A	malate_dehydrogenase_(decarboxylating)_(NAD+)_activity:oxidation-reduction_process:malic_enzyme_activity:NAD_binding	Malic_enzyme,_N-terminal_domain
	Bo6g073100		bol	AT3G57660	HOM04D000760	ORTHO04D005058	#N/A	DNA-directed_5'-3'_RNA_polymerase_activity:nucleus:transcription,_DNA-templated:zinc_ion_binding:DNA_binding	RNA_polymerase_Rpb1,_domain_4:RNA_polymerase_Rpb1,_domain_5:DNA-directed_RNA_pol_I,_largest_subunit
	Bo6g073110		bol	#N/A	HOM04D000485	#N/A	#N/A	#N/A	Probable_transposase,_Ptta/En/Spm,_plant
	Bo6g073120		bol	AT3G57670	HOM04D000654	#N/A	#N/A	nucleic_acid_binding:cell_fate_determination:regulation_of_transcription,_DNA-templated:transmitting_tissue_development:regulation_of_gene_expression:primary_root_development:pollen_tube_growth:fruit_replum_development:nucleus	Zinc_finger_C2H2-type
	Bo4g111000		bol	AT3G57670	HOM04D000654	#N/A	#N/A	nucleic_acid_binding	Zinc_finger_C2H2-type
	Bo4g111010		bol	AT3G57650	HOM04D001032	ORTHO04D059619	#N/A	metabolic_process:transferase_activity,_transferring_acyl_groups	Phospholipid/glycerol_acyltransferase
	Bo4g111020		bol	#N/A	HOM04D000048	#N/A	#N/A	hydrolase_activity,_acting_on_ester_bonds	Harbinger_transposase-derived_protein:No_apical_meristem-associated,_C-terminal_domain
	Bo4g111030		bol	AT3G57610	HOM04D003535	#N/A	Adenylosuccinate synthetase, chloroplastic	adenylosuccinate_synthase_activity:GTP_binding:purine_nucleotide_biosynthetic_process:chloroplast:magnesium_ion_binding:de_novo'_AMP_biosynthetic_process:plastid:response_to_cadmium_ion:AMP_biosynthetic_process:apoplast:chloroplast_stroma	P-loop_containing_nucleoside_triphosphate_hydrolase:Adenylosuccinate_synthetase:Adenylosuccinate_synthase,__active_site:Adenylosuccinate_synthase,_GTP-binding_site
WSB	Bo4g111040		bol	AT3G57600	HOM04D000166	ORTHO04D000506	#N/A	transcription_factor_activity,_sequence-specific_DNA_binding:regulation_of_transcription,_DNA-templated:DNA_binding:nucleus:transcription,_DNA-templated	DNA-binding_domain:AP2/ERF_domain
	Bo4g111050		bol	AT3G57560	HOM04D004822	#N/A	#N/A	acetylglutamate_kinase_activity:cytoplasm:arginine_biosynthetic_process:proline_biosynthetic_process:chloroplast_thylakoid:arginine_biosynthetic_process_via_ornithine:protein_binding:chloroplast:arginine_binding	Acetylglutamate_kinase:Glutamate/acetylglutamate_kinase:Aspartate/glutamate/uridylate_kinase
	Bo4g111060		bol	AT3G57550	HOM04D003151	#N/A	#N/A	guanylate_kinase_activity:purine_nucleotide_metabolic_process:nucleotide_metabolic_process:regulation_of_developmental_growth:gametophyte_development	Guanylate_kinase,_conserved_site:Guanylate_kinase:P-loop_containing_nucleoside_triphosphate_hydrolase:Galactose_oxidase/kelch,_beta-propeller:Guanylate_kinase/L-type_calcium_channel_beta_subunit:Guanylate_kinase-like_domain
	Bo4g111070		bol	#N/A	HOM04D001082	#N/A	#N/A	protein_dimerization_activity:nucleic_acid_binding	Ribonuclease_H-like_domain:Domain_of_unknown_function_DUF4371:HAT,_C-terminal_dimerisation_domain
	Bo4g111080		bol	#N/A	HOM04D000449	ORTHO04D012440	#N/A	protein_binding:catalytic_activity	IQ_motif,_EF-hand_binding_site
	Bo4g111090		bol	#N/A	HOM04D000369	#N/A	#N/A	#N/A	#N/A
	Tp5g04960		spa	AT3G57670	HOM04D000654	#N/A	NTT_(NO_TRANSMITTING_TRACT)	nucleic_acid_binding:cell_fate_determination:transmitting_tissue_development:regulation_of_gene_expression:regulation_of_transcription,_DNA-templated:primary_root_development:fruit_replum_development:pollen_tube_growth:nucleus	Zinc_finger,_RING/FYVE/PHD-type:Zinc_finger_C2H2-type
	Tp5g04970		spa	AT3G57660	HOM04D000760	ORTHO04D005058	NRPA1	DNA-directed_5'-3'_RNA_polymerase_activity:nucleus:transcription,_DNA-templated:zinc_ion_binding:DNA_binding:plasmodesma	RNA_polymerase,_N-terminal:RNA_polymerase,_alpha_subunit:RNA_polymerase_Rpb1,_domain_4:RNA_polymerase_Rpb1,_domain_5:RNA_polymerase_Rpb1,_domain_1:RNA_polymerase_Rpb1,_domain_3:DNA-directed_RNA_pol_I,_largest_subunit
	Tp5g04980		spa	AT3G57650	HOM04D001032	ORTHO04D002687	LPAT2	metabolic_process:transferase_activity,_transferring_acyl_groups:endoplasmic_reticulum:1-acylglycerol-3-phosphate_O-acyltransferase_activity	Phospholipid/glycerol_acyltransferase:Acyltransferase,_C-terminal_domain
	Tp5g04990		spa	AT3G57630	HOM04D003198	#N/A	exostosin_family_protein	#N/A	Exostosin-like:EGF-like_domain:EGF-like,_conserved_site
	Tp5g05000		spa	AT3G57610	HOM04D003535	#N/A	ADSS_(ADENYLOSUCCINATE_SYNTHASE)	adenylosuccinate_synthase_activity:GTP_binding:purine_nucleotide_biosynthetic_process:plastid:response_to_cadmium_ion:AMP_biosynthetic_process:apoplast:chloroplast:chloroplast_stroma	P-loop_containing_nucleoside_triphosphate_hydrolase:Adenylosuccinate_synthetase:Adenylosuccinate_synthase,__active_site:Adenylosuccinate_synthase,_GTP-binding_site
WSB	Tp5g05010		spa	AT3G57600	HOM04D000166	ORTHO04D000506	AP2_domain-containing_transcription_factor;_putative	transcription_factor_activity,_sequence-specific_DNA_binding:regulation_of_transcription,_DNA-templated:DNA_binding	DNA-binding_domain:AP2/ERF_domain
	Tp5g05020		spa	AT3G57570	HOM04D005651	#N/A	binding	binding	Armadillo-type_fold:Armadillo-like_helical
	Tp5g05030		spa	AT3G57560	HOM04D004822	#N/A	aspartate/glutamate/uridylate_kinase_family_protein	acetylglutamate_kinase_activity:cytoplasm:arginine_biosynthetic_process:chloroplast_thylakoid:arginine_biosynthetic_process_via_ornithine:protein_binding:chloroplast:arginine_binding	Acetylglutamate_kinase:Glutamate/acetylglutamate_kinase:Aspartate/glutamate/uridylate_kinase
	Tp5g05040		spa	AT3G57550	HOM04D003151	#N/A	AGK2_(GUANYLATE_KINASE)	guanylate_kinase_activity:purine_nucleotide_metabolic_process:nucleotide_metabolic_process:regulation_of_developmental_growth:gametophyte_development	Guanylate_kinase,_conserved_site:Guanylate_kinase:P-loop_containing_nucleoside_triphosphate_hydrolase:Galactose_oxidase/kelch,_beta-propeller:Guanylate_kinase/L-type_calcium_channel_beta_subunit:Guanylate_kinase-like_domain
	Tp5g05050		spa	AT3G57540	HOM04D004328	#N/A	remorin_family_protein	plasma_membrane:negative_regulation_of_brassinosteroid_mediated_signaling_pathway:abscisic_acid-activated_signaling_pathway	Remorin,_C-terminal
	Tp5g05060		spa	AT3G57530	HOM04D000039	ORTHO04D000572	CPK32_(CALCIUM-DEPENDENT_PROTEIN_KINASE_32)	calcium_ion_binding:protein_kinase_activity:ATP_binding:protein_phosphorylation:calcium-dependent_protein_kinase_C_activity:cytoplasm:plasma_membrane:response_to_salt_stress:response_to_abscisic_acid:plasmodesma:protein_binding:nucleus:abscisic_acid-activated_signaling_pathway	EF-hand_domain:Protein_kinase_domain:Protein_kinase,_ATP_binding_site:Protein_kinase-like_domain:Serine/threonine-protein_kinase,_active_site:EF-hand_domain_pair:EF-Hand_1,_calcium-binding_site
	THA.LOC104802201		tha	AT3G57530	HOM04D000039	ORTHO04D000572	calcium-dependent_protein_kinase_32	calcium_ion_binding:protein_kinase_activity:ATP_binding:protein_phosphorylation:calcium-dependent_protein_kinase_C_activity:plasma_membrane:cytoplasm:response_to_salt_stress:plasmodesma:response_to_abscisic_acid:protein_binding:abscisic_acid-activated_signaling_pathway:nucleus	EF-hand_domain:Protein_kinase_domain:Protein_kinase,_ATP_binding_site:Protein_kinase-like_domain:Serine/threonine-protein_kinase,_active_site:EF-hand_domain_pair:EF-Hand_1,_calcium-binding_site	THA.XM_010525685.2
	THA.LOC104802203		tha	#N/A	HOM04D000577	#N/A	zinc_finger_CCCH_domain-containing_protein_32-like	metal_ion_binding:mRNA_binding	Zinc_finger,_CCCH-type	THA.XM_010525683.2
	THA.LOC104802204		tha	#N/A	HOM04D000492	#N/A	protein_TRANSPORT_INHIBITOR_RESPONSE_1	protein_binding:lateral_root_formation:cellular_response_to_phosphate_starvation:SCF_ubiquitin_ligase_complex:cellular_response_to_nitrate:stamen_development:ubiquitin_ligase_complex:nucleus:ubiquitin-protein_transferase_activity:lateral_root_development:response_to_auxin:ubiquitin-dependent_protein_catabolic_process:auxin-activated_signaling_pathway:vacuolar_membrane:developmental_growth:nuclear…	Leucine-rich_repeat_domain,_L_domain-like:Leucine-rich_repeat:F-box_domain	THA.XM_010525688.2
	THA.LOC104802206		tha	#N/A	HOM04D000121	#N/A	glutaredoxin-C14-like	electron_carrier_activity:protein_disulfide_oxidoreductase_activity:cell_redox_homeostasis	Glutaredoxin:Glutaredoxin_subgroup:Thioredoxin-like_fold:Glutaredoxin-like,_plant_II	THA.XM_010525690.1
	THA.LOC104802207		tha	#N/A	HOM04D000121	#N/A	glutaredoxin-C11-like	electron_carrier_activity:protein_disulfide_oxidoreductase_activity:cell_redox_homeostasis	Glutaredoxin:Thioredoxin-like_fold:Glutaredoxin-like,_plant_II	THA.XM_010525691.1
	THA.LOC104802208		tha	AT3G57550	HOM04D003151	#N/A	guanylate_kinase_2	protein_binding:guanylate_kinase_activity:purine_nucleotide_metabolic_process:nucleotide_metabolic_process:gametophyte_development:regulation_of_developmental_growth	Guanylate_kinase,_conserved_site:Guanylate_kinase:P-loop_containing_nucleoside_triphosphate_hydrolase:Kelch-type_beta_propeller:Galactose_oxidase/kelch,_beta-propeller:Guanylate_kinase/L-type_calcium_channel_beta_subunit:Guanylate_kinase-like_domain	THA.XM_010525695.2
	THA.LOC104802209		tha	#N/A	HOM04D005117	#N/A	OTU_domain-containing_protein_6B	cytosol	OTU_domain	THA.XM_010525692.2
	THA.LOC104802210		tha	#N/A	HOM04D000445	#N/A	tubby-like_F-box_protein_3	protein_binding:plastid:plasma_membrane:response_to_fungus:response_to_hydrogen_peroxide:cytosol:regulation_of_transcription,_DNA-templated:cellular_response_to_osmotic_stress:response_to_salt_stress:nucleus	Tubby,_C-terminal:Tubby_C-terminal-like_domain:F-box_domain:Tubby,_C-terminal,_conserved_site	THA.XM_010525693.2
	THA.LOC104802212		tha	#N/A	HOM04D000032	ORTHO04D000260	peroxidase_3-like	peroxidase_activity:hydrogen_peroxide_catabolic_process:response_to_oxidative_stress:heme_binding:oxidation-reduction_process	Haem_peroxidase,_plant/fungal/bacterial:Plant_peroxidase:Haem_peroxidase:Peroxidases_heam-ligand_binding_site:Secretory_peroxidase	THA.XM_010525696.2
	THA.LOC104802213		tha	#N/A	HOM04D005592	#N/A	protein_SLOW_WALKER_1	protein_binding:nucleolus:rRNA_processing:megagametogenesis:embryo_sac_development	U3_small_nucleolar_RNA-associated_protein_15,_C-terminal:G-protein_beta_WD-40_repeat:WD40-repeat-containing_domain:WD40/YVTN_repeat-like-containing_domain:WD40_repeat	THA.XM_010525697.2
	THA.LOC104802214		tha	#N/A	HOM04D000831	#N/A	uncharacterized_protein_LOC104802214	#N/A	#N/A	THA.XM_010525698.2
	THA.LOC104802216		tha	#N/A	HOM04D000087	ORTHO04D002271	gibberellin_receptor_GID1B-like	metabolic_process:hydrolase_activity:gibberellin_mediated_signaling_pathway:raffinose_family_oligosaccharide_biosynthetic_process:positive_regulation_of_fertilization:fruit_morphogenesis:positive_regulation_of_gibberellic_acid_mediated_signaling_pathway:protein_binding:floral_organ_morphogenesis:negative_regulation_of_gene_expression:response_to_gibberellin	Lipase,_GDXG,_putative_histidine_active_site:Alpha/Beta_hydrolase_fold:Alpha/beta_hydrolase_fold-3:Lipase,_GDXG,_putative_serine_active_site	THA.XM_010525699.2
	THA.LOC104802217		tha	#N/A	HOM04D002784	#N/A	uncharacterized_protein_LOC104802217	#N/A	Endonuclease/exonuclease/phosphatase	THA.XM_010525700.1
	THA.LOC104802219		tha	#N/A	HOM04D001741	ORTHO04D003904	uncharacterized_protein_LOC104802219	mRNA_binding:cytosol:response_to_karrikin	Alpha-ketoglutarate-dependent_dioxygenase_AlkB-like	THA.XM_010525701.2
	THA.LOC104802220		tha	#N/A	HOM04D000041	ORTHO04D005726	G-type_lectin_S-receptor-like_serine/threonine-protein_kinase_SD3-1	protein_kinase_activity:protein_phosphorylation:recognition_of_pollen:protein_serine/threonine_kinase_activity:ATP_binding	S-receptor-like_serine/threonine-protein_kinase:Protein_kinase_domain:S-locus_glycoprotein_domain:PAN/Apple_domain:Serine-threonine/tyrosine-protein_kinase,_catalytic_domain:Bulb-type_lectin_domain:Protein_kinase-like_domain	THA.XM_010525739.2
	THA.LOC104802221		tha	#N/A	HOM04D009839	#N/A	uncharacterized_protein_LOC104802221	#N/A	#N/A	THA.XM_010525702.1
	THA.LOC104802222		tha	#N/A	HOM04D002913	#N/A	piezo-type_mechanosensitive_ion_channel_homolog	mechanically-gated_ion_channel_activity:integral_component_of_membrane	Piezo_non-specific_cation_channel,_R-Ras-binding_domain:Piezo_family	THA.XM_010525703.2
	THA.LOC104802223		tha	#N/A	HOM04D010361	#N/A	uncharacterized_protein_LOC104802223	#N/A	#N/A	THA.XM_010525704.2
	THA.LOC104802224		tha	#N/A	HOM04D010549	#N/A	uncharacterized_protein_LOC104802224	metal_ion_transport:metal_ion_binding	Heavy_metal-associated_domain,_HMA	THA.XM_010525706.1
	THA.LOC104802225		tha	#N/A	HOM04D001187	#N/A	mediator_of_RNA_polymerase_II_transcription_subunit_33B_isoform_X1	regulation_of_phenylpropanoid_metabolic_process:phenylpropanoid_metabolic_process:mediator_complex:membrane	#N/A	THA.XM_010525707.1
	THA.LOC104802226		tha	#N/A	HOM04D000686	#N/A	probable_glutathione_peroxidase_5	glutathione_peroxidase_activity:response_to_oxidative_stress:oxidation-reduction_process:plasma_membrane:embryo_development_ending_in_seed_dormancy	Thioredoxin-like_fold:Glutathione_peroxidase:Glutathione_peroxidase_conserved_site:Glutathione_peroxidase_active_site	THA.XM_010525709.2
	THA.LOC104802227		tha	#N/A	HOM04D000240	ORTHO04D000685	endochitinase_EP3	chitinase_activity:chitin_catabolic_process:cell_wall_macromolecule_catabolic_process:chitin_binding:carbohydrate_metabolic_process:plant-type_hypersensitive_response:response_to_wounding:cell_wall:response_to_bacterium:somatic_embryogenesis	Chitin-binding,_type_1,_conserved_site:Glycoside_hydrolase,_family_19:Glycoside_hydrolase,_family_19,_catalytic:Chitin-binding,_type_1:Lysozyme-like_domain	THA.XM_010525750.2
	THA.LOC104802228		tha	#N/A	HOM04D004879	#N/A	pleckstrin_homology-like_domain_family_A_member_1	#N/A	Bifunctional_inhibitor/plant_lipid_transfer_protein/seed_storage_helical_domain	THA.XM_010525711.2
	THA.LOC104802229		tha	#N/A	HOM04D000453	#N/A	adenylate_isopentenyltransferase_3%2C_chloroplastic-like	tRNA_processing:plastid:AMP_dimethylallyltransferase_activity:nucleus:cytokinin_biosynthetic_process	P-loop_containing_nucleoside_triphosphate_hydrolase:tRNA_dimethylallyltransferase	THA.XM_010525712.2
	THA.LOC104802230		tha	#N/A	HOM04D001977	#N/A	fatty-acid-binding_protein_1	flavonoid_biosynthetic_process:chalcone_isomerase_activity:intramolecular_lyase_activity:fatty_acid_metabolic_process:plastid:chloroplast_envelope:mitochondrion:fatty_acid_binding:chloroplast_stroma:chloroplast	Chalcone_isomerase:Chalcone_isomerase,_3-layer_sandwich	THA.XM_010525714.2
	THA.LOC104802231		tha	#N/A	HOM04D002355	#N/A	protein_TIME_FOR_COFFEE_isoform_X1	response_to_water_deprivation:starch_metabolic_process:developmental_process:regulation_of_circadian_rhythm:response_to_abscisic_acid:response_to_oxidative_stress:nucleus	#N/A	THA.XM_010525715.1
	THA.LOC104802232		tha	#N/A	HOM04D000227	ORTHO04D001066	probable_inactive_patatin-like_protein_9	lipid_metabolic_process:metabolic_process	Acyl_transferase/acyl_hydrolase/lysophospholipase:Patatin-like_phospholipase_domain	THA.XM_010525718.2
	THA.LOC104802234		tha	#N/A	HOM04D001152	ORTHO04D012468	late_embryogenesis_abundant_protein_50-like	response_to_water_deprivation:cellular_ion_homeostasis:seed_germination:nucleolus:cytosol:response_to_osmotic_stress:response_to_lithium_ion:response_to_abscisic_acid:nucleus	Seed_maturation_protein	THA.XM_010525719.2
	THA.LOC104802235		tha	#N/A	HOM04D000031	ORTHO04D000916	serine/threonine-protein_kinase_HT1-like_isoform_X1	protein_kinase_activity:protein_phosphorylation:ATP_binding:plasma_membrane:kinase_activity:plasmodesma	Protein_kinase_domain:Serine-threonine/tyrosine-protein_kinase,_catalytic_domain:Protein_kinase-like_domain:Serine/threonine-protein_kinase,_active_site	THA.XM_010525724.1
	THA.LOC104802236		tha	#N/A	HOM04D000696	#N/A	serine/threonine-protein_kinase_Nek4-like	protein_kinase_activity:ATP_binding:protein_phosphorylation	Protein_kinase_domain:Protein_kinase,_ATP_binding_site:Protein_kinase-like_domain:Serine/threonine-protein_kinase,_active_site	THA.XM_010525727.2
	THA.LOC104802238		tha	#N/A	HOM04D000031	ORTHO04D000916	serine/threonine-protein_kinase_HT1-like_isoform_X1	protein_kinase_activity:protein_phosphorylation:ATP_binding:plasma_membrane:kinase_activity:plasmodesma	Protein_kinase_domain:Serine-threonine/tyrosine-protein_kinase,_catalytic_domain:Protein_kinase-like_domain:Serine/threonine-protein_kinase,_active_site	THA.XM_010525734.1
	THA.LOC104802239		tha	#N/A	HOM04D000137	ORTHO04D000996	serine/threonine-protein_phosphatase_PP2A-3_catalytic_subunit	hydrolase_activity	Calcineurin-like_phosphoesterase_domain,_ApaH_type:Metallo-dependent_phosphatase-like:Serine/threonine-specific_protein_phosphatase/bis(5-nucleosyl)-tetraphosphatase	THA.XM_010525736.2
	THA.LOC104802240		tha	#N/A	HOM04D002191	#N/A	eukaryotic_translation_initiation_factor_3_subunit_C-like	RNA_binding:translation_initiation_factor_activity:eukaryotic_translation_initiation_factor_3_complex:translational_initiation:translation_initiation_factor_binding:protein_binding:mRNA_binding:cytosol:nucleus	Proteasome_component_(PCI)_domain:Eukaryotic_translation_initiation_factor_3_subunit_C:Winged_helix-turn-helix_DNA-binding_domain:Eukaryotic_translation_initiation_factor_3_subunit_C,_N-terminal_domain	THA.XM_010525737.2
	THA.LOC104802241		tha	#N/A	HOM04D004253	#N/A	sn1-specific_diacylglycerol_lipase_beta	lipid_metabolic_process	Fungal_lipase-like_domain:Alpha/Beta_hydrolase_fold	THA.XM_010525738.2
	THA.LOC104802242		tha	#N/A	HOM04D000069	ORTHO04D000395	LOB_domain-containing_protein_29-like	lateral_root_formation:nucleus	Lateral_organ_boundaries,_LOB	THA.XM_010525740.1
	THA.LOC104802243		tha	#N/A	HOM04D000069	ORTHO04D000395	LOB_domain-containing_protein_16	lateral_root_formation:positive_regulation_of_transcription,_DNA-templated:nucleus	Lateral_organ_boundaries,_LOB	THA.XM_010525741.2
	THA.LOC104802244		tha	#N/A	HOM04D004360	ORTHO04D257365	deoxyhypusine_hydroxylase	peptidyl-lysine_modification_to_peptidyl-hypusine:binding:deoxyhypusine_monooxygenase_activity	#N/A	THA.XM_010525742.2
	THA.LOC104802246		tha	#N/A	HOM04D000464	#N/A	transcriptional_regulator_SUPERMAN	nucleic_acid_binding:mitochondrion:flower_development:inflorescence_development:negative_regulation_of_transcription,_DNA-templated:transcription_factor_activity,_sequence-specific_DNA_binding:DNA_binding:positive_regulation_of_telomerase_activity:nucleus:response_to_cold:petal_development:hormone-mediated_signaling_pathway:regulation_of_cell_proliferation:plastid:formation_of_plant_organ_boundar…	Zinc_finger_C2H2-type	THA.XM_010525743.1
	THA.LOC104802247		tha	#N/A	HOM04D000207	#N/A	myosin-16_isoform_X1	motor_activity:ATP_binding:myosin_complex:protein_binding:vacuole:actin_filament-based_movement	Myosin,_N-terminal,_SH3-like:IQ_motif,_EF-hand_binding_site:P-loop_containing_nucleoside_triphosphate_hydrolase:Myosin_head,_motor_domain	THA.XM_019201234.1
	THA.LOC104802248		tha	#N/A	HOM04D002425	#N/A	basic_leucine_zipper_61-like	transcription_factor_activity,_sequence-specific_DNA_binding:regulation_of_transcription,_DNA-templated:pollen_development:positive_regulation_of_transcription,_DNA-templated:protein_binding:DNA_binding:nucleus	Basic-leucine_zipper_domain	THA.XM_010525745.2
	THA.LOC104802249		tha	#N/A	HOM04D000325	ORTHO04D001896	zinc_finger_CCCH_domain-containing_protein_30	metal_ion_binding:protein_binding:regulation_of_transcription,_DNA-templated:cytoplasm:nucleus	Ankyrin_repeat:Zinc_finger,_CCCH-type:Ankyrin_repeat-containing_domain	THA.XM_010525751.2
	THA.LOC104802250		tha	#N/A	HOM04D005272	#N/A	uncharacterized_protein_LOC104802250_isoform_X1	#N/A	#N/A	THA.XM_010525747.2
	THA.LOC104802251		tha	#N/A	HOM04D009627	#N/A	seed_biotin-containing_protein_SBP65	cytosol	#N/A	THA.XM_010525752.1
	THA.LOC104802252		tha	#N/A	HOM04D002416	#N/A	ketol-acid_reductoisomerase%2C_chloroplastic-like	oxidoreductase_activity:oxidation-reduction_process:branched-chain_amino_acid_biosynthetic_process:ketol-acid_reductoisomerase_activity:plastid:response_to_cadmium_ion:chloroplast_envelope:cell_wall:apoplast:mitochondrion:copper_ion_binding:chloroplast:chloroplast_stroma	NAD(P)-binding_domain:Ketol-acid_reductoisomerase,_plant:Acetohydroxy_acid_isomeroreductase_C-terminal:Ketol-acid_reductoisomerase:Acetohydroxy_acid_isomeroreductase,_NADPH-binding_domain:6-phosphogluconate_dehydrogenase,_domain_2:6-phosphogluconate_dehydrogenase_C-terminal_domain-like	THA.XM_010525753.1
	THA.LOC104802253		tha	#N/A	HOM04D140746	ORTHO04D306282	LOW_QUALITY_PROTEIN:_inactive_TPR_repeat-containing_thioredoxin_TTL3	protein_binding:cell_redox_homeostasis	Thioredoxin-like_fold:Tetratricopeptide_repeat:Tetratricopeptide_repeat-containing_domain:Tetratricopeptide_repeat_1:Thioredoxin_domain:Tetratricopeptide-like_helical_domain	THA.XM_010525754.2
	THA.LOC104802254		tha	#N/A	HOM04D000311	#N/A	14-3-3-like_protein_B_isoform_X1	protein_domain_specific_binding:post-embryonic_root_development:plasma_membrane:cytosol:leaf_development:cytoplasm:calcium_ion_binding:protein_phosphorylated_amino_acid_binding:chloroplast_stroma:nucleus	14-3-3_protein:14-3-3_protein,_conserved_site:14-3-3_domain	THA.XM_010525755.2
	THA.LOC104802255		tha	#N/A	HOM04D000798	#N/A	phosphoenolpyruvate_carboxylase_2	tricarboxylic_acid_cycle:phosphoenolpyruvate_carboxylase_activity:carbon_fixation:catalytic_activity:plasma_membrane:cytosol:apoplast:leaf_development:plasmodesma:chloroplast	Phosphoenolpyruvate_carboxylase,_bacterial/plant-type:Pyruvate/Phosphoenolpyruvate_kinase-like_domain:Phosphoenolpyruvate_carboxylase,_His_active_site:Phosphoenolpyruvate_carboxylase:Phosphoenolpyruvate_carboxylase,_Lys_active_site	THA.XM_010525758.2
	THA.LOC104802256		tha	#N/A	HOM04D000380	#N/A	protein_LIGHT-DEPENDENT_SHORT_HYPOCOTYLS_10-like	#N/A	ALOG_domain	THA.XM_010525760.1
	THA.LOC104802257		tha	#N/A	HOM04D000031	ORTHO04D003008	serine/threonine-protein_kinase_EDR1_isoform_X1	protein_kinase_activity:protein_phosphorylation:ATP_binding	Protein_kinase_domain:Protein_kinase,_ATP_binding_site:Serine-threonine/tyrosine-protein_kinase,_catalytic_domain:Protein_kinase-like_domain:Serine/threonine-protein_kinase,_active_site	THA.XM_010525763.1
	THA.LOC104802258		tha	#N/A	HOM04D003970	#N/A	F-box_protein_MAX2	protein_ubiquitination:shoot_system_morphogenesis:ubiquitin_ligase_complex:protein_binding:auxin_polar_transport:nucleus:response_to_water_deprivation:ubiquitin-dependent_protein_catabolic_process:cuticle_development:response_to_light_stimulus:regulation_of_meristem_structural_organization:aging:positive_regulation_of_response_to_water_deprivation:multicellular_organism_development:negative_regul…	Leucine-rich_repeat_domain,_L_domain-like	THA.XM_010525765.2
	THA.LOC104802260		tha	#N/A	HOM04D000093	#N/A	uncharacterized_protein_LOC104802260_isoform_X1	DNA_binding:regulation_of_transcription,_DNA-templated	Myb_domain,_plants:Homeobox_domain-like:Myb_domain:SANT/Myb_domain	THA.XM_010525766.2
	THA.LOC104802261		tha	#N/A	HOM04D004822	ORTHO04D007265	acetylglutamate_kinase%2C_chloroplastic	acetylglutamate_kinase_activity:cytoplasm:arginine_biosynthetic_process:chloroplast_thylakoid:arginine_biosynthetic_process_via_ornithine:protein_binding:chloroplast:arginine_binding	Acetylglutamate_kinase:Glutamate/acetylglutamate_kinase:Aspartate/glutamate/uridylate_kinase	THA.XM_010525771.2
	THA.LOC104802262		tha	#N/A	HOM04D000743	#N/A	plant_cysteine_oxidase_4	oxidoreductase_activity,_acting_on_single_donors_with_incorporation_of_molecular_oxygen,_incorporation_of_two_atoms_of_oxygen:oxidation-reduction_process	RmlC-like_jelly_roll_fold:Cysteine_oxygenase/2-aminoethanethiol_dioxygenase:RmlC-like_cupin_domain	THA.XM_010525768.1
	THA.LOC104802263		tha	#N/A	HOM04D001869	#N/A	multiprotein-bridging_factor_1b-like	sequence-specific_DNA_binding:DNA_binding:nucleolus:mRNA_binding:cytoplasm:positive_regulation_of_transcription,_DNA-templated:transcription_coactivator_activity:nucleus	Lambda_repressor-like,_DNA-binding_domain:Cro/C1-type_helix-turn-helix_domain:Multiprotein_bridging_factor_1,_N-terminal	THA.XM_010525769.2
	THA.LOC104802264		tha	#N/A	HOM04D001258	#N/A	uncharacterized_protein_LOC104802264	#N/A	Protein_of_unknown_function_DUF1685	THA.XM_010525770.1
	THA.LOC104802265		tha	#N/A	HOM04D000211	#N/A	probable_WRKY_transcription_factor_69	transcription_factor_activity,_sequence-specific_DNA_binding:regulation_of_transcription,_DNA-templated:sequence-specific_DNA_binding	WRKY_domain	THA.XM_010525772.2
	THA.LOC104802266		tha	#N/A	HOM04D003973	#N/A	elongin-A-like	nucleus:regulation_of_transcription,_DNA-templated:integral_component_of_membrane	RNA_polymerase_II_transcription_factor_SIII,_subunit_A	THA.XM_010525773.1
	THA.LOC104802267		tha	#N/A	HOM04D002872	#N/A	citrate_synthase_3%2C_peroxisomal	transferase_activity,_transferring_acyl_groups,_acyl_groups_converted_into_alkyl_on_transfer:tricarboxylic_acid_cycle:fatty_acid_beta-oxidation:plasmodesma:citrate_(Si)-synthase_activity:peroxisome	Citrate_synthase-like,_large_alpha_subdomain:Citrate_synthase:Citrate_synthase,_bacterial-type:Citrate_synthase_active_site	THA.XM_010525774.1
	THA.LOC104802268		tha	#N/A	HOM04D003411	#N/A	protein_TOO_MANY_MOUTHS	protein_binding:anchored_component_of_membrane:plant-type_cell_wall	Leucine-rich_repeat_domain,_L_domain-like:Leucine-rich_repeat	THA.XM_010525775.2
	THA.LOC104802270		tha	#N/A	HOM04D000523	#N/A	HVA22-like_protein_f_isoform_X1	#N/A	TB2/DP1/HVA22-related_protein	THA.XM_019201230.1
	THA.LOC104802271		tha	#N/A	HOM04D005651	#N/A	uncharacterized_protein_LOC104802271_isoform_X2	binding	Armadillo-type_fold:Armadillo-like_helical	THA.XM_019201367.1
	THA.LOC104802272		tha	#N/A	HOM04D000031	ORTHO04D002450	serine/threonine-protein_kinase_STY8-like_isoform_X1	protein_kinase_activity:protein_phosphorylation:ATP_binding:protein_binding:plasma_membrane	Ankyrin_repeat:Protein_kinase_domain:Ankyrin_repeat-containing_domain:Serine-threonine/tyrosine-protein_kinase,_catalytic_domain:Protein_kinase-like_domain	THA.XM_010525778.1
	THA.LOC104802274		tha	#N/A	HOM04D000196	ORTHO04D001088	probable_galacturonosyltransferase_15	polygalacturonate_4-alpha-galacturonosyltransferase_activity:transferase_activity,_transferring_glycosyl_groups	Glycosyl_transferase,_family_8:Nucleotide-diphospho-sugar_transferases:Plant_galacturonosyltransferase_GAUT	THA.XM_010525789.2
	THA.LOC104802275		tha	#N/A	HOM04D005625	#N/A	uncharacterized_protein_LOC104802275	lipid_biosynthetic_process:phosphatidylglycerophosphatase_activity:chloroplast	HAD-superfamily_hydrolase,subfamily_IIIA:HAD-superfamily_phosphatase,_YqeG-like:Mitochondrial_PGP_phosphatase:HAD-like_domain	THA.XM_010525791.2
	THA.LOC104802276		tha	#N/A	HOM04D010848	#N/A	peroxisomal_and_mitochondrial_division_factor_1-like	mitochondrion_organization:plastid:peroxisome_organization:mitochondrion:protein_homodimerization_activity:mitochondrial_membrane:protein_binding:peroxisome:peroxisomal_membrane	#N/A	THA.XM_010525792.2
	THA.LOC104802277		tha	#N/A	HOM04D000142	ORTHO04D000526	mitogen-activated_protein_kinase_20	protein_kinase_activity:ATP_binding:protein_phosphorylation:MAP_kinase_activity:signal_transduction:protein_binding	Protein_kinase_domain:Mitogen-activated_protein_(MAP)_kinase,_conserved_site:Protein_kinase-like_domain	THA.XM_010525793.1
	THA.LOC104802278		tha	#N/A	HOM04D007731	#N/A	uncharacterized_protein_LOC104802278	#N/A	Uncharacterised_protein_family,_basic_secretory_protein	THA.XM_010525795.1
	THA.LOC104802279		tha	#N/A	HOM04D002383	#N/A	ribose-phosphate_pyrophosphokinase_4	nucleoside_metabolic_process:magnesium_ion_binding:ribose_phosphate_diphosphokinase_activity:nucleotide_biosynthetic_process:cytosol:plasma_membrane:cytoplasm:plasmodesma	Phosphoribosyltransferase_domain:Phosphoribosyltransferase-like:Ribose-phosphate_pyrophosphokinase,_N-terminal_domain:Ribose-phosphate_diphosphokinase	THA.XM_010525796.1
	THA.LOC104802280		tha	#N/A	HOM04D000225	#N/A	AT-hook_motif_nuclear-localized_protein_16	DNA_binding:vegetative_to_reproductive_phase_transition_of_meristem:negative_regulation_of_transposition:histone_binding:anther_development:pollen_wall_assembly:protein_binding:nucleus:negative_regulation_of_gibberellic_acid_mediated_signaling_pathway:defense_response_to_bacterium:skotomorphogenesis:negative_regulation_of_defense_response_to_bacterium:AT_DNA_binding:leaf_senescence:histone_deacet…	PPC_domain:AT_hook,_DNA-binding_motif	THA.XM_010525797.2
	THA.LOC104802281		tha	#N/A	HOM04D000009	ORTHO04D000934	probable_receptor-like_protein_kinase_At2g42960_isoform_X1	protein_kinase_activity:ATP_binding:protein_phosphorylation:plasma_membrane:protein_serine/threonine_kinase_activity:protein_autophosphorylation:plasmodesma	Protein_kinase_domain:Protein_kinase,_ATP_binding_site:Protein_kinase-like_domain:Serine/threonine-protein_kinase,_active_site	THA.XM_010525800.2
	THA.LOC104802282		tha	#N/A	HOM04D000042	ORTHO04D005254	aspartyl_protease_family_protein_2-like	aspartic-type_endopeptidase_activity:proteolysis	Pepsin-like_domain,_plant:Xylanase_inhibitor,_C-terminal:Xylanase_inhibitor,_N-terminal:Aspartic_peptidase_A1_family:Aspartic_peptidase_domain:Peptidase_family_A1_domain	THA.XM_010525807.1
	THA.LOC104802283		tha	#N/A	HOM04D006886	#N/A	uncharacterized_protein_LOC104802283	chloroplast_thylakoid_membrane:chloroplast	#N/A	THA.XM_010525808.2
WSB	THA.LOC104802284		tha	AT3G57600	HOM04D000166	ORTHO04D000506	dehydration-responsive_element-binding_protein_2F_isoform_X1	transcription_factor_activity,_sequence-specific_DNA_binding:regulation_of_transcription,_DNA-templated:DNA_binding	DNA-binding_domain:AP2/ERF_domain	THA.XM_010525821.1
	THA.LOC104802285		tha	#N/A	HOM04D000911	#N/A	uncharacterized_protein_LOC104802285	protein_binding:plasma_membrane:calmodulin_binding	Tetratricopeptide_repeat:Tetratricopeptide_repeat-containing_domain:Tetratricopeptide-like_helical_domain	THA.XM_010525812.1
	THA.LOC104802286		tha	#N/A	HOM04D000162	ORTHO04D001512	GDSL_esterase/lipase_At2g42990	hydrolase_activity,_acting_on_ester_bonds	GDSL_lipase/esterase:SGNH_hydrolase-type_esterase_domain	THA.XM_010525814.1
	THA.LOC104802287		tha	#N/A	HOM04D000026	ORTHO04D005467	protein_DETOXIFICATION_41	drug_transmembrane_transport:drug_transmembrane_transporter_activity:antiporter_activity:membrane:transmembrane_transport:solute:proton_antiporter_activity:proanthocyanidin_biosynthetic_process:plant-type_vacuole_membrane:maintenance_of_seed_dormancy	Multi_antimicrobial_extrusion_protein	THA.XM_010525815.2
	THA.LOC104802288		tha	#N/A	HOM04D006551	#N/A	pentatricopeptide_repeat-containing_protein_At3g59040_isoform_X1	protein_binding	Pentatricopeptide_repeat:Tetratricopeptide-like_helical_domain	THA.XM_010525816.1
	THA.LOC104802289		tha	#N/A	HOM04D000045	#N/A	probable_pectinesterase/pectinesterase_inhibitor_35	enzyme_inhibitor_activity:cell_wall:pectinesterase_activity:cell_wall_modification	Pectinesterase_inhibitor_domain:Pectinesterase,_catalytic:Pectin_lyase_fold:Pectin_lyase_fold/virulence_factor:Pectinesterase,_Asp_active_site:Pectinesterase,_Tyr_active_site	THA.XM_010525819.2
	THA.LOC104802290		tha	#N/A	HOM04D006077	#N/A	transcription_factor_IBH1-like	protein_dimerization_activity:response_to_brassinosteroid:sequence-specific_DNA_binding:protein_binding:unidimensional_cell_growth	Myc-type,_basic_helix-loop-helix_(bHLH)_domain	THA.XM_010525820.1
	THA.LOC104802291		tha	#N/A	HOM04D001685	#N/A	pirin-like_protein_2	plasma_membrane:defense_response_to_bacterium:blue_light_signaling_pathway:cytosol:response_to_abscisic_acid:protein_binding:calmodulin_binding:peptidase_inhibitor_activity:abscisic_acid-activated_signaling_pathway:nucleus	RmlC-like_jelly_roll_fold:Pirin:Pirin,_N-terminal_domain:RmlC-like_cupin_domain:Pirin,_C-terminal_domain	THA.XM_010525822.1
	THA.LOC104802292		tha	#N/A	HOM04D000729	#N/A	transcription_factor_bHLH129-like	protein_dimerization_activity:regulation_of_transcription,_DNA-templated:cellular_response_to_abscisic_acid_stimulus:negative_regulation_of_gene_expression:nucleus	Myc-type,_basic_helix-loop-helix_(bHLH)_domain	THA.XM_010525823.1
	THA.LOC104802293		tha	#N/A	HOM04D003805	#N/A	extensin-2-like	structural_constituent_of_cell_wall:plant-type_cell_wall_organization	Extensin_domain	THA.XM_010525824.2
	THA.LOC104802294		tha	#N/A	HOM04D002742	#N/A	mitochondrial_import_inner_membrane_translocase_subunit_tim16	mitochondrial_inner_membrane_presequence_translocase_complex:protein_import_into_mitochondrial_matrix:negative_regulation_of_reactive_oxygen_species_metabolic_process:positive_regulation_of_toxin_transport:mitochondrial_inner_membrane:negative_regulation_of_defense_response:negative_regulation_of_defense_response_to_bacterium:regulation_of_auxin_polar_transport:mitochondrion:cytoplasm:negative_re…	Mitochondrial_import_inner_membrane_translocase_subunit_Tim16:DnaJ_domain	THA.XM_010525825.1
	THA.LOC104802295		tha	#N/A	HOM04D001764	#N/A	clathrin_interactor_EPSIN_2-like_isoform_X1	plasma_membrane:phospholipid_binding:vacuolar_membrane:clathrin_binding:Golgi_apparatus:protein_binding	ENTH__domain:ENTH/VHS	THA.XM_010525826.1
	THA.LOC104802296		tha	#N/A	HOM04D002291	#N/A	solute_carrier_family_35_member_F1-like	transport:integral_component_of_membrane	Solute_carrier_family_35_member_SLC35F1/F2/F6	THA.XM_010525828.1
	THA.LOC104802297		tha	AT3G57610	HOM04D003535	#N/A	adenylosuccinate_synthetase%2C_chloroplastic	adenylosuccinate_synthase_activity:GTP_binding:purine_nucleotide_biosynthetic_process:plastid:response_to_cadmium_ion:AMP_biosynthetic_process:apoplast:chloroplast:chloroplast_stroma	P-loop_containing_nucleoside_triphosphate_hydrolase:Adenylosuccinate_synthetase:Adenylosuccinate_synthase,__active_site:Adenylosuccinate_synthase,_GTP-binding_site	THA.XM_010525833.2
	THA.LOC104802298		tha	#N/A	HOM04D000101	ORTHO04D000994	probable_methyltransferase_PMT19	methyltransferase_activity	Putative_S-adenosyl-L-methionine-dependent_methyltransferase:S-adenosyl-L-methionine-dependent_methyltransferase	THA.XM_010525829.2
	THA.LOC104802299		tha	#N/A	HOM04D000058	ORTHO04D000594	PTI1-like_tyrosine-protein_kinase_3_isoform_X1	protein_kinase_activity:protein_phosphorylation:ATP_binding:plasma_membrane:protein_kinase_binding	Protein_kinase_domain:Protein_kinase,_ATP_binding_site:Serine-threonine/tyrosine-protein_kinase,_catalytic_domain:Protein_kinase-like_domain:Tyrosine-protein_kinase,_active_site	THA.XM_010525830.2
	THA.LOC104802300		tha	#N/A	HOM04D001106	ORTHO04D003638	CMP-sialic_acid_transporter_2	Golgi_membrane:sugar:proton_symporter_activity:carbohydrate_transport:integral_component_of_membrane:Golgi_apparatus	Nucleotide-sugar_transporter	THA.XM_010525832.2
	THA.LOC104802301		tha	#N/A	HOM04D000438	#N/A	lysine-specific_demethylase_JMJ25_isoform_X1	DNA_methylation_on_cytosine:histone_H3-K9_demethylation:pollen_development:regulation_of_gene_expression:histone_demethylase_activity_(H3-K9_specific):RNA-directed_DNA_methylation:leaf_development:negative_regulation_of_gene_silencing:flower_development:production_of_siRNA_involved_in_chromatin_silencing_by_small_RNA:chromatin_DNA_binding	JmjC_domain	THA.XM_010525874.2
	THA.LOC104802302		tha	#N/A	HOM04D003011	#N/A	protein_EMBRYO_DEFECTIVE_1674	nucleoplasm:plasma_membrane:chromocenter:positive_regulation_of_CENP-A_containing_nucleosome_assembly	SANT_associated	THA.XM_010525834.2
	THA.LOC104802303		tha	#N/A	HOM04D004947	#N/A	U11/U12_small_nuclear_ribonucleoprotein_35_kDa_protein_isoform_X2	nucleic_acid_binding:protein_binding:nucleus	RNA_recognition_motif_domain:snRNP35,_RNA_recognition_motif	THA.XM_010525836.2
	THA.LOC104802304		tha	#N/A	HOM04D003874	#N/A	uncharacterized_protein_LOC104802304	#N/A	#N/A	THA.XM_010525837.1
	THA.LOC104802305		tha	#N/A	HOM04D000966	#N/A	uncharacterized_protein_LOC104802305	#N/A	Protein_of_unknown_function_DUF1685	THA.XM_010525838.1
	THA.LOC104802306		tha	#N/A	HOM04D000169	ORTHO04D003670	inositol_transporter_1	integral_component_of_membrane:transmembrane_transporter_activity:transmembrane_transport:membrane:substrate-specific_transmembrane_transporter_activity:transporter_activity:myo-inositol_transport:myo-inositol:proton_symporter_activity:vacuole:plant-type_vacuole_membrane	Major_facilitator_superfamily_domain:Major_facilitator,__sugar_transporter-like:Sugar_transporter,_conserved_site:Sugar/inositol_transporter	THA.XM_010525839.2
	THA.LOC104802307		tha	#N/A	HOM04D006352	#N/A	tetrapyrrole-binding_protein%2C_chloroplastic-like_isoform_X2	enzyme_binding:chloroplast-nucleus_signaling_pathway:positive_regulation_of_catalytic_activity:chloroplast:chlorophyll_biosynthetic_process:tetrapyrrole_binding	GUN4-like	THA.XM_019201187.1
	THA.LOC104802308		tha	AT3G57630	HOM04D003198	#N/A	uncharacterized_protein_LOC104802308	#N/A	Exostosin-like:EGF-like_domain:EGF-like,_conserved_site	THA.XM_019204068.1
	THA.LOC104802309		tha	#N/A	HOM04D009896	#N/A	uncharacterized_protein_LOC104802309_isoform_X1	#N/A	#N/A	THA.XM_010525843.1
	THA.LOC104802310		tha	#N/A	HOM04D000018	ORTHO04D006675	serine/threonine-protein_kinase-like_protein_ACR4_isoform_X1	protein_kinase_activity:protein_phosphorylation:ATP_binding:protein_binding:lateral_root_formation:cell_surface:plasma_membrane:regulation_of_asymmetric_cell_division:embryo_development_ending_in_seed_dormancy:protein_homodimerization_activity:root_cap_development:endocytic_vesicle:root_development	Protein_kinase_domain:Regulator_of_chromosome_condensation_1/beta-lactamase-inhibitor_protein_II:Protein_kinase,_ATP_binding_site:Serine-threonine/tyrosine-protein_kinase,_catalytic_domain:TNFR/NGFR_cysteine-rich_region:Protein_kinase-like_domain:Serine/threonine-protein_kinase,_active_site	THA.XM_010525847.1
	THA.LOC104802311		tha	#N/A	HOM04D007841	#N/A	leucine-rich_repeat_receptor-like_protein_kinase_PEPR1	protein_binding:signal_transduction	Leucine-rich_repeat_domain,_L_domain-like:Leucine-rich_repeat-containing_N-terminal,_plant-type:Leucine-rich_repeat:Leucine_rich_repeat_4	THA.XM_010525850.1
	THA.LOC104802312		tha	#N/A	HOM04D125647	ORTHO04D306283	protein_FAR1-RELATED_SEQUENCE_6-like	#N/A	#N/A	THA.XM_010525851.1
anchor	THA.LOC104802313		tha	AT3G57650	HOM04D001032	ORTHO04D002687	1-acyl-sn-glycerol-3-phosphate_acyltransferase_2	metabolic_process:transferase_activity,_transferring_acyl_groups:endoplasmic_reticulum:1-acylglycerol-3-phosphate_O-acyltransferase_activity	Phospholipid/glycerol_acyltransferase:Acyltransferase,_C-terminal_domain	THA.XM_010525865.1
	THA.LOC104802314		tha	#N/A	HOM04D000272	ORTHO04D009038	protein_STRICTOSIDINE_SYNTHASE-LIKE_13	biosynthetic_process:strictosidine_synthase_activity:pollen_exine_formation:pollen_development:dipeptidase_activity:chloroplast:chloroplast_stroma	Strictosidine_synthase:Six-bladed_beta-propeller,_TolB-like:Strictosidine_synthase,_conserved_region	THA.XM_010525852.1
	THA.LOC104802315		tha	#N/A	HOM04D006065	#N/A	RHOMBOID-like_protein_13	serine-type_endopeptidase_activity:integral_component_of_membrane	Peptidase_S54,_rhomboid_domain	THA.XM_010525853.2
	THA.LOC104802316		tha	#N/A	HOM04D002022	#N/A	3beta-hydroxysteroid-dehydrogenase/decarboxylase	3-beta-hydroxy-delta5-steroid_dehydrogenase_activity:steroid_biosynthetic_process:oxidoreductase_activity,_acting_on_the_CH-OH_group_of_donors,_NAD_or_NADP_as_acceptor:oxidation-reduction_process:plasma_membrane:plasmodesma	NAD(P)-binding_domain:3-beta_hydroxysteroid_dehydrogenase/isomerase:Reticulon	THA.XM_010525854.2
	THA.LOC104802317		tha	#N/A	HOM04D002006	ORTHO04D004455	hydroxyacylglutathione_hydrolase_1%2C_mitochondrial_isoform_X1	hydroxyacylglutathione_hydrolase_activity:methylglyoxal_catabolic_process_to_D-lactate_via_S-lactoyl-glutathione:zinc_ion_binding:beta-lactamase_activity:antibiotic_catabolic_process:response_to_anoxia:response_to_amino_acid:metal_ion_binding:response_to_salt_stress	Hydroxyacylglutathione_hydrolase,_C-terminal_domain:Hydroxyacylglutathione_hydrolase:Beta-lactamase,_class-B,_conserved_site:Metallo-beta-lactamase	THA.XM_010525856.2
	THA.LOC104802318		tha	#N/A	HOM04D001193	#N/A	uncharacterized_protein_LOC104802318_isoform_X1	#N/A	SANT/Myb_domain	THA.XM_019201138.1
	THA.LOC104802319		tha	#N/A	HOM04D001084	ORTHO04D005846	small_G_protein_signaling_modulator_1_isoform_X1	#N/A	Rab-GTPase-TBC_domain	THA.XM_010525863.1
	THA.LOC104802320		tha	#N/A	HOM04D204642	#N/A	defensin-like_protein_195	defense_response	Knottin,_scorpion_toxin-like	THA.XM_010525867.1
	THA.LOC104802321		tha	#N/A	HOM04D004761	#N/A	diphthamide_biosynthesis_protein_2_isoform_X2	peptidyl-diphthamide_biosynthetic_process_from_peptidyl-histidine	Diphthamide_synthesis_DPH1/DPH2:Diphthamide_synthesis_DHP2,_eukaryotic	THA.XM_010525869.1
	THA.LOC104802322		tha	#N/A	HOM04D004515	#N/A	uncharacterized_protein_LOC104802322	chloroplast_thylakoid_membrane:plastid:chloroplast_envelope:chloroplast:nucleus	#N/A	THA.XM_010525870.1
	THA.LOC104802323		tha	#N/A	HOM04D004719	#N/A	signal_recognition_particle_14_kDa_protein	signal_recognition_particle,_endoplasmic_reticulum_targeting:SRP-dependent_cotranslational_protein_targeting_to_membrane:7S_RNA_binding:endoplasmic_reticulum_signal_peptide_binding:signal_recognition_particle	Signal_recognition_particle,_SRP9/SRP14_subunit:Signal_recognition_particle,_SRP14_subunit	THA.XM_010525873.1
	THA.LOC104802324		tha	AT3G57670	HOM04D000654	#N/A	zinc_finger_protein_WIP2-like	nucleic_acid_binding:cell_fate_determination:transmitting_tissue_development:regulation_of_transcription,_DNA-templated:primary_root_development:regulation_of_gene_expression:pollen_tube_growth:fruit_replum_development:nucleus	Zinc_finger_C2H2-type	THA.XM_010525878.2
	THA.LOC104824433		tha	#N/A	HOM04D000037	ORTHO04D004005	agamous-like_MADS-box_protein_AGL18_isoform_X1	RNA_polymerase_II_regulatory_region_sequence-specific_DNA_binding:positive_regulation_of_transcription_from_RNA_polymerase_II_promoter:DNA_binding:protein_dimerization_activity:transcription_factor_activity,_sequence-specific_DNA_binding:nucleus:regulation_of_transcription,_DNA-templated:negative_regulation_of_flower_development:pollen_development:negative_regulation_of_short-day_photoperiodism,_…	Transcription_factor,_MADS-box:Transcription_factor,_K-box:MADS_MEF2-like	THA.XM_010556516.1
	THA.LOC104824434		tha	#N/A	HOM04D001424	#N/A	NADPH-dependent_thioredoxin_reductase_3-like_isoform_X1	oxidoreductase_activity:oxidation-reduction_process:cell_redox_homeostasis:thioredoxin-disulfide_reductase_activity:cytoplasm:removal_of_superoxide_radicals:hydrogen_peroxide_catabolic_process:enzyme_activator_activity:oxidoreductase_activity,_acting_on_a_sulfur_group_of_donors,_disulfide_as_acceptor:regulation_of_chlorophyll_biosynthetic_process:positive_regulation_of_catalytic_activity:protein_…	Pyridine_nucleotide-disulphide_oxidoreductase,_class-II:Thioredoxin-like_fold:Thioredoxin_reductase:Thioredoxin_domain:Pyridine_nucleotide-disulphide_oxidoreductase,_class-II,_active_site:FAD/NAD(P)-binding_domain	THA.XM_010556518.1
	THA.LOC104824435		tha	#N/A	HOM04D000578	ORTHO04D005289	ABC_transporter_A_family_member_1-like	transporter_activity:transport:integral_component_of_membrane:ATP_binding:ATPase_activity	#N/A	THA.XM_010556520.2
	THA.LOC104824436		tha	#N/A	HOM04D000578	ORTHO04D005289	ABC_transporter_A_family_member_1	transporter_activity:transport:integral_component_of_membrane:ATP_binding:ATPase_activity:vacuolar_membrane	ABC_transporter_A,_ABCA:ABC_transporter,_conserved_site:ABC_transporter-like:P-loop_containing_nucleoside_triphosphate_hydrolase:AAA+_ATPase_domain	THA.XM_010556521.1
	THA.LOC104824437		tha	#N/A	HOM04D000122	#N/A	heat_stress_transcription_factor_B-3	transcription_factor_activity,_sequence-specific_DNA_binding:nucleus:regulation_of_transcription,_DNA-templated:sequence-specific_DNA_binding:response_to_cadmium_ion	Heat_shock_factor_(HSF)-type,_DNA-binding:Heat_shock_transcription_factor_family:Winged_helix-turn-helix_DNA-binding_domain	THA.XM_010556522.2
	THA.LOC104824439		tha	#N/A	HOM04D000150	#N/A	AP2-like_ethylene-responsive_transcription_factor_At2g41710	transcription_factor_activity,_sequence-specific_DNA_binding:regulation_of_transcription,_DNA-templated:multicellular_organism_development:DNA_binding:nucleus	DNA-binding_domain:AP2/ERF_domain:AP2-like_ethylene-responsive_transcription_factor	THA.XM_010556524.2
	THA.LOC104824440		tha	#N/A	HOM04D002565	ORTHO04D004506	uncharacterized_protein_LOC104824440	#N/A	#N/A	THA.XM_010556525.2
	THA.LOC104824441		tha	#N/A	HOM04D000900	#N/A	villin-3_isoform_X1	actin_binding:cytoskeleton_organization:actin_filament_binding:actin_filament_bundle_assembly:actin_filament:cytoplasm:protein_binding:actin_filament_severing	Gelsolin-like_domain:Villin/Gelsolin:Villin-2/3/4/5,_plant:ADF-H/Gelsolin-like_domain:Villin_headpiece	THA.XM_010556528.2
	THA.LOC104824442		tha	#N/A	HOM04D003022	#N/A	uncharacterized_protein_LOC104824442	#N/A	Domain_of_unknown_function_DUF1985	THA.XM_010556530.2
	THA.LOC104824443		tha	#N/A	HOM04D001066	#N/A	insulin-degrading_enzyme-like_1%2C_peroxisomal_isoform_X1	metalloendopeptidase_activity:proteolysis:catalytic_activity:metal_ion_binding	Peptidase_M16,_middle/third_domain:Peptidase_M16,_C-terminal:Peptidase_M16,_zinc-binding_site:Metalloenzyme,_LuxS/M16_peptidase-like:Peptidase_M16,_N-terminal	THA.XM_010556531.2
	THA.LOC104824444		tha	#N/A	HOM04D000604	#N/A	uncharacterized_protein_LOC104824444	anchored_component_of_membrane:root_morphogenesis:plant-type_cell_wall:plasma_membrane:cell_wall:response_to_karrikin:regulation_of_cell_wall_pectin_metabolic_process:plasmodesma:negative_regulation_of_unidimensional_cell_growth	Domain_of_unknown_function_DUF642:Galactose-binding_domain-like	THA.XM_010556533.2
	THA.LOC104824445		tha	#N/A	HOM04D000035	ORTHO04D006220	leucine-rich_repeat_receptor-like_tyrosine-protein_kinase_PXC3	protein_binding:protein_kinase_activity:ATP_binding:protein_phosphorylation:plasma_membrane	Protein_kinase_domain:Leucine-rich_repeat_domain,_L_domain-like:Leucine-rich_repeat:Protein_kinase-like_domain:Tyrosine-protein_kinase,_active_site	THA.XM_010556534.2
	THA.LOC104824446		tha	#N/A	HOM04D000611	#N/A	NDR1/HIN1-like_protein_12	plasma_membrane:plant-type_cell_wall:response_to_virus:plasmodesma:defense_response_to_virus	Late_embryogenesis_abundant_protein,_LEA-14:Immunoglobulin-like_fold	THA.XM_010556539.1
	THA.LOC104824447		tha	#N/A	HOM04D003742	#N/A	uncharacterized_protein_LOC104824447	plastid:response_to_reactive_oxygen_species:response_to_ozone:membrane:mitochondrion:response_to_bacterium:peroxisome	Protein_of_unknown_function_DUF1138	THA.XM_010556535.1
	THA.LOC104824448		tha	#N/A	HOM04D091662	ORTHO04D306142	LOW_QUALITY_PROTEIN:_40S_ribosomal_protein_S2-4	structural_constituent_of_ribosome:ribosome:translation:RNA_binding:small_ribosomal_subunit	Ribosomal_protein_S5_domain_2-type_fold,_subgroup:Ribosomal_protein_S5:Ribosomal_protein_S5_domain_2-type_fold:Ribosomal_protein_S5,_C-terminal:Ribosomal_protein_S5,_eukaryotic/archaeal:Ribosomal_protein_S5,_N-terminal:Ribosomal_protein_S5,_N-terminal,_conserved_site	THA.XM_010556537.1
	THA.LOC104824449		tha	#N/A	HOM04D000044	ORTHO04D000190	polygalacturonase_ADPG2-like	polygalacturonase_activity:carbohydrate_metabolic_process:fruit_dehiscence:anther_dehiscence:floral_organ_abscission:cell_wall_modification_involved_in_abscission	Parallel_beta-helix_repeat:Pectin_lyase_fold:Glycoside_hydrolase,_family_28:Pectin_lyase_fold/virulence_factor	THA.XM_010556538.1
	THA.LOC104824451		tha	#N/A	HOM04D000449	#N/A	probable_galactinol--sucrose_galactosyltransferase_2	catalytic_activity:negative_regulation_of_abscisic_acid-activated_signaling_pathway:endoplasmic_reticulum:response_to_karrikin:raffinose_alpha-galactosidase_activity:raffinose_catabolic_process:plasmodesma:abscisic_acid-activated_signaling_pathway:galactinol-sucrose_galactosyltransferase_activity:response_to_oxidative_stress	Glycoside_hydrolase_superfamily:Aldolase-type_TIM_barrel:Glycosyl_hydrolases_36	THA.XM_010556540.2
	THA.LOC104824453		tha	#N/A	HOM04D004328	#N/A	remorin-like	plasma_membrane:negative_regulation_of_brassinosteroid_mediated_signaling_pathway:abscisic_acid-activated_signaling_pathway	Remorin,_C-terminal	THA.XM_010556541.2
	THA.LOC104824454		tha	#N/A	HOM04D003151	#N/A	guanylate_kinase_2-like	guanylate_kinase_activity:purine_nucleotide_metabolic_process:nucleotide_metabolic_process:regulation_of_developmental_growth:gametophyte_development	Guanylate_kinase,_conserved_site:Guanylate_kinase:P-loop_containing_nucleoside_triphosphate_hydrolase:Galactose_oxidase/kelch,_beta-propeller:Guanylate_kinase/L-type_calcium_channel_beta_subunit:Guanylate_kinase-like_domain	THA.XM_010556542.2
	THA.LOC104824455		tha	#N/A	HOM04D000325	ORTHO04D001896	zinc_finger_CCCH_domain-containing_protein_30-like	metal_ion_binding:protein_binding	Ankyrin_repeat:Zinc_finger,_CCCH-type:Ankyrin_repeat-containing_domain	THA.XM_010556543.1
	THA.LOC104824456		tha	#N/A	HOM04D001506	#N/A	uncharacterized_protein_LOC104824456	response_to_karrikin	#N/A	THA.XM_010556546.1
anchor	THA.LOC104824457		tha	AT3G57650	HOM04D001032	ORTHO04D002687	1-acyl-sn-glycerol-3-phosphate_acyltransferase_2	metabolic_process:transferase_activity,_transferring_acyl_groups:endoplasmic_reticulum:1-acylglycerol-3-phosphate_O-acyltransferase_activity	Phospholipid/glycerol_acyltransferase:Acyltransferase,_C-terminal_domain	THA.XM_010556544.2
	THA.LOC104824458		tha	AT3G57670	HOM04D000654	#N/A	zinc_finger_protein_WIP2-like	nucleic_acid_binding:transmitting_tissue_development:cell_fate_determination:regulation_of_gene_expression:regulation_of_transcription,_DNA-templated:primary_root_development:pollen_tube_growth:nucleus:fruit_replum_development	Zinc_finger_C2H2-type	THA.XM_010556545.1
	THA.LOC104824460		tha	#N/A	HOM04D000729	#N/A	transcription_factor_bHLH130-like_isoform_X1	protein_dimerization_activity:regulation_of_transcription,_DNA-templated:photoperiodism,_flowering	Myc-type,_basic_helix-loop-helix_(bHLH)_domain	THA.XM_010556547.2
	Cpa.g.sc92.5		cpa	AT3G57660	HOM04D134417	ORTHO04D005058	DNA-directed_5'-3'_RNA_polymerase_activity:nucleus:transcription,_DNA-templated:zinc_ion_binding:DNA_binding	RNA:polymerase:Rpb1,:domain:5:DNA-directed:RNA:pol:I,:largest:subunit
	Cpa.g.sc92.6		cpa	#N/A	HOM04D134417	ORTHO04D005058	DNA-directed_5'-3'_RNA_polymerase_activity:nucleus:transcription,_DNA-templated:zinc_ion_binding:DNA_binding:plasmodesma	RNA:polymerase,:alpha:subunit:RNA:polymerase:Rpb1,:domain:4:RNA:polymerase:Rpb1,:domain:5:RNA:polymerase:Rpb1,:domain:3:DNA-directed:RNA:pol:I,:largest:subunit
	Cpa.g.sc92.7		cpa	#N/A	HOM04D134417	ORTHO04D005058	DNA-directed_5'-3'_RNA_polymerase_activity:nucleus:transcription,_DNA-templated:zinc_ion_binding:DNA_binding	RNA:polymerase:Rpb1,:domain:1:DNA-directed:RNA:pol:I,:largest:subunit
	Cpa.g.sc92.8		cpa	#N/A	HOM04D134417	#N/A	#N/A	#N/A
	Cpa.g.sc92.9		cpa	#N/A	HOM04D134417	#N/A	#N/A	#N/A
	Cpa.g.sc92.10		cpa	AT3G57650	HOM04D134417	ORTHO04D002687	metabolic_process:transferase_activity,_transferring_acyl_groups	Acyltransferase,:C-terminal:domain
	Cpa.g.sc92.11		cpa	#N/A	HOM04D134417	ORTHO04D002867	metabolic_process:transferase_activity,_transferring_acyl_groups	Phospholipid/glycerol:acyltransferase
	Cpa.g.sc92.12		cpa	AT3G57630	HOM04D134417	#N/A	#N/A	Exostosin-like:EGF-like:domain:EGF-like,:conserved:site
	Cpa.g.sc92.13		cpa	AT3G57610	HOM04D134417	#N/A	adenylosuccinate_synthase_activity:GTP_binding:purine_nucleotide_biosynthetic_process:plastid:response_to_cadmium_ion:AMP_biosynthetic_process:apoplast:chloroplast:chloroplast_stroma	Exostosin-like:P-loop:containing:nucleoside:triphosphate:hydrolase:Adenylosuccinate:synthetase:Adenylosuccinate:synthase,:active:site
	Cpa.g.sc92.14		cpa	#N/A	HOM04D134417	#N/A	adenylosuccinate_synthase_activity:GTP_binding:purine_nucleotide_biosynthetic_process	P-loop:containing:nucleoside:triphosphate:hydrolase:Adenylosuccinate:synthetase:Adenylosuccinate:synthase,:GTP-binding:site
	Cpa.g.sc92.15		cpa	#N/A	HOM04D134417	ORTHO04D006504	DNA_binding:ATP_binding	Helicase:SMUBP-2/Hcs1-like:Helicase:superfamily:1/2,:ATP-binding:domain:P-loop:containing:nucleoside:triphosphate:hydrolase:AAA+:ATPase:domain
WSB	Cpa.g.sc92.16		cpa	AT3G57600	HOM04D134417	ORTHO04D000506	transcription_factor_activity,_sequence-specific_DNA_binding:regulation_of_transcription,_DNA-templated:DNA_binding	DNA-binding:domain:AP2/ERF:domain
	Cpa.g.sc92.17		cpa	#N/A	HOM04D134417	#N/A	DNA_binding:response_to_salicylic_acid:response_to_jasmonic_acid:plasmodesma	Homeobox:domain-like:Zinc:finger,:PHD-type,:conserved:site:Myb:domain:SANT/Myb:domain:Zinc:finger,:RING/FYVE/PHD-type:Zinc:finger,:FYVE/PHD-type:Zinc:finger,:RING-type:Zinc:finger,:PHD-type
	Cpa.g.sc92.18		cpa	#N/A	HOM04D134417	ORTHO04D095884	#N/A	#N/A
	Cpa.g.sc92.19		cpa	AT3G57570	HOM04D134417	#N/A	binding	Armadillo-type:fold:Armadillo-like:helical
	Cpa.g.sc92.20		cpa	#N/A	HOM04D134417	#N/A	binding	#N/A
	Cpa.g.sc92.21		cpa	#N/A	HOM04D134417	#N/A	protein_binding:cytidine_to_uridine_editing	Pentatricopeptide:repeat:Tetratricopeptide-like:helical:domain
	Cpa.g.sc92.22		cpa	#N/A	HOM04D134417	ORTHO04D011237	zinc_ion_binding:protein_binding	DYW:domain
	Cpa.g.sc92.23		cpa	#N/A	HOM04D134417	ORTHO04D001896	metal_ion_binding:protein_binding:regulation_of_transcription,_DNA-templated:cytoplasm:nucleus	Ankyrin:repeat:Zinc:finger,:CCCH-type:Ankyrin:repeat-containing:domain
	Cpa.g.sc92.24		cpa	#N/A	HOM04D134417	#N/A	#N/A	#N/A
	Cpa.g.sc92.25		cpa	#N/A	HOM04D134417	#N/A	#N/A	#N/A
	Cpa.g.sc92.26		cpa	#N/A	HOM04D134417	ORTHO04D005726	recognition_of_pollen:protein_serine/threonine_kinase_activity:protein_phosphorylation:protein_kinase_activity:ATP_binding	EGF-like:domain:S-locus:glycoprotein:domain:PAN/Apple:domain:Bulb-type:lectin:domain
	Cpa.g.sc92.27		cpa	AT3G57550	HOM04D134417	#N/A	guanylate_kinase_activity:purine_nucleotide_metabolic_process:nucleotide_metabolic_process:regulation_of_developmental_growth:gametophyte_development	Guanylate:kinase,:conserved:site:Guanylate:kinase:P-loop:containing:nucleoside:triphosphate:hydrolase:Galactose:oxidase/kelch,:beta-propeller:Guanylate:kinase/L-type:calcium:channel:beta:subunit:Guanylate:kinase-like:domain
	Cpa.g.sc92.28		cpa	AT3G57540	HOM04D134417	#N/A	plasma_membrane:negative_regulation_of_brassinosteroid_mediated_signaling_pathway:abscisic_acid-activated_signaling_pathway	Remorin,:C-terminal
	Cpa.g.sc92.29		cpa	#N/A	HOM04D134417	ORTHO04D011151	protein_binding	Pentatricopeptide:repeat:Tetratricopeptide-like:helical:domain
	Cpa.g.sc92.30		cpa	#N/A	HOM04D134417	ORTHO04D006726	GTP_binding:GTPase_activity:response_to_reactive_oxygen_species:chloroplast_RNA_processing:regulation_of_gene_expression:chloroplast_stroma:chloroplast	Translation:elongation:factor:EFTu-like,:domain:2:Transcription:factor,:GTP-binding:domain:Translation:elongation:factor:EFG,:V:domain:Elongation:factor:G,:III-V:domain:Translation:protein,:beta-barrel:domain:Small:GTP-binding:protein:domain:P-loop:containing:nucleoside:triphosphate:hydrolase:GTP-binding:protein:TypA:Tr-type:G:domain,:conserved:site
	Cpa.g.sc92.31		cpa	AT3G57530	HOM04D134417	ORTHO04D000572	calcium_ion_binding:protein_kinase_activity:ATP_binding:protein_phosphorylation:calcium-dependent_protein_kinase_C_activity:plasma_membrane:protein_serine/threonine_kinase_activity:protein_autophosphorylation:cytoplasm:response_to_salt_stress:plasmodesma:response_to_abscisic_acid:protein_binding:abscisic_acid-activated_signaling_pathway:nucleus	EF-hand:domain:Protein:kinase:domain:Protein:kinase,:ATP:binding:site:Protein:kinase-like:domain:Serine/threonine-protein:kinase,:active:site:EF-hand:domain:pair:EF-Hand:1,:calcium-binding:site
	Cpa.g.sc84.46		cpa	AT3G57530	HOM04D134417	ORTHO04D000572	calcium_ion_binding:protein_kinase_activity:ATP_binding:protein_phosphorylation:plasma_membrane	EF-hand:domain:Protein:kinase:domain:Protein:kinase,:ATP:binding:site:Protein:kinase-like:domain:Serine/threonine-protein:kinase,:active:site:EF-hand:domain:pair:EF-Hand:1,:calcium-binding:site
	Cpa.g.sc84.47		cpa	#N/A	HOM04D134417	#N/A	chloroplast_thylakoid_membrane:chloroplast	#N/A
	Cpa.g.sc84.48		cpa	#N/A	HOM04D134417	#N/A	protein_transporter_activity:protein_transport:integral_component_of_membrane:plasma_membrane	Translocation:protein:Sec62
	Cpa.g.sc84.49		cpa	#N/A	HOM04D134417	ORTHO04D002358	transcription_factor_activity,_sequence-specific_DNA_binding:regulation_of_transcription,_DNA-templated:DNA_binding:CCAAT-binding_factor_complex:pollen_development:seed_development:microgametogenesis:regulation_of_timing_of_transition_from_vegetative_to_reproductive_phase:embryo_development_ending_in_seed_dormancy:negative_regulation_of_transcription,_DNA-templated:somatic_embryogenesis	CCAAT-binding:factor,:conserved:site:Nuclear:transcription:factor:Y:subunit:A
	Cpa.g.sc84.5		cpa	#N/A	HOM04D134417	#N/A	copper_ion_binding:oxidoreductase_activity:oxidation-reduction_process:lignin_catabolic_process:apoplast:hydroquinone:oxygen_oxidoreductase_activity:plant-type_secondary_cell_wall_biogenesis:lignin_biosynthetic_process	Multicopper:oxidase,:copper-binding:site:Laccase,:second:cupredoxin:domain:Laccase,:first:cupredoxin:domain:Laccase,:third:cupredoxin:domain:Laccase:Multicopper:oxidase,:type:1:Multicopper:oxidase,:type:2:Multicopper:oxidase,:type:3:Multicopper:oxidases,:conserved:site:Cupredoxin
	Cpa.g.sc84.50		cpa	#N/A	HOM04D134417	ORTHO04D002358	transcription_factor_activity,_sequence-specific_DNA_binding:regulation_of_transcription,_DNA-templated:DNA_binding:CCAAT-binding_factor_complex	Nuclear:transcription:factor:Y:subunit:A
	Cpa.g.sc84.51		cpa	#N/A	HOM04D134417	#N/A	#N/A	#N/A
	Cpa.g.sc84.52		cpa	#N/A	HOM04D134417	#N/A	phosphorelay_signal_transduction_system:protein_binding:phosphorelay_sensor_kinase_activity:signal_transduction:protein_histidine_kinase_activity:endoplasmic_reticulum_membrane:negative_regulation_of_ethylene-activated_signaling_pathway:ethylene_receptor_activity:response_to_stimulus:ethylene_binding:phosphorylation:transferase_activity,_transferring_phosphorus-containing_groups:hydrogen_peroxide…	Signal:transduction:histidine:kinase-related:protein,:C-terminal:Ethylene:receptor:GAF:domain-like:Histidine:kinase:domain:GAF:domain:Signal:transduction:histidine:kinase,:dimerisation/phosphoacceptor:domain:Histidine:kinase-like:ATPase,:C-terminal:domain:CheY-like:superfamily:Signal:transduction:response:regulator,:receiver:domain
	Cpa.g.sc84.53		cpa	#N/A	HOM04D134417	#N/A	protein_binding_involved_in_protein_folding:chaperone-mediated_protein_folding:chloroplast_stroma	Chaperonin-like:RbcX
	Cpa.g.sc84.54		cpa	#N/A	HOM04D134417	#N/A	binding:protein_binding	Armadillo-type:fold:Armadillo-like:helical
	Cpa.g.sc84.55		cpa	#N/A	HOM04D134417	#N/A	binding:protein_binding	Armadillo-type:fold:Armadillo-like:helical
	Cpa.g.sc84.56		cpa	#N/A	HOM04D134417	#N/A	protein_binding	Pentatricopeptide:repeat:Tetratricopeptide-like:helical:domain
	Cpa.g.sc84.57		cpa	#N/A	HOM04D134417	#N/A	drug_transmembrane_transport:drug_transmembrane_transporter_activity:antiporter_activity:membrane:transmembrane_transport:citrate_transport:citrate_transmembrane_transporter_activity:response_to_aluminum_ion	Multi:antimicrobial:extrusion:protein
	Cpa.g.sc84.58		cpa	#N/A	HOM04D134417	ORTHO04D005919	transporter_activity:sodium_ion_transport:membrane:transmembrane_transport:alpha-ketoglutarate_transmembrane_transporter_activity:malate_transmembrane_transport:mitochondrion:ammonia_assimilation_cycle:oxaloacetate_transport:chloroplast:response_to_nematode:plastid:chloroplast_thylakoid:chloroplast_envelope:malate_transmembrane_transporter_activity:oxaloacetate_transmembrane_transporter_activity:…	Citrate:carrier:CitT-related:Solute:carrier:family:13
	Cpa.g.sc84.59		cpa	#N/A	HOM04D134417	ORTHO04D002021	DNA_binding:regulation_of_secondary_cell_wall_biogenesis:positive_regulation_of_secondary_cell_wall_biogenesis:plant-type_secondary_cell_wall_biogenesis:response_to_salicylic_acid:defense_response_to_fungus:sequence-specific_DNA_binding:positive_regulation_of_transcription,_DNA-templated:transcription_factor_activity,_sequence-specific_DNA_binding:nucleus	Homeobox:domain-like:Myb:domain:SANT/Myb:domain
	Cpa.g.sc84.6		cpa	#N/A	HOM04D134417	#N/A	endosperm_development:embryo_development_ending_in_seed_dormancy	#N/A
	Cpa.g.sc84.60		cpa	#N/A	HOM04D134417	ORTHO04D010740	protein_binding	Pentatricopeptide:repeat:Tetratricopeptide-like:helical:domain
	Cpa.g.sc84.61		cpa	#N/A	HOM04D134417	ORTHO04D014791	nucleolus:GTP_binding	Nucleolar:GTP-binding:protein:1
	Cpa.g.sc84.62		cpa	#N/A	HOM04D134417	ORTHO04D007412	tRNA_processing:transferase_activity:sulfurtransferase_activity	tRNA-specific:2-thiouridylase:Rossmann-like:alpha/beta/alpha:sandwich:fold:Adenine:nucleotide:alpha:hydrolase-like:domains
	Cpa.g.sc84.63		cpa	#N/A	HOM04D134417	ORTHO04D006979	GTP_binding:chloroplast	GTP-binding:protein:EngA:Small:GTP-binding:protein:domain:GTPase:Der,:C-terminal:KH-domain-like:P-loop:containing:nucleoside:triphosphate:hydrolase:K:homology:domain-like,:alpha/beta:GTP:binding:domain:EngA-type:guanine:nucleotide-binding:(G):domain
	Cpa.g.sc84.64		cpa	#N/A	HOM04D134417	#N/A	metabolic_process:oxidoreductase_activity:oxidation-reduction_process:aldehyde_dehydrogenase_[NAD(P)+]_activity:cellular_aldehyde_metabolic_process	Aldehyde:dehydrogenase:N-terminal:domain:Aldehyde/histidinol:dehydrogenase:Aldehyde:dehydrogenase:NAD(P)-dependent:Aldehyde:dehydrogenase:domain
	Cpa.g.sc84.65		cpa	#N/A	HOM04D134417	#N/A	chromatin_binding:regulation_of_transcription,_DNA-templated:double_fertilization_forming_a_zygote_and_endosperm:protein_binding:double-stranded_methylated_DNA_binding:ATP_binding	Zinc:finger,:PHD-type,:conserved:site:Zinc:finger,:PHD-finger:P-loop:containing:nucleoside:triphosphate:hydrolase:Bromo:adjacent:homology:(BAH):domain:Zinc:finger,:RING/FYVE/PHD-type:Zinc:finger,:FYVE/PHD-type:Zinc:finger,:RING-type:Zinc:finger,:PHD-type
	Cpa.g.sc84.66		cpa	#N/A	HOM04D134417	#N/A	nucleic_acid_binding:mRNA_binding	RNA:recognition:motif:domain
anchor	Cpa.g.sc84.67		cpa	AT3G57650	HOM04D134417	ORTHO04D002687	metabolic_process:transferase_activity,_transferring_acyl_groups:endoplasmic_reticulum:1-acylglycerol-3-phosphate_O-acyltransferase_activity	Phospholipid/glycerol:acyltransferase:Acyltransferase,:C-terminal:domain
	Cpa.g.sc84.68		cpa	#N/A	HOM04D134417	ORTHO04D002687	metabolic_process:transferase_activity,_transferring_acyl_groups	Phospholipid/glycerol:acyltransferase:Acyltransferase,:C-terminal:domain
	Cpa.g.sc84.69		cpa	#N/A	HOM04D134417	ORTHO04D004779	catalytic_activity:flavin_adenine_dinucleotide_binding:oxidation-reduction_process:oxidoreductase_activity:metal_ion_binding:electron_carrier_activity:iron-sulfur_cluster_binding:iron_ion_binding:2_iron,_2_sulfur_cluster_binding:oxidoreductase_activity,_acting_on_CH-OH_group_of_donors:response_to_water_deprivation:superoxide_anion_generation:response_to_reactive_oxygen_species:cytosol:purine_nucl…	FAD-binding,:type:2:FAD-binding,:type:2,:subdomain:1:CO:dehydrogenase:flavoprotein-like,:FAD-binding,:subdomain:2:Aldehyde:oxidase/xanthine:dehydrogenase:Molybdopterin:dehydrogenase,:FAD-binding:[2Fe-2S]-binding:Beta-grasp:domain:Aldehyde:oxidase/xanthine:dehydrogenase,:a/b:hammerhead:CO:dehydrogenase:flavoprotein,:C-terminal:2Fe-2S:ferredoxin-type:iron-sulfur:binding:domain:Aldehyde:oxidase/xant…
	Cpa.g.sc84.7		cpa	#N/A	HOM04D134417	ORTHO04D007108	ATP_binding:chlorophyll_biosynthetic_process:magnesium_chelatase_activity:chloroplast_thylakoid:magnesium_chelatase_complex:chloroplast:chloroplast_stroma	von:Willebrand:factor,:type:A:Magnesium:chelatase:ChlI:domain:P-loop:containing:nucleoside:triphosphate:hydrolase:AAA+:ATPase:domain:Magnesium:chelatase,:ATPase:subunit:D
	Cpa.g.sc84.70		cpa	#N/A	HOM04D134417	ORTHO04D011521	transporter_activity:mitochondrial_inner_membrane:transport:transmembrane_transport	Adenine:nucleotide:translocator:1:Mitochondrial:carrier:protein:Mitochondrial:carrier:domain:Mitochondrial:substrate/solute:carrier
	Cpa.g.sc84.71		cpa	#N/A	HOM04D134417	ORTHO04D092684	#N/A	#N/A
	Cpa.g.sc84.72		cpa	#N/A	HOM04D134417	ORTHO04D001433	metal_ion_transport:metal_ion_binding:nucleotide_binding:integral_component_of_membrane:cation_transport:cation-transporting_ATPase_activity:copper_ion_binding	P-type:ATPase,:subfamily:IB:Heavy-metal-associated,:conserved:site:HAD-like:domain:P-type:ATPase,:transmembrane:domain:P-type:ATPase,:cytoplasmic:domain:N:P-type:ATPase:P-type:ATPase,:A:domain:P-type:ATPase,:phosphorylation:site:Heavy:metal-associated:domain,:copper:ion-binding:Heavy:metal-associated:domain,:HMA
	Cpa.g.sc84.73		cpa	#N/A	HOM04D134417	ORTHO04D006399	outer_membrane:plastid:chloroplast_organization:chloroplast_envelope:membrane:mitochondrion:embryo_development_ending_in_seed_dormancy:chloroplast	Bacterial:surface:antigen:(D15):POTRA:domain
	Cpa.g.sc84.74		cpa	AT3G57670	HOM04D134417	#N/A	nucleic_acid_binding:cell_fate_determination:transmitting_tissue_development:regulation_of_gene_expression:regulation_of_transcription,_DNA-templated:primary_root_development:pollen_tube_growth:nucleus:fruit_replum_development	Zinc:finger:C2H2-type
